# Supplementary material for: Construction of an SNP fingerprinting database and population genetic analysis of 329 cauliflower cultivars
Source: BMC Plant Biol. 2022 Nov 10;22:522. doi: 10.1186/s12870-022-03920-2 (PMC9647966; doi:10.1186/s12870-022-03920-2)
Supplement: Supplementary file 1 — Additional file 1. [file 12870_2022_3920_MOESM1_ESM.xlsx]

## Sheet: Table S1
Table S1. Information of 329 cauliflower cultivars
ID	Name	Population	Source	Curd type	Fingerprint code
CauAC022	Biyu50	Pop-1	China	Compact	C|C:C|T:C|A:A|T:C|T:G|T:A|A:A|A:G|A:G|A:T|A:T|T:T|T:C|T:C|T:C|C:C|G:A|A:T|C:C|G:G|C:C|G:C|T:A|G:G|G:T|T:T|T:A|G:G|G:G|G:G|G:T|C:A|A:T|A:C|G:A|G:A|A:A|C:A|C:C|C:C|T
CauAC023	Biyu60	Pop-1	China	Compact	C|G:T|T:A|A:T|T:T|C:T|T:A|C:T|A:G|G:A|A:T|A:T|C:T|T:C|T:T|T:T|T:G|C:A|G:T|T:C|G:G|C:G|G:T|T:A|A:G|C:G|T:C|C:A|A:T|T:C|G:G|G:C|T:A|A:A|A:G|C:G|G:G|A:A|A:C|A:C|C:T|C
CauAC027	Songpin56	Pop-1	China	Compact	G|G:T|T:C|C:T|A:T|C:T|G:A|C:A|A:A|A:A|A:T|A:T|C:T|T:T|C:T|C:C|T:C|C:G|G:T|T:C|C:G|G:G|G:T|T:G|A:C|G:T|G:C|C:A|G:T|T:G|G:G|G:T|T:G|G:T|A:C|G:G|A:A|G:A|A:C|A:T|T:C|T
CauAC031	Unknown	Pop-1	China	Loose	C|C:C|T:C|A:A|T:C|T:G|T:A|A:A|A:G|A:G|A:T|A:T|T:T|T:T|C:T|C:C|C:G|C:A|A:C|T:G|C:C|G:C|G:C|T:G|A:G|G:T|T:T|T:G|A:G|G:G|G:G|G:C|T:A|A:A|T:G|C:G|A:A|A:C|A:C|A:C|C:T|C
CauAC033	3Snaire	Pop-1	Abroad	Compact	C|C:T|T:A|A:T|T:C|T:T|T:C|A:A|A:A|A:A|A:A|A:T|T:T|T:C|C:C|T:T|T:C|G:A|A:T|T:C|C:G|G:C|G:C|T:G|G:C|G:T|T:C|C:A|G:T|T:G|G:A|A:T|T:G|G:T|T:C|C:G|A:A|A:A|A:C|A:T|C:C|C
CauAC034	Sudorshon	Pop-1	Abroad	Compact	G|G:T|T:C|C:A|A:C|C:G|T:C|C:A|A:A|A:G|A:T|A:T|C:A|T:C|T:C|T:C|C:C|G:G|A:T|C:C|G:G|C:G|G:T|T:A|G:C|G:G|G:C|C:G|A:T|T:G|G:G|G:T|C:A|G:A|A:G|G:A|A:G|A:A|C:A|C:T|C:T|T
CauAC035	Alfa_Sun	Pop-1	Abroad	Compact	C|C:C|T:C|A:A|T:C|T:G|T:A|C:T|A:G|A:G|A:T|A:T|T:A|T:T|C:C|T:C|C:G|C:G|A:C|T:G|C:C|G:C|G:C|T:A|G:G|C:T|T:T|T:A|G:G|G:G|G:A|A:C|T:G|G:T|T:C|C:G|A:G|A:C|A:C|C:C|T:C|C
CauAC036	Glacier	Pop-1	Abroad	Compact	G|G:T|T:C|C:A|T:C|T:G|T:C|A:A|A:A|A:A|A:A|T:C|T:A|T:T|C:T|C:T|T:C|C:G|G:T|T:C|C:G|G:G|G:T|T:A|G:G|C:G|T:C|C:G|A:T|T:G|G:G|G:T|T:G|G:A|T:G|C:A|G:G|A:A|A:A|C:T|T:T|C
CauAC037	Polo	Pop-1	Abroad	Compact	G|C:T|T:C|A:A|T:C|T:G|T:C|C:A|A:G|A:G|A:T|T:C|T:T|T:C|T:T|T:C|C:C|G:A|G:C|C:G|G:C|C:G|G:T|T:G|A:G|C:G|G:C|C:A|G:T|T:G|G:G|G:C|C:A|G:A|A:G|G:A|A:G|A:C|C:C|C:C|C:C|T
CauAC040	Zhenong501	Pop-1	China	Compact	C|C:T|T:C|A:A|T:C|T:G|T:C|C:A|A:A|A:A|A:A|A:C|T:T|T:C|C:C|T:T|T:C|G:G|A:T|T:C|C:G|G:G|C:T|C:A|G:G|G:G|T:C|C:G|G:T|T:G|G:G|G:T|T:G|A:T|A:C|G:A|A:A|G:A|A:A|A:C|T:C|T
CauAC041	Zhenong502	Pop-1	China	Compact	C|C:T|T:C|A:A|T:C|T:G|T:C|C:A|A:A|A:A|A:A|A:C|T:T|T:C|C:C|C:T|T:C|C:G|G:T|T:C|C:G|C:G|C:T|C:A|A:G|C:G|G:C|C:G|G:T|T:G|G:G|G:T|T:G|A:A|A:G|G:A|A:A|G:A|A:A|A:T|T:T|C
CauAC060	Madhu	Pop-1	China	Compact	C|C:C|C:A|A:A|T:C|T:T|T:A|A:A|A:A|A:G|A:T|A:T|T:T|T:C|T:T|T:C|C:C|G:G|G:C|C:G|G:G|C:C|G:T|T:G|A:G|C:G|G:T|C:A|A:G|G:G|G:A|A:C|T:A|A:A|T:C|C:G|G:A|A:A|A:C|C:C|T:T|T
CauAC063	Ps666	Pop-1	Thailand	Compact	C|C:C|T:C|A:A|T:C|T:G|T:A|C:T|A:G|A:G|A:T|A:C|T:A|T:C|C:T|T:C|C:C|G:G|A:T|C:C|G:C|C:C|G:C|T:A|G:C|G:G|G:C|T:G|A:G|G:G|G:A|A:T|C:A|A:A|A:G|G:A|G:G|A:A|C:A|C:C|C:C|T
CauAC069	Harsaram	Pop-1	Israel	Compact	C|C:C|T:A|C:A|A:C|C:G|T:A|A:T|A:A|A:A|A:T|A:C|T:A|T:C|C:C|C:T|C:C|C:A|A:C|T:G|C:C|G:G|G:T|T:G|G:G|G:G|G:C|T:A|G:T|T:G|G:G|G:C|C:G|A:T|T:G|C:G|G:G|A:A|A:C|C:C|C:T|T
CauAC070	Sango	Pop-1	India	Compact	C|C:T|C:C|C:T|T:C|T:T|T:A|C:A|A:A|A:A|A:A|A:C|C:T|T:C|C:T|T:C|C:C|C:G|A:T|T:C|C:C|C:G|G:T|T:A|G:C|C:T|T:C|C:A|A:T|T:G|G:A|A:T|T:A|G:A|T:C|G:G|G:A|A:A|A:C|A:T|C:C|C
CauAC072	Huierjia	Pop-1	China	Loose	C|G:T|T:A|A:T|A:T|C:T|G:C|A:A|T:A|G:A|G:A|T:T|T:A|A:C|C:T|T:C|C:G|C:A|G:T|T:C|C:C|G:C|C:C|C:G|A:G|C:T|T:C|C:G|A:T|T:G|G:A|A:C|T:A|G:T|T:G|G:G|G:A|A:A|A:A|C:C|C:C|T
CauAC092	Unknown	Pop-1	China	Loose	G|G:T|T:A|C:T|T:C|T:T|T:A|C:A|A:A|A:A|A:T|A:T|C:T|T:T|T:T|T:C|C:C|C:G|A:T|T:C|C:G|C:G|C:T|C:G|G:C|C:T|T:C|C:A|A:T|T:G|G:G|G:T|C:G|A:T|A:C|G:G|A:A|A:A|A:C|A:T|C:C|C
CauAC093	Zhenongsong50	Pop-1	China	Loose	C|C:T|T:C|C:T|T:T|C:T|T:A|A:A|A:G|G:A|A:A|A:T|T:A|A:C|C:T|T:T|T:C|C:A|A:T|T:C|C:C|C:C|C:C|C:A|A:C|C:T|T:C|C:A|A:G|G:G|G:A|A:C|C:G|G:T|T:C|C:A|A:A|A:A|A:C|C:T|T:C|C
CauAC094	Harsaram	Pop-1	Israel	Compact	C|C:T|T:C|C:A|A:C|C:G|G:A|A:T|T:A|A:A|A:A|A:C|C:A|T:C|C:T|T:T|T:C|C:A|A:T|C:C|G:C|C:G|G:T|T:G|G:G|G:T|G:C|C:A|A:T|T:G|G:A|A:C|C:G|G:T|T:G|G:G|G:G|G:A|A:A|C:C|C:T|T
CauAC104	Ig25	Pop-1	America	Compact	C|C:C|T:C|A:A|T:C|T:G|T:A|C:T|A:A|A:G|A:T|A:T|T:A|T:C|C:C|T:C|C:G|G:G|A:C|T:G|C:G|C:C|C:C|C:G|G:G|C:G|T:T|T:G|A:G|G:G|G:A|A:T|C:G|A:T|A:C|G:A|G:A|A:A|C:C|C:T|C:T|C
CauAC106	Snowmystique	Pop-1	America	Compact	C|C:C|T:C|A:A|T:C|T:G|T:A|C:T|A:G|A:G|A:T|A:C|T:A|T:C|C:T|T:C|C:C|G:G|A:T|C:C|G:C|C:C|G:C|T:A|G:C|G:G|G:C|T:G|A:G|G:G|G:A|A:T|C:A|A:A|A:G|G:A|G:G|A:A|C:A|C:C|C:C|T
CauAC107	Snowmuffin	Pop-1	America	Compact	G|G:T|T:C|C:A|A:C|C:G|T:C|C:A|A:A|A:A|A:A|A:C|T:A|A:C|C:C|C:C|C:C|C:G|G:T|T:C|C:G|G:G|C:T|C:A|A:C|C:G|T:C|C:G|G:T|T:G|G:G|G:T|T:A|G:A|A:G|C:A|G:G|G:A|A:A|A:C|T:T|T
CauAC110	Unknown	Pop-1	Swiss	Compact	C|C:C|T:A|A:T|T:C|T:T|T:A|A:A|A:G|A:A|A:A|A:C|T:A|T:T|T:T|T:T|T:C|C:G|A:T|C:C|G:G|C:C|C:C|C:A|G:C|C:T|T:C|C:A|G:T|T:G|G:G|G:T|T:G|G:A|A:C|G:A|A:A|A:C|C:C|C:C|T:T|C
CauAC114	1522	Pop-1	Swiss	Compact	C|C:C|T:A|A:T|T:C|T:T|T:A|A:A|A:G|A:A|A:A|A:C|T:A|A:T|T:T|T:T|T:C|C:G|A:T|C:C|G:G|C:C|C:C|C:A|G:C|C:T|G:C|C:A|G:T|T:G|G:G|G:T|C:G|G:A|A:C|G:A|A:A|A:C|C:C|C:C|T:T|C
CauAC121	Snowball	Pop-1	Abroad	Compact	C|C:C|T:A|A:A|T:C|T:G|T:A|A:T|A:A|A:A|A:A|T:C|T:T|A:C|C:T|T:C|C:C|G:G|G:T|T:C|C:C|C:G|C:T|C:G|G:G|G:G|T:C|C:A|A:T|T:G|G:G|G:T|T:A|G:A|A:C|G:A|A:A|A:A|A:C|C:C|C:C|T
CauAC122	Unknown	Pop-1	Unknown	Compact	C|C:C|C:A|C:A|A:C|C:G|T:A|A:T|A:A|A:A|A:T|A:T|T:T|T:C|C:C|C:C|C:C|C:A|A:C|C:G|G:C|C:G|G:T|T:G|A:G|G:G|T:C|C:A|G:T|T:G|G:G|G:C|C:G|G:T|T:G|G:G|G:G|G:A|A:C|A:T|T:C|T
CauAC128	Gayatri	Pop-1	India	Compact	C|C:C|T:C|C:T|T:C|T:T|T:A|A:A|A:A|A:A|A:A|A:T|T:T|T:C|C:T|T:C|C:C|C:A|A:C|C:G|G:C|C:G|G:T|T:G|G:C|C:T|T:C|C:A|A:T|T:G|G:A|A:T|T:G|G:T|T:C|G:G|G:A|A:A|A:C|A:T|C:T|C
CauAC131	Sb16	Pop-1	Abroad	Compact	C|C:C|C:A|A:A|A:C|C:G|T:A|A:T|A:A|A:G|A:A|T:T|T:T|T:C|C:T|T:C|C:C|C:A|A:T|T:C|C:G|G:G|C:T|C:G|A:G|G:G|G:C|C:A|A:G|G:C|C:G|G:C|T:A|G:A|T:G|G:G|G:G|A:A|A:C|C:C|T:T|T
CauAC132	Jkseed	Pop-1	India	Compact	C|C:C|C:A|A:A|T:C|T:G|G:A|A:A|T:A|A:A|G:A|A:T|T:T|T:T|C:T|T:C|C:C|C:A|A:T|T:C|C:G|G:G|G:T|T:A|G:C|G:G|G:C|C:A|A:T|T:G|G:G|G:T|T:G|G:T|T:G|G:G|G:A|A:A|A:C|C:T|T:T|T
CauAC133	Aghani	Pop-1	India	Compact	C|C:C|C:A|A:T|A:T|C:G|G:A|A:T|T:A|A:G|A:A|A:C|C:T|T:C|C:T|T:C|C:C|C:A|G:C|C:G|G:C|C:C|G:C|T:A|G:C|G:T|G:T|C:A|A:T|T:G|G:G|G:T|T:G|G:T|A:C|C:A|G:A|G:A|A:A|C:C|C:T|T
CauAC134	Katki	Pop-1	Europe	Compact	C|C:C|C:A|A:A|T:C|T:G|G:A|A:T|T:A|A:G|G:A|T:T|T:T|A:C|C:T|T:C|C:C|C:A|A:T|C:C|G:G|C:G|G:C|T:A|G:G|G:T|G:T|T:A|A:T|T:G|G:G|G:T|T:G|G:A|T:C|C:A|A:G|A:C|A:C|A:C|C:T|C
CauAC135	Himdaksh	Pop-1	India	Compact	C|C:T|T:C|C:T|T:C|T:T|T:A|A:A|A:A|A:A|A:A|A:T|T:T|T:C|C:T|T:C|C:C|C:G|A:T|T:C|C:C|G:C|C:C|C:G|G:G|C:T|T:C|C:A|A:T|T:G|G:A|A:T|T:A|G:A|T:G|C:G|G:A|A:A|A:A|C:C|T:C|C
CauAC136	Pawan	Pop-1	Japan	Compact	G|G:T|T:C|C:A|A:C|C:G|T:C|C:A|A:A|A:A|A:A|A:C|T:A|A:C|C:C|C:C|C:C|C:G|G:T|T:C|C:G|G:G|C:T|C:A|A:C|C:G|T:C|C:G|G:T|T:G|G:G|G:T|T:A|G:A|A:G|C:A|G:G|G:A|A:A|A:C|T:T|T
CauAC140	3Pie	Pop-1	India	Compact	G|G:C|T:C|A:A|T:C|T:T|T:A|A:T|A:A|A:A|A:T|A:C|T:T|T:C|C:T|T:C|C:G|C:A|G:T|C:C|G:G|C:C|G:C|T:A|A:C|C:T|T:C|C:A|A:T|T:G|G:A|A:C|T:G|A:T|A:C|C:G|G:A|A:A|C:A|C:C|T:C|C
CauAC143	Whitemarble	Pop-1	Japan	Compact	G|G:T|T:C|C:T|T:T|C:T|T:C|A:A|A:A|A:G|A:T|T:T|T:T|A:C|T:T|T:C|C:C|C:A|G:T|C:C|G:G|C:C|C:C|C:A|A:C|C:T|T:C|C:A|A:T|T:G|G:G|G:C|T:G|G:A|T:G|G:A|G:A|A:A|C:A|A:C|T:T|T
CauAC144	Svac	Pop-1	Japan	Compact	C|C:T|T:A|A:T|T:T|C:T|T:A|C:A|A:A|A:A|A:A|A:T|T:T|T:C|C:T|C:T|T:G|C:A|A:T|T:C|C:G|G:G|C:T|C:G|G:G|C:T|T:C|C:G|A:T|T:G|G:A|A:T|T:A|G:T|T:C|C:A|G:A|A:A|A:A|C:C|T:C|C
CauAC147	Unknown	Pop-1	Unknown	Compact	G|G:T|T:C|C:A|A:C|C:T|G:C|C:A|A:A|A:A|A:A|A:T|C:A|A:C|C:C|C:C|C:C|C:G|G:T|T:C|C:G|G:C|G:C|T:A|A:C|C:T|G:C|C:G|G:T|T:G|G:G|G:T|T:A|G:A|A:G|C:A|G:G|G:A|A:A|A:C|T:T|T
CauAC148	Unknown	Pop-1	Unknown	Compact	C|C:T|T:C|C:A|T:C|T:G|T:C|A:A|A:A|A:G|A:T|T:T|T:T|T:C|T:T|T:C|C:C|G:A|A:T|C:C|G:G|C:C|G:C|T:G|G:C|C:T|G:C|T:A|G:G|G:G|G:G|G:T|C:G|A:T|A:G|G:G|A:A|A:A|A:A|C:C|T:C|T
CauAC150	Unknown	Pop-1	Unknown	Compact	G|G:T|T:C|A:T|T:T|C:T|T:A|C:A|A:A|G:A|A:T|A:T|C:T|T:C|T:T|T:T|T:G|C:A|G:T|T:C|C:G|G:C|G:C|T:A|G:G|G:T|T:T|T:A|G:G|G:G|G:A|A:T|T:A|G:T|T:G|G:G|G:A|A:A|C:A|A:C|T:C|C
CauAC151	Unknown	Pop-1	Unknown	Compact	C|G:C|T:C|C:A|T:C|T:G|T:A|C:A|A:A|A:G|G:T|T:C|T:A|A:T|C:T|T:C|C:C|G:G|G:C|C:G|G:C|C:C|G:C|T:A|G:C|C:T|T:C|T:A|A:T|T:G|G:G|G:C|T:G|G:A|T:G|C:A|G:A|A:C|A:C|C:C|C:T|T
CauAC152	Unknown	Pop-1	Unknown	Compact	G|G:T|T:C|C:T|T:T|C:T|T:A|C:A|A:A|A:A|G:T|T:T|T:T|A:C|T:T|T:C|C:C|C:G|A:T|C:C|G:C|G:C|C:C|C:A|A:C|C:T|T:C|C:A|A:T|T:G|G:G|G:T|C:G|G:T|A:G|G:G|A:A|A:A|C:A|C:T|C:T|T
CauAC153	Unknown	Pop-1	Unknown	Compact	C|C:C|T:C|A:A|T:C|T:G|T:A|C:T|A:G|A:G|A:T|A:C|T:A|T:C|C:T|T:C|C:C|G:G|A:T|C:C|G:C|C:C|G:C|T:A|G:C|G:G|G:C|T:G|A:G|G:G|G:A|A:T|C:A|A:A|A:G|G:A|G:G|A:A|C:A|C:C|C:C|T
CauAC155	Unknown	Pop-1	Unknown	Compact	G|G:T|T:C|C:A|A:C|C:G|T:C|C:A|A:A|A:A|A:A|A:C|T:A|A:C|C:C|C:C|C:C|C:G|G:T|T:C|C:G|G:G|C:T|C:A|A:C|C:G|T:C|C:G|G:T|T:G|G:G|G:T|T:A|G:A|A:G|C:A|G:G|G:A|A:A|A:C|T:T|T
CauAC157	Unknown	Pop-1	Unknown	Compact	C|C:C|T:C|A:A|T:C|T:G|T:A|C:T|A:G|A:G|A:T|A:C|T:A|T:C|C:T|T:C|C:C|G:G|A:T|C:C|G:C|C:C|G:C|T:A|G:C|G:G|G:C|T:G|A:G|G:G|G:A|A:T|C:A|A:A|A:G|G:A|G:G|A:A|C:A|C:C|C:C|T
CauAC158	Unknown	Pop-1	Unknown	Compact	C|C:T|T:A|A:T|T:T|C:T|T:C|A:A|A:A|A:A|A:A|A:T|T:T|T:C|C:T|C:C|C:C|C:A|A:C|T:G|C:C|G:G|C:T|C:G|G:C|C:T|T:T|C:G|A:G|G:G|G:A|A:T|T:G|G:T|T:C|G:A|G:A|A:A|A:C|C:T|C:C|C
CauAC159	Unknown	Pop-1	Unknown	Compact	G|G:T|T:C|A:T|T:T|C:T|G:A|A:A|A:A|A:G|A:A|A:T|T:T|T:C|C:T|C:C|C:C|C:A|A:C|T:G|C:C|G:G|G:T|T:G|A:C|C:T|T:C|C:A|A:G|G:C|C:A|A:T|T:G|A:T|T:G|C:G|G:A|A:A|A:C|A:C|C:T|C
CauAC160	Unknown	Pop-1	Unknown	Compact	G|G:T|T:A|A:T|T:C|T:T|T:A|C:A|A:A|A:A|A:A|A:T|T:T|T:T|C:T|C:T|T:C|C:A|G:C|T:G|C:G|G:C|G:C|T:A|A:G|G:T|T:C|C:A|G:G|G:G|G:A|A:T|T:G|G:T|T:C|G:A|G:A|A:A|C:A|C:T|C:T|C
CauAC164	Unknown	Pop-1	Unknown	Compact	C|C:T|T:A|A:T|T:C|T:T|T:C|C:A|A:G|G:A|G:A|T:C|C:T|T:C|C:C|C:T|T:C|C:G|G:T|T:C|C:C|C:C|C:C|C:A|G:C|C:G|G:C|C:G|A:G|G:C|C:G|G:T|T:A|A:A|A:G|G:A|A:G|G:C|A:C|A:C|T:T|T
CauAC165	Unknown	Pop-1	Unknown	Compact	C|C:T|C:A|C:T|A:T|C:T|G:A|C:A|A:G|A:A|A:A|A:C|C:A|T:T|C:T|C:T|T:C|C:G|G:T|T:C|C:G|G:C|G:C|T:A|A:C|G:T|G:C|C:A|G:T|T:G|G:G|G:T|T:G|G:A|A:C|G:A|A:A|G:C|A:C|A:C|T:T|T
CauAC166	Unknown	Pop-1	Unknown	Compact	C|C:C|C:A|A:T|T:C|T:T|T:A|A:A|A:G|G:A|A:A|A:C|C:A|A:T|T:T|T:T|T:C|C:G|G:T|T:C|C:G|G:C|C:C|C:A|A:C|C:T|T:C|C:A|A:T|T:G|G:G|G:T|T:G|G:A|A:C|C:A|A:A|A:C|C:C|C:C|C:T|T
CauAC167	Unknown	Pop-1	Unknown	Compact	G|G:T|T:C|C:T|A:T|C:T|T:A|C:T|A:G|A:A|A:A|A:T|C:A|T:T|T:C|C:T|T:C|C:G|G:T|T:C|C:G|C:C|C:C|C:A|A:C|C:G|G:C|C:A|G:T|T:G|G:G|G:T|T:A|A:A|A:C|G:A|A:A|G:A|A:A|A:T|T:T|T
CauAC168	Unknown	Pop-1	Unknown	Compact	G|G:T|T:C|C:A|A:C|C:T|T:A|A:A|A:A|A:A|A:A|A:T|T:T|T:C|C:C|C:C|C:C|C:A|A:T|T:C|C:G|G:C|C:C|C:G|G:C|C:G|G:C|C:A|A:G|G:G|G:A|A:T|T:A|A:T|T:C|C:G|G:A|A:A|A:A|A:C|C:C|C
CauAC169	Unknown	Pop-1	Unknown	Compact	G|G:T|T:C|A:A|T:C|T:T|T:A|C:A|A:A|G:A|A:A|A:T|C:T|T:C|C:C|C:C|C:C|C:A|G:T|T:C|C:G|C:C|G:C|T:G|A:C|G:G|G:C|C:A|G:G|G:G|G:A|A:T|T:A|A:T|A:C|G:G|A:A|G:A|A:A|A:C|C:C|T
CauAC180	Shengfeng55	Pop-1	China	Compact	G|G:T|T:C|A:T|T:T|C:T|T:C|A:A|A:A|A:A|A:A|T:C|T:T|T:T|T:T|T:T|T:C|C:G|A:T|T:C|C:C|G:G|C:T|C:G|G:C|C:T|T:C|C:A|A:T|T:G|G:A|A:T|T:G|A:T|T:C|C:G|A:A|A:A|A:C|A:T|C:C|C
CauAC192	Jingzhuang	Pop-1	China	Compact	C|C:C|T:C|A:A|T:C|T:G|T:A|C:T|A:G|A:G|A:T|A:C|T:A|T:T|T:T|C:C|C:G|C:G|A:C|T:G|C:C|G:G|C:T|C:G|A:G|C:T|G:T|C:A|G:G|G:G|G:G|G:T|C:A|A:T|A:C|G:G|A:G|A:C|A:A|C:C|T:C|T
CauAC196	Shengsong70	Pop-1	China	Compact	G|G:T|T:A|A:T|T:C|T:T|T:C|C:A|A:G|G:A|A:A|A:C|C:T|T:C|C:C|C:T|C:C|C:G|G:T|T:C|C:C|C:C|C:C|C:A|A:C|C:G|G:C|C:G|G:G|G:C|C:A|A:T|T:A|A:A|A:G|G:A|A:G|G:A|A:A|A:T|T:T|T
CauAC197	Fumzle	Pop-1	China	Compact	C|C:C|T:A|A:A|T:C|T:G|T:A|A:T|A:G|A:G|A:T|A:C|T:A|T:T|C:T|T:C|T:G|C:A|A:C|T:G|C:C|G:G|C:T|C:G|A:G|C:G|T:T|C:G|A:T|T:G|G:G|G:C|C:A|G:A|T:G|C:A|G:A|G:A|C:C|A:T|C:T|C
CauAC208	Baiselianren	Pop-1	China	Compact	C|C:T|T:A|A:A|T:C|T:G|T:A|C:T|A:G|A:G|A:T|A:T|T:A|A:C|C:T|T:C|C:C|C:A|G:T|T:C|C:G|C:C|C:C|C:A|G:G|C:T|T:C|C:G|A:T|T:G|G:A|A:C|T:A|G:T|T:G|G:G|G:A|A:A|A:A|C:C|C:C|T
CauAC212	Fenghua60	Pop-1	China	Compact	G|G:T|T:A|C:T|T:T|C:T|G:C|C:A|A:A|A:A|A:A|A:T|C:T|T:C|T:C|T:C|C:C|C:G|A:C|T:G|C:G|C:C|C:C|C:A|A:G|C:T|G:C|C:A|A:G|G:G|G:A|A:T|T:G|A:T|A:G|C:G|G:A|A:C|A:A|A:T|C:C|C
CauAC217	Guanxue	Pop-1	Japan	Compact	G|G:T|T:C|A:A|T:C|T:G|T:C|C:A|A:A|G:A|G:T|T:T|C:T|T:T|C:T|T:C|C:G|C:A|G:C|C:G|G:C|C:G|G:T|T:G|A:G|C:G|G:C|C:A|G:T|T:G|G:G|G:C|C:G|A:A|A:G|G:A|A:A|G:C|C:C|C:C|C:T|C
CauAC218	Xiabao	Pop-1	China	Compact	G|G:T|T:C|C:A|T:C|T:T|T:A|C:T|A:G|A:G|A:T|A:T|C:T|T:T|T:T|T:C|C:G|C:A|G:C|C:G|G:C|C:G|C:T|C:G|A:G|C:G|T:C|C:A|A:T|T:G|G:G|G:T|C:A|A:A|A:G|G:A|A:A|A:C|C:C|C:C|T:T|T
CauAC219	Wudi	Pop-1	China	Compact	G|G:T|T:C|A:A|T:C|T:G|T:C|C:A|A:A|G:A|A:A|A:C|C:T|T:C|C:C|C:C|T:C|C:G|G:T|T:C|C:G|C:G|C:T|C:A|A:G|C:G|G:C|C:G|G:T|T:G|G:G|G:T|T:G|A:A|A:G|G:A|A:G|G:A|A:A|A:T|C:T|T
CauAC221	Taibaonaire	Pop-1	China	Compact	G|G:T|T:C|C:T|T:T|C:T|T:C|C:A|A:G|G:A|A:A|A:C|C:T|T:T|T:C|T:T|C:C|C:G|G:C|T:C|C:G|G:C|C:C|C:A|A:C|C:G|G:C|C:G|G:T|T:C|C:G|G:T|T:A|A:A|A:G|G:A|A:G|G:C|C:A|A:T|T:T|T
CauAC222	Ruixue	Pop-1	China	Compact	G|G:T|T:C|A:T|T:T|C:T|T:A|C:T|A:G|G:A|A:A|A:T|C:A|T:C|T:T|T:T|T:G|C:A|G:T|T:C|C:C|C:C|C:C|C:A|A:C|C:G|G:C|C:A|G:T|T:G|G:G|G:T|T:G|A:A|A:C|G:G|A:A|G:A|A:C|A:C|T:T|T
CauAC224	Yafei	Pop-1	China	Compact	C|C:C|T:C|A:A|T:C|T:G|T:A|C:T|A:G|A:G|A:T|A:C|T:A|T:C|C:T|T:C|C:C|G:G|A:T|C:C|G:C|C:C|G:C|T:A|G:C|G:G|G:C|T:G|A:G|G:G|G:A|A:T|C:A|A:A|A:G|G:A|G:G|A:A|C:A|C:C|C:C|T
CauAC225	Huaxue	Pop-1	China	Compact	C|C:T|C:A|C:T|A:T|C:T|G:C|A:A|T:A|G:A|G:A|T:T|C:T|A:C|C:T|T:C|C:G|C:A|G:C|T:G|C:C|C:G|C:T|C:G|A:G|C:G|G:T|C:A|G:G|G:G|G:A|A:C|T:A|A:A|A:G|G:G|A:A|G:C|A:C|A:C|C:T|C
CauAC226	Xingui	Pop-1	China	Compact	C|C:C|T:C|A:A|T:C|T:G|T:A|C:T|A:G|A:G|A:T|A:T|C:A|T:C|C:T|T:C|C:C|G:G|A:T|C:C|G:C|C:C|G:C|T:A|G:C|G:G|G:C|T:G|A:G|G:G|G:A|A:T|C:A|A:A|A:G|G:A|G:G|A:A|C:A|C:C|C:C|T
CauAC227	Chaojixueqiu	Pop-1	China	Compact	C|G:T|T:A|A:T|T:T|C:T|T:C|C:A|A:G|G:A|A:A|A:C|C:T|T:C|C:C|C:T|T:C|C:G|G:T|T:C|C:C|C:G|C:T|C:A|A:C|C:G|G:C|C:G|G:G|G:G|G:A|A:T|T:A|A:A|A:G|G:A|A:G|G:A|A:A|A:T|T:T|T
CauAC230	Fenghua60	Pop-1	China	Compact	G|G:T|T:A|C:T|T:T|C:T|G:C|C:A|A:A|A:A|A:A|A:T|C:T|T:C|T:C|T:C|C:C|C:A|G:T|C:C|G:G|C:C|C:C|C:A|A:G|C:T|G:C|C:A|A:G|G:G|G:A|A:T|T:G|A:T|A:G|C:G|G:A|A:C|A:A|A:T|C:C|C
CauAC231	Yunshan	Pop-1	China	Compact	G|G:T|T:C|C:T|A:T|C:T|G:C|C:A|A:A|G:A|G:A|T:C|T:T|A:T|C:T|C:C|C:G|C:A|G:C|T:G|C:C|G:C|G:C|T:G|A:G|C:G|G:C|C:A|G:T|T:G|G:G|G:C|T:A|G:A|A:G|G:A|A:A|G:C|A:C|A:C|T:T|T
CauAC233	Jinpin56	Pop-1	China	Compact	G|G:T|T:C|C:A|T:C|T:G|T:C|A:A|A:A|A:A|A:A|T:C|T:A|T:C|T:C|T:C|T:C|C:G|G:T|T:C|C:G|G:G|G:T|T:G|A:C|G:T|G:C|C:A|G:T|T:G|G:G|G:T|T:G|G:T|A:C|G:G|A:A|G:A|A:C|A:T|T:C|T
CauAC234	Jinpin66	Pop-1	China	Compact	G|G:T|T:C|C:A|A:C|C:T|G:C|C:A|A:A|A:A|G:A|T:C|T:T|A:T|C:T|C:C|C:G|C:A|G:C|T:G|C:C|G:G|G:T|T:G|A:G|C:G|G:C|C:A|G:T|T:G|G:G|G:C|T:G|A:A|A:G|G:A|A:A|G:C|A:C|A:C|T:T|T
CauAC235	Yinguan50	Pop-1	China	Compact	G|G:T|T:C|C:A|T:C|T:G|T:C|A:A|A:G|A:A|A:A|A:C|T:T|T:C|T:C|C:C|C:G|C:A|A:T|T:C|C:G|G:G|C:T|C:G|A:C|C:T|G:C|C:A|G:T|T:G|G:G|G:T|T:G|A:T|A:C|G:A|G:A|A:A|A:A|A:C|T:C|T
CauAC236	Yinguan60	Pop-1	China	Compact	G|G:T|T:C|A:A|T:C|T:T|T:A|C:T|A:A|G:A|A:A|A:T|C:T|T:C|C:C|C:C|C:C|C:A|G:T|T:C|C:G|C:C|G:C|T:G|A:C|C:G|G:C|C:A|G:G|G:G|G:A|A:T|T:A|A:T|A:C|G:G|A:A|G:A|A:C|A:C|C:T|C
CauAC238	Unknown	Pop-1	Unknown	Compact	G|G:T|T:A|C:T|T:T|C:T|T:C|A:A|A:A|A:A|A:A|T:C|T:T|T:T|T:T|T:C|C:C|C:A|G:T|T:C|C:C|G:C|G:C|T:G|G:C|C:T|T:C|C:A|A:T|T:G|G:G|G:C|T:A|G:A|T:G|C:A|G:A|A:A|A:A|C:C|T:C|C
CauAC239	Unknown	Pop-1	Unknown	Compact	G|G:T|T:C|A:T|T:T|C:T|T:C|A:A|A:A|A:A|A:A|T:C|T:T|A:T|T:T|T:C|C:C|C:G|A:T|C:C|G:G|C:G|G:T|T:G|G:C|C:T|T:C|C:A|G:G|G:G|G:G|G:T|C:G|A:T|A:C|G:G|A:A|A:A|A:A|C:C|T:C|C
CauAC244	Unknown	Pop-1	Unknown	Compact	G|G:T|T:A|A:T|T:C|T:T|T:C|C:A|A:G|G:A|A:A|A:C|C:T|T:C|C:C|C:T|T:C|C:G|G:T|T:C|C:C|C:G|G:T|T:A|A:G|G:G|G:C|C:G|G:G|G:G|G:A|A:T|T:A|A:A|A:G|G:A|A:G|G:A|A:A|A:C|C:T|T
CauAC245	Unknown	Pop-1	Unknown	Compact	G|G:T|T:C|C:A|T:C|T:G|T:C|A:A|A:A|A:A|A:A|T:C|T:A|T:T|C:T|C:T|T:C|C:G|G:T|T:C|C:G|G:G|G:T|T:G|A:C|G:T|G:C|C:A|G:T|T:G|G:G|G:T|T:G|G:T|A:C|G:G|A:A|G:A|A:C|A:T|T:C|T
CauAC250	Ruixueteda100	Pop-1	China	Compact	C|C:C|C:A|A:A|A:C|C:G|G:C|C:A|A:G|G:A|A:A|A:T|T:T|T:C|C:C|C:T|T:C|C:G|G:T|T:C|C:G|G:G|G:T|T:G|G:C|C:G|G:T|T:A|A:G|G:G|G:G|G:C|T:G|G:A|A:C|C:A|A:G|G:C|C:C|C:C|C:T|T
CauAC251	Baimawangzi	Pop-1	China	Compact	C|C:C|T:C|A:T|T:T|C:T|T:A|C:T|A:G|G:A|A:A|A:C|C:T|T:T|C:C|C:T|T:C|C:A|G:T|T:C|C:C|C:C|C:C|C:A|A:G|C:G|G:T|C:A|G:T|T:G|G:G|G:T|T:A|A:A|A:C|G:A|A:A|A:C|A:C|A:C|T:T|T
CauAC260	Ruixueteda120	Pop-1	China	Compact	C|C:C|C:A|A:A|A:C|C:G|G:C|C:A|A:G|G:A|A:A|A:T|T:T|T:C|C:C|C:T|T:C|C:G|G:T|T:C|C:G|G:G|G:T|T:G|G:C|C:G|G:T|T:A|A:G|G:G|G:G|G:C|C:G|G:A|A:C|C:A|A:G|G:C|C:C|C:C|C:T|T
CauAC261	Anyang100	Pop-1	China	Compact	C|C:T|T:C|A:T|T:T|C:T|G:A|A:T|T:G|G:A|G:A|T:C|C:T|T:T|C:T|T:C|C:C|C:G|A:T|T:C|C:C|C:G|C:T|C:A|A:C|C:G|G:C|C:A|G:T|T:G|C:G|G:C|T:A|A:A|A:G|G:A|A:A|G:A|C:C|A:T|C:T|T
CauAC262	Anyang120	Pop-1	China	Compact	C|C:T|C:A|A:T|T:T|C:T|G:C|A:A|T:G|G:A|G:A|T:C|C:T|T:C|C:T|T:C|C:C|C:A|A:T|T:C|C:C|C:C|G:C|T:A|A:C|G:G|G:C|T:G|G:T|T:G|G:G|G:T|C:A|A:A|A:G|C:A|A:A|G:C|C:C|C:C|C:T|T
CauAC275	Xuzhoukangre	Pop-1	China	Loose	C|C:T|C:A|C:T|A:T|C:T|T:C|C:A|T:A|G:A|A:A|A:T|C:T|T:C|T:T|T:T|T:G|G:A|A:T|T:C|C:C|G:G|C:T|C:G|A:G|C:G|T:T|T:G|G:T|T:G|G:A|A:T|T:A|A:T|T:G|C:G|A:A|A:A|A:C|C:C|T:C|T
CauAC278	Fukangsong	Pop-1	China	Loose	C|C:T|C:A|A:T|A:T|C:T|G:C|A:A|T:A|G:A|G:A|T:T|C:T|A:C|T:T|T:C|C:C|G:G|A:C|C:G|G:G|C:C|G:C|T:A|G:G|G:T|G:T|T:A|G:G|G:G|G:G|G:T|C:A|G:T|A:C|G:G|A:A|A:C|A:A|C:C|T:C|T
CauAC279	Xinqingsong55	Pop-1	China	Loose	C|C:C|T:C|C:A|T:C|T:G|T:A|A:A|A:G|A:G|A:T|A:T|C:T|A:C|C:T|T:C|C:C|G:A|A:C|T:G|C:C|G:G|C:T|C:A|G:C|C:T|T:C|C:A|A:T|T:G|G:A|A:T|T:A|G:A|T:G|G:A|G:A|A:A|A:C|C:T|C:T|C
CauAC285	Nantaiwan	Pop-1	China	Loose	C|C:T|C:C|C:T|A:T|C:T|G:A|A:A|T:A|G:A|G:A|T:T|C:T|A:C|C:T|T:C|C:G|C:A|G:C|T:G|C:C|G:G|C:T|C:G|A:C|C:T|G:C|C:A|A:T|T:G|G:A|A:T|T:A|G:A|T:G|G:A|G:A|A:A|C:C|C:T|C:T|C
CauAC288	Liangan52	Pop-1	China	Loose	G|G:T|T:C|A:T|T:T|C:T|T:A|C:A|A:A|A:A|A:A|A:T|T:T|T:C|C:T|C:T|T:G|G:A|G:T|T:C|C:G|G:C|C:C|C:A|A:C|C:G|T:C|C:G|G:T|T:G|G:A|A:T|T:G|A:T|T:G|G:G|G:A|A:A|C:C|C:T|T:C|C
CauAC289	Tailinaire	Pop-1	China	Loose	G|G:T|T:A|A:T|A:T|C:T|T:A|A:A|A:A|A:A|A:A|A:T|T:T|T:T|C:T|C:T|T:C|C:G|A:T|T:C|C:G|G:G|C:T|C:G|A:C|G:T|T:C|C:A|A:T|T:G|G:A|A:T|T:G|A:T|A:C|C:G|G:A|A:C|C:A|C:C|C:C|C
CauAC290	Taili55	Pop-1	China	Loose	C|C:C|T:C|C:A|T:C|T:G|T:A|A:A|A:G|A:G|A:T|A:T|C:T|A:C|C:T|T:C|C:C|G:A|A:C|T:G|C:C|G:G|C:T|C:A|G:C|C:T|T:C|C:A|A:T|T:G|G:A|A:T|T:A|G:A|T:G|G:A|G:A|A:A|A:C|C:T|C:T|C
CauAC291	Huierjiazaoshu	Pop-1	China	Loose	C|C:C|T:C|C:A|T:C|T:G|T:A|A:A|A:G|A:A|G:A|T:T|C:T|A:C|C:T|T:C|C:G|C:A|A:T|C:C|G:G|C:C|G:C|T:A|G:C|C:T|T:C|C:A|A:T|T:G|G:A|A:T|T:G|A:T|A:G|G:G|A:A|A:A|A:C|C:C|T:C|T
CauAC299	Meiyusong50	Pop-1	China	Loose	C|C:T|T:A|C:T|T:T|C:T|T:C|A:A|A:A|G:A|A:A|A:T|T:T|A:C|C:C|T:T|T:C|C:A|A:T|T:C|C:G|C:C|C:C|C:A|A:C|C:G|T:C|C:G|A:G|G:G|G:A|A:T|C:G|G:T|T:G|C:G|A:A|A:A|A:C|C:C|T:C|C
CauAC300	Taili65	Pop-1	China	Loose	C|C:T|C:C|C:T|A:T|C:T|G:A|A:A|A:G|G:A|G:A|T:T|C:A|A:C|C:T|T:C|C:C|G:G|A:T|C:C|G:C|C:G|G:T|T:A|G:C|G:T|G:C|T:A|G:T|T:G|G:A|A:T|C:A|G:A|A:G|G:A|A:A|G:A|C:C|C:C|C:T|C
CauAC307	Chunqing55	Pop-1	China	Loose	C|C:C|T:C|C:A|T:C|T:G|T:A|A:A|A:G|A:G|A:T|A:C|T:A|T:C|C:T|T:C|C:C|G:A|A:C|T:G|C:C|C:G|C:T|C:G|A:C|C:T|T:C|C:A|A:T|T:G|G:A|A:T|T:G|A:T|A:G|G:G|A:A|A:A|A:C|C:C|T:C|T
CauAC314	Qingsong65	Pop-1	China	Loose	C|C:C|T:C|C:A|T:C|T:G|T:A|A:A|A:G|A:G|A:T|A:C|T:A|T:C|C:T|T:C|C:C|G:A|A:C|T:G|C:C|G:G|C:T|C:A|G:C|C:T|T:C|C:A|A:T|T:G|G:A|A:T|T:A|G:A|T:G|G:A|G:A|A:A|A:C|C:T|C:T|C
CauAC315	Huamei55	Pop-1	China	Loose	C|C:T|C:C|C:T|A:T|C:T|G:A|A:A|A:A|G:A|A:A|A:T|T:T|T:C|C:C|T:C|C:G|G:A|A:T|T:C|C:G|C:C|C:C|C:A|G:C|C:G|T:C|T:G|A:T|T:G|G:A|A:T|T:A|G:T|T:C|G:G|G:A|A:A|A:C|C:T|C:T|C
CauAC316	Huamei60	Pop-1	China	Loose	C|C:C|T:C|A:A|T:C|T:G|T:A|C:A|A:G|G:A|A:A|A:T|T:T|A:C|C:T|T:C|C:G|C:A|A:T|T:C|C:C|C:C|C:C|C:G|A:C|C:T|G:C|C:A|A:T|T:G|G:A|A:T|C:G|G:T|T:G|C:G|G:A|A:A|A:C|C:C|C:C|T
CauAC329	Songmei65	Pop-1	China	Loose	C|C:T|T:C|C:T|A:T|C:T|G:A|A:A|A:A|A:A|A:A|A:C|T:A|T:C|C:T|T:C|C:G|G:A|A:C|T:C|C:G|G:C|C:T|C:G|G:C|C:T|T:C|C:A|A:T|T:G|G:A|A:T|T:A|A:A|A:G|G:A|A:A|A:A|A:C|C:C|C:T|T
CauAC002	Kesong108	Pop-2	China	Loose	C|C:C|C:A|A:A|T:C|T:G|G:A|A:T|T:G|A:G|G:T|T:C|T:A|A:T|C:T|T:C|T:G|C:A|A:C|C:G|G:C|G:G|C:T|C:G|A:G|C:G|T:T|C:G|G:T|T:C|C:G|G:C|C:A|G:A|T:G|C:A|G:A|G:A|C:C|C:T|C:T|C
CauAC025	Biyu100	Pop-2	China	Loose	C|C:C|C:A|A:A|T:C|T:G|G:A|A:T|T:G|A:G|G:T|T:C|T:A|A:T|C:T|T:C|T:G|C:A|A:C|C:G|G:C|G:G|C:T|C:G|A:G|C:G|T:T|C:G|G:T|T:C|C:G|G:C|C:A|G:A|T:G|C:A|G:A|G:A|C:C|C:T|C:T|C
CauAC026	Biyu108	Pop-2	China	Loose	C|C:C|C:A|A:T|A:T|C:G|G:A|A:T|T:A|G:G|G:T|T:T|C:A|A:C|T:T|T:T|C:C|G:A|A:C|C:G|G:G|C:C|G:C|T:A|G:C|G:T|G:C|T:G|G:T|T:C|C:G|G:C|C:G|A:T|A:C|G:G|A:G|A:C|A:C|C:C|T:C|T
CauAC038	Khyber	Pop-2	Abroad	Compact	C|C:T|C:C|C:A|A:C|C:G|G:C|A:A|T:A|A:A|G:A|T:C|C:A|A:C|T:C|T:C|C:C|C:G|G:T|C:C|G:G|G:G|G:T|T:A|G:G|G:G|G:C|C:G|G:T|T:G|G:G|G:T|C:G|A:A|A:G|C:A|G:G|A:A|C:A|C:T|T:T|C
CauAC039	Shumaila	Pop-2	Abroad	Compact	C|C:C|C:C|A:A|T:C|T:G|G:A|A:T|T:A|G:A|G:A|T:T|T:A|A:T|C:T|T:C|T:G|C:G|A:C|C:G|G:C|G:G|C:T|C:G|A:G|C:G|T:T|C:A|G:T|T:C|C:G|G:C|C:G|G:T|T:C|C:G|G:G|G:C|C:C|C:C|C:C|C
CauAC057	RD	Pop-2	India	Compact	C|C:C|C:C|A:A|T:C|T:G|G:A|A:T|T:A|G:G|G:T|T:T|T:A|A:T|C:T|T:C|C:C|G:A|G:C|C:G|G:C|C:G|G:T|T:A|G:C|G:T|G:C|C:G|G:T|T:C|C:G|G:C|C:G|G:T|T:C|C:G|G:G|G:C|C:C|C:C|C:C|T
CauAC058	Whitegoldsuper	Pop-2	India	Compact	C|C:C|C:A|A:T|T:C|T:G|G:A|A:T|T:A|A:G|G:T|T:T|T:A|A:C|C:T|T:T|T:C|C:A|A:C|C:G|G:G|G:C|C:C|C:A|A:C|C:T|T:C|C:G|G:T|T:C|C:A|A:C|C:G|G:T|T:C|C:G|G:G|G:C|C:C|C:C|C:C|C
CauAC059	Silverstone	Pop-2	America	Compact	C|C:C|C:C|A:A|A:C|C:G|G:A|A:T|T:A|A:A|A:A|A:T|T:A|A:C|C:T|T:T|T:C|C:G|G:C|C:G|G:G|G:G|G:T|T:A|A:G|G:T|T:C|C:G|G:T|T:C|C:A|A:C|C:G|G:T|T:C|C:G|G:G|G:C|C:C|C:C|C:T|T
CauAC061	Malini	Pop-2	Thailand	Compact	C|C:C|C:A|C:A|A:C|C:G|G:A|A:T|T:A|A:A|A:T|A:T|T:A|A:T|T:T|T:C|C:C|G:G|G:C|C:G|G:C|C:G|C:T|T:G|A:G|G:G|T:C|T:A|A:G|G:C|C:G|G:C|C:G|G:T|A:C|C:G|G:G|G:C|C:C|C:C|C:C|C
CauAC062	Num71	Pop-2	Thailand	Compact	C|C:C|C:C|A:A|A:C|C:G|G:A|A:T|T:A|A:A|A:A|T:T|T:A|A:T|T:T|T:C|C:G|C:G|G:C|C:G|G:C|C:G|C:T|T:G|A:G|G:G|T:C|T:A|A:G|G:C|C:G|G:C|C:G|G:T|A:C|C:G|G:G|G:C|C:C|C:C|C:C|C
CauAC065	Snowwhite	Pop-2	India	Compact	C|C:C|C:C|C:A|A:C|C:G|G:A|A:T|T:G|A:G|G:T|T:C|T:A|A:T|C:T|T:C|C:C|C:A|G:C|C:G|G:G|G:C|G:C|T:A|G:C|G:T|G:C|C:G|G:T|T:C|C:G|G:C|C:G|A:T|A:C|C:G|G:G|A:C|C:C|C:C|T:C|C
CauAC068	Madhvi	Pop-2	Japan	Compact	C|C:C|C:C|A:A|T:C|T:G|G:A|A:T|T:A|G:G|A:T|T:T|T:A|A:C|C:T|T:T|C:C|C:A|A:C|C:G|G:G|C:C|G:C|T:A|A:C|C:T|T:T|C:G|G:T|T:C|C:G|G:C|C:G|G:T|T:C|C:G|G:G|G:C|C:C|C:C|C:C|C
CauAC071	Menhir	Pop-2	India	Compact	C|C:C|C:C|C:A|A:C|C:G|G:A|A:T|T:A|A:G|A:T|A:T|T:A|A:C|T:T|T:T|C:C|G:A|G:C|C:G|G:G|C:C|G:C|T:A|G:G|G:G|G:C|T:A|G:T|T:G|G:G|G:C|C:G|G:T|T:C|C:G|G:G|G:C|A:C|A:C|T:C|C
CauAC073	Shumaila	Pop-2	Pakistan	Compact	C|C:C|C:C|A:A|T:C|T:G|G:A|A:T|T:A|G:A|G:A|T:T|T:A|A:T|C:T|T:C|T:G|C:G|A:C|C:G|G:C|G:G|C:T|C:G|A:G|C:G|T:T|C:A|G:T|T:C|C:G|G:C|C:G|G:T|T:C|C:G|G:G|G:C|C:C|C:C|C:C|C
CauAC074	Whitediamond	Pop-2	Pakistan	Compact	C|G:C|T:C|C:A|T:C|T:G|T:A|C:T|A:A|A:A|A:T|T:T|C:A|A:C|T:T|T:T|C:C|C:A|G:C|C:G|G:G|C:C|G:C|T:A|A:G|C:G|G:C|C:A|G:G|G:C|C:G|G:C|C:G|G:A|A:C|G:G|A:G|A:C|C:C|C:C|C:C|T
CauAC075	Llkkar585	Pop-2	Pakistan	Compact	C|G:C|T:C|C:A|T:C|T:G|T:A|C:T|A:A|A:A|A:T|T:T|C:A|A:C|T:T|T:T|C:C|C:A|G:C|C:G|G:G|G:C|G:C|T:A|A:G|C:G|T:C|C:G|A:T|T:C|C:G|G:C|C:G|G:A|A:C|G:G|A:G|A:C|C:C|C:C|C:C|T
CauAC076	Bony	Pop-2	Pakistan	Compact	C|C:C|C:C|A:A|T:C|T:G|G:A|A:T|T:A|G:A|A:A|T:T|T:A|A:T|C:T|T:C|C:G|C:G|A:C|C:G|G:C|C:C|G:C|T:A|G:G|C:G|T:T|C:A|G:T|T:C|C:G|G:C|C:G|G:T|T:C|C:G|G:G|G:C|C:C|C:C|C:C|C
CauAC077	Bianca	Pop-2	Pakistan	Compact	C|C:C|C:C|C:A|A:C|C:G|G:A|A:T|T:A|A:A|A:T|A:T|T:A|A:T|T:T|T:C|T:C|C:G|A:C|C:G|G:C|G:G|C:T|C:G|A:G|G:T|G:C|C:G|A:T|T:C|C:G|G:C|C:A|G:A|T:C|C:A|G:G|G:C|C:C|C:C|C:C|C
CauAC078	Ran1F1	Pop-2	Pakistan	Compact	C|C:C|C:C|C:A|A:C|C:G|G:A|A:T|T:A|A:A|G:A|T:T|C:A|T:T|C:T|T:C|C:G|C:A|G:C|C:G|G:C|G:G|C:T|C:G|G:G|G:G|T:T|C:G|A:T|T:C|C:G|G:C|C:A|A:A|T:G|C:A|A:A|G:C|C:C|C:T|C:C|C
CauAC079	Whitecastle	Pop-2	Pakistan	Compact	C|C:C|C:C|C:A|A:C|C:G|G:A|A:T|T:A|A:G|A:T|A:C|T:T|A:C|T:T|T:C|C:C|G:G|A:C|C:G|G:G|C:C|G:C|T:G|G:G|G:T|G:C|T:A|G:T|T:C|C:G|G:C|C:A|A:T|A:C|G:A|A:G|A:C|C:C|C:C|T:C|C
CauAC080	Ckd	Pop-2	Pakistan	Compact	C|C:C|T:C|A:A|T:C|T:G|T:A|C:T|A:G|A:G|A:T|A:T|C:A|T:C|T:T|T:C|C:G|C:G|G:C|T:G|C:C|G:G|C:T|C:G|A:G|C:G|G:C|C:G|G:T|T:C|C:G|G:C|T:A|G:A|A:G|G:A|A:G|A:C|C:A|C:T|T:T|T
CauAC081	Xuefulai	Pop-2	China	Compact	C|C:C|C:C|A:A|A:C|C:G|G:A|A:T|T:A|A:A|A:T|T:T|T:A|A:T|C:T|T:T|T:G|C:G|A:C|C:G|G:G|G:G|C:T|C:G|A:G|C:G|T:T|C:G|G:T|T:C|C:G|G:C|C:G|G:T|T:G|C:A|G:G|G:C|C:C|C:C|C:T|C
CauAC082	Xuebao006	Pop-2	Pakistan	Compact	C|C:C|C:C|C:A|A:C|C:G|G:A|A:T|T:A|G:G|G:T|T:T|T:A|A:T|C:T|T:C|C:C|C:A|A:T|C:C|G:C|G:C|C:C|C:A|A:G|C:G|T:C|C:G|G:T|T:C|C:G|G:C|C:G|G:A|T:C|C:G|G:G|G:C|C:C|C:C|C:C|C
CauAC083	Pari	Pop-2	Pakistan	Compact	C|C:C|C:C|A:A|T:C|T:G|G:A|A:T|T:A|G:A|G:A|T:T|T:A|A:T|C:T|T:C|T:G|C:G|A:C|C:G|G:C|G:G|C:T|C:G|A:G|C:G|T:T|C:A|G:T|T:C|C:G|G:C|C:G|G:T|T:C|C:G|G:G|G:C|C:C|C:C|C:C|C
CauAC084	Cashmere	Pop-2	Pakistan	Compact	C|G:C|T:C|A:A|T:C|T:G|T:A|C:T|A:A|A:A|A:A|T:T|T:A|A:T|T:T|T:C|C:G|C:G|G:C|C:G|G:C|C:C|C:C|C:A|G:G|C:G|G:T|T:A|A:G|G:C|C:G|G:C|C:G|G:T|A:C|G:G|A:G|A:C|C:C|C:C|C:C|T
CauAC085	Symphany	Pop-2	America	Compact	C|C:C|C:C|C:A|A:C|C:G|G:A|A:T|T:A|A:A|A:T|A:T|T:A|A:C|T:T|T:C|C:C|G:A|G:C|C:G|G:G|C:C|G:C|T:A|A:G|G:G|T:C|T:G|A:T|T:C|G:A|A:C|C:G|G:A|T:C|C:G|G:G|G:C|C:C|C:C|C:C|C
CauAC086	Summerflower	Pop-2	America	Compact	C|C:C|C:C|A:A|A:C|C:G|G:A|A:T|T:A|G:A|G:T|T:T|T:A|A:C|C:T|T:T|T:C|G:A|A:C|C:G|G:G|G:C|C:C|C:G|A:G|C:G|T:C|C:A|G:T|T:G|G:G|G:C|C:G|G:T|T:C|C:G|G:G|G:C|C:C|C:C|C:T|T
CauAC087	Unknown	Pop-2	Unknown	Compact	C|C:C|C:A|A:A|T:C|T:G|G:A|A:T|T:G|A:A|G:T|T:T|T:A|A:C|C:C|T:C|T:G|C:G|A:C|C:G|G:C|G:C|C:C|C:G|A:G|C:G|T:C|C:A|G:T|T:G|G:A|A:C|C:G|G:T|T:C|C:G|G:G|G:C|C:C|C:C|C:C|T
CauAC091	Taiwajnongqing	Pop-2	China	Loose	C|C:C|C:C|A:A|T:C|T:G|G:A|A:A|T:G|A:G|G:T|T:T|T:T|A:C|C:T|T:C|T:G|C:A|A:C|C:G|G:C|G:C|C:C|C:G|A:G|C:T|T:T|C:G|G:T|T:C|C:G|G:C|C:A|G:A|T:G|C:A|G:A|G:A|C:C|C:C|C:T|C
CauAC095	Mohini	Pop-2	India	Compact	C|C:C|C:A|A:T|T:T|C:G|G:A|A:T|T:G|G:A|G:T|T:T|T:A|A:T|T:T|T:C|C:C|G:G|G:C|C:G|G:G|G:G|C:T|C:G|A:G|C:G|T:C|C:A|G:T|T:C|C:G|G:C|C:G|G:T|T:C|C:G|G:G|G:C|C:C|C:C|C:C|C
CauAC096	Manvi	Pop-2	India	Compact	C|C:C|C:A|A:T|T:C|T:G|G:A|A:T|T:G|G:G|G:T|T:T|T:A|A:C|C:T|T:T|C:C|C:A|A:C|C:G|G:C|C:C|G:C|T:G|G:G|G:G|G:T|T:A|G:T|T:C|C:G|G:C|C:G|G:T|T:C|C:G|G:G|G:C|C:C|C:C|C:C|C
CauAC097	Girija	Pop-2	China	Compact	C|C:C|C:A|C:A|A:C|C:G|G:A|A:T|T:G|A:G|A:T|T:T|T:A|A:C|T:T|C:C|C:C|G:G|G:C|C:G|G:C|C:G|C:T|C:G|A:G|G:G|T:C|T:A|A:G|G:G|G:A|A:C|C:G|G:T|T:C|C:G|G:G|G:C|C:C|C:C|C:T|C
CauAC098	Juh	Pop-2	Europe	Compact	C|C:C|C:C|A:A|A:C|C:G|G:A|A:T|T:A|G:A|G:T|T:T|T:A|A:T|C:C|T:C|C:G|C:G|G:C|C:G|G:C|C:C|G:C|T:A|G:G|G:T|G:T|C:A|A:G|G:G|G:A|A:C|C:G|G:T|T:C|C:G|G:G|G:C|C:C|C:C|C:T|C
CauAC099	Jessica	Pop-2	Europe	Compact	C|C:C|C:C|C:A|A:C|C:G|G:A|A:T|T:A|G:A|G:T|T:T|T:A|A:T|C:T|T:C|T:C|C:A|A:C|C:G|G:G|G:C|C:C|C:A|A:G|G:T|G:C|C:G|G:T|T:C|C:G|G:C|C:G|G:T|A:C|C:G|G:G|G:C|C:C|C:C|C:C|C
CauAC101	Garunaa	Pop-2	France	Compact	C|C:C|C:C|A:A|T:C|T:G|G:A|A:T|T:G|G:G|A:T|T:T|T:A|A:T|T:T|T:C|C:C|C:A|G:C|C:G|G:G|C:C|G:C|T:A|G:C|G:T|G:C|T:G|A:T|T:C|C:G|G:C|C:A|G:T|T:C|C:G|G:G|G:C|C:C|C:C|C:T|C
CauAC102	Madhuri	Pop-2	France	Compact	C|C:C|C:A|C:T|A:T|C:G|G:A|A:T|T:A|G:G|G:T|T:T|T:A|A:C|T:T|T:T|C:C|G:A|G:C|C:G|G:G|C:C|G:C|T:A|G:C|G:T|G:C|T:G|A:T|T:C|C:G|G:C|C:G|G:T|T:C|C:G|G:G|G:C|C:C|C:C|C:T|C
CauAC103	Bunny	Pop-2	Unknown	Compact	C|C:C|C:C|A:A|T:C|T:G|G:A|A:T|T:A|G:A|A:A|T:T|T:A|A:T|C:T|T:C|C:G|C:G|A:C|C:G|G:C|C:C|G:C|T:A|G:G|C:G|T:C|T:G|A:T|T:C|C:G|G:C|C:G|G:T|T:C|C:G|G:G|G:C|C:C|C:C|C:C|C
CauAC105	Snowwaltz	Pop-2	America	Compact	C|C:C|C:A|A:T|A:T|C:G|G:A|A:T|T:A|G:G|G:T|T:T|T:A|A:C|T:T|T:T|C:C|G:A|G:C|C:G|G:G|C:C|C:C|T:A|A:C|G:T|G:C|T:A|G:T|T:G|G:G|G:C|C:G|A:T|T:C|C:G|G:G|G:C|C:C|C:C|C:C|T
CauAC108	Snowgrace	Pop-2	America	Compact	C|C:C|C:A|C:A|A:C|C:G|G:A|A:T|T:A|A:G|G:T|T:C|T:A|T:T|C:T|T:C|C:G|C:A|A:C|C:G|G:C|C:G|C:T|C:G|A:G|G:G|G:T|C:G|A:G|G:C|C:G|G:C|C:A|A:A|T:G|G:A|G:A|G:C|C:C|C:T|C:C|C
CauAC109	Snowcrown	Pop-2	America	Compact	C|C:C|C:C|A:A|A:C|C:G|G:A|A:T|T:A|A:A|G:T|T:T|C:A|T:T|C:T|T:C|C:G|C:G|A:C|C:G|G:C|C:C|C:C|C:G|G:G|G:G|G:T|C:A|G:G|G:C|C:G|G:C|C:G|A:T|A:C|G:G|A:A|A:C|C:C|C:T|C:T|C
CauAC111	Suhasini	Pop-2	Swiss	Compact	C|C:C|C:C|C:A|A:C|C:G|G:A|A:T|T:A|G:A|A:A|A:T|T:A|A:T|C:T|C:C|C:G|C:G|G:C|C:G|G:C|G:G|G:T|T:A|A:G|G:T|T:T|C:A|A:T|T:C|C:G|G:C|C:G|G:T|T:C|C:G|G:G|G:C|C:C|C:C|C:C|C
CauAC112	Tetris	Pop-2	Swiss	Compact	C|C:C|C:C|A:A|A:C|C:G|G:A|A:T|T:A|G:A|G:A|T:T|T:A|A:T|C:T|C:C|T:G|C:G|G:C|C:G|G:C|G:G|C:T|C:A|A:G|G:T|T:T|C:A|A:T|T:G|G:A|A:C|C:G|G:T|T:C|C:G|G:G|G:C|C:C|C:C|C:C|C
CauAC113	Luck	Pop-2	Swiss	Compact	C|C:C|C:C|A:A|T:C|T:G|G:A|A:T|T:G|A:G|G:T|T:T|T:A|A:C|C:T|T:C|T:C|C:A|A:C|C:G|G:G|G:C|G:C|T:A|A:G|G:T|T:C|T:A|A:G|G:C|C:G|G:C|C:G|G:T|T:C|C:G|G:G|G:C|C:C|C:C|C:C|C
CauAC115	Lf6697	Pop-2	Thailand	Compact	C|C:C|C:A|C:T|A:T|C:G|G:A|A:T|T:G|A:A|A:T|A:T|T:A|A:C|T:T|T:C|C:C|G:A|G:C|C:G|G:C|C:G|C:T|C:G|A:G|C:G|T:T|C:A|G:T|T:C|C:G|G:C|C:G|G:T|T:C|C:G|G:G|G:C|C:C|C:C|C:C|C
CauAC116	Lf6445	Pop-2	Thailand	Compact	C|C:C|C:C|A:A|A:C|C:G|G:A|A:T|T:G|A:G|A:T|T:T|T:A|A:C|T:T|C:C|C:C|G:G|G:C|C:G|G:C|C:G|C:T|C:G|A:G|G:G|T:C|T:A|A:G|G:G|G:A|A:C|C:G|G:T|T:C|C:G|G:G|G:C|C:C|C:C|C:C|T
CauAC117	Unknown	Pop-2	Unknown	Compact	C|C:C|C:A|A:T|T:C|T:G|G:A|A:T|T:A|A:G|G:T|T:T|T:A|A:C|C:T|T:T|T:C|C:A|A:C|C:G|G:G|G:C|C:C|C:A|A:C|C:T|T:C|C:G|G:T|T:C|C:A|A:C|C:G|G:T|T:C|C:G|G:G|G:C|C:C|C:C|C:C|C
CauAC118	Sungro	Pop-2	Abroad	Compact	C|C:C|C:A|A:A|A:C|C:G|G:A|A:T|T:A|A:A|A:A|A:T|T:A|A:C|C:T|T:T|T:C|C:G|G:C|C:G|G:G|G:G|G:T|T:A|A:G|G:T|T:C|C:G|G:T|T:C|C:A|A:C|C:G|G:T|T:C|C:G|G:G|G:C|C:C|C:C|C:T|T
CauAC119	Global	Pop-2	Abroad	Compact	C|C:C|C:C|C:A|A:C|C:G|G:A|A:T|T:A|A:A|A:A|A:T|T:A|A:T|T:T|T:C|C:C|C:G|G:T|C:C|G:G|C:G|G:T|T:G|G:G|G:T|T:C|C:G|G:T|T:C|C:G|G:C|C:A|A:T|T:C|C:G|G:G|G:C|C:C|C:C|C:C|C
CauAC120	Doctor	Pop-2	Abroad	Compact	C|C:C|C:C|A:A|T:C|T:G|G:A|A:T|T:G|A:G|G:T|T:T|T:A|A:C|C:T|T:T|T:C|G:G|G:C|C:G|G:C|C:C|G:C|T:A|G:G|C:G|T:C|T:G|A:T|T:C|C:G|G:C|C:G|G:T|T:C|C:G|G:G|G:C|C:C|C:C|C:T|T
CauAC123	Whitesharp	Pop-2	Abroad	Compact	C|C:C|C:C|C:A|T:C|T:G|G:A|A:T|T:G|A:G|G:T|T:T|T:A|A:C|T:T|T:C|C:C|C:G|G:C|C:G|G:C|G:G|C:T|C:G|G:G|G:G|G:C|C:A|A:T|T:G|G:A|A:C|C:A|G:T|T:G|C:G|G:G|G:C|C:C|C:T|C:T|C
CauAC124	Moonlight	Pop-2	Abroad	Compact	C|C:C|C:A|A:T|T:C|T:G|G:A|A:T|T:A|A:G|G:T|T:T|T:A|A:C|C:T|T:T|T:C|C:A|A:C|C:G|G:G|G:C|C:C|C:A|A:C|C:T|T:C|C:G|G:T|T:C|C:A|A:C|C:G|G:T|T:C|C:G|G:G|G:C|C:C|C:C|C:C|C
CauAC125	Kalapatta	Pop-2	Abroad	Compact	C|C:C|C:C|C:T|A:T|C:G|G:A|A:T|T:A|G:A|G:T|T:T|T:A|A:C|C:T|T:C|C:C|C:G|G:C|C:G|G:G|G:G|C:T|C:A|A:C|C:G|T:T|C:A|A:T|T:C|C:A|A:C|C:G|G:T|T:C|C:G|G:G|G:C|C:C|C:C|C:T|C
CauAC126	Madhvi	Pop-2	India	Compact	C|C:C|C:C|A:A|A:C|C:G|G:A|A:T|T:A|G:A|G:T|T:T|T:A|A:T|T:C|T:C|C:G|C:G|G:C|C:G|G:C|C:C|G:C|T:A|G:G|G:T|G:C|T:A|A:G|G:G|G:A|A:C|C:G|G:T|T:C|C:G|G:G|G:C|C:C|C:C|C:T|C
CauAC127	Nbh	Pop-2	Europe	Compact	C|C:C|C:A|C:T|A:T|C:G|G:A|A:T|T:A|A:A|A:T|A:T|T:A|A:T|T:T|T:C|C:C|G:G|G:C|C:G|G:C|C:G|C:T|C:G|A:G|G:G|T:T|C:A|A:T|T:C|C:A|A:C|C:G|G:A|T:C|C:G|G:G|G:C|C:C|C:C|C:C|T
CauAC129	Vikas	Pop-2	Europe	Compact	C|C:C|C:A|A:T|T:T|C:G|G:A|A:T|T:A|G:G|G:T|T:T|T:A|A:C|C:T|T:T|C:C|G:A|A:C|C:G|G:G|G:C|C:C|C:G|A:C|G:T|G:T|C:A|A:T|T:C|G:G|G:C|C:G|G:T|T:C|C:G|G:G|G:C|C:C|C:C|C:C|C
CauAC130	Spring	Pop-2	Abroad	Compact	C|C:C|C:C|C:T|T:C|T:G|G:A|A:T|T:A|A:G|G:T|T:T|T:A|A:C|C:C|C:C|C:C|C:G|G:T|T:C|C:C|C:C|C:C|C:G|G:G|G:G|G:C|C:G|G:T|T:C|C:G|G:T|T:G|G:T|T:G|G:G|G:G|G:C|C:C|C:T|T:C|C
CauAC137	Cashmere	Pop-2	Japan	Compact	C|C:T|C:A|C:T|A:T|C:T|G:C|A:A|T:A|A:A|A:T|A:T|T:A|A:T|T:T|T:C|C:C|G:G|G:C|C:G|G:C|C:C|C:C|C:G|A:C|G:G|G:T|T:A|A:G|G:C|C:G|G:C|C:G|G:A|T:G|C:A|G:A|G:C|C:C|C:C|C:T|C
CauAC138	Barkha	Pop-2	China	Compact	C|C:C|T:C|A:A|T:C|T:G|T:A|C:T|A:G|A:G|A:T|T:T|T:T|A:C|T:T|T:C|C:G|C:G|G:C|T:G|C:C|G:G|C:T|C:A|A:C|G:G|T:T|T:A|A:G|G:C|C:A|A:T|C:A|G:T|T:C|C:G|G:A|G:A|C:C|C:C|C:T|C
CauAC139	Barkha	Pop-2	China	Compact	C|C:T|C:A|C:T|A:T|C:T|G:C|A:A|T:A|G:A|G:T|T:T|T:A|T:T|C:T|T:C|C:G|C:G|G:C|T:G|C:C|G:G|C:T|C:A|A:C|G:G|T:T|T:A|A:G|G:C|C:A|A:C|T:G|A:T|T:C|C:G|G:G|A:C|A:C|C:C|C:C|T
CauAC141	Lucky	Pop-2	Swiss	Compact	C|C:C|C:A|C:T|A:T|C:G|G:A|A:T|T:G|A:A|G:T|T:T|T:A|A:C|C:T|T:C|T:C|C:A|A:C|C:G|G:G|G:C|G:C|T:A|G:G|G:T|T:C|T:A|A:G|G:C|C:G|G:C|C:G|G:T|T:C|C:G|G:G|G:C|C:C|C:C|C:C|C
CauAC142	Girija	Pop-2	China	Compact	C|C:C|C:C|A:A|A:C|C:G|G:A|A:T|T:A|G:A|G:T|T:T|T:A|A:T|C:C|T:C|C:G|C:G|G:C|C:G|G:C|C:C|G:C|T:A|G:G|G:T|G:T|C:A|A:G|G:G|G:A|A:C|C:G|G:T|T:C|C:G|G:G|G:C|C:C|C:C|C:C|T
CauAC145	Madhuri	Pop-2	France	Compact	C|C:C|C:A|C:T|A:T|C:G|G:A|A:T|T:G|G:A|G:T|T:T|T:A|A:T|C:T|T:C|T:C|C:G|A:C|C:G|G:C|G:G|C:T|C:G|A:G|C:G|T:T|C:A|G:T|T:C|C:G|G:C|C:G|G:T|T:C|C:G|G:G|G:C|C:C|C:C|C:C|T
CauAC146	Naturebest	Pop-2	America	Compact	C|C:C|C:C|A:A|T:C|T:G|G:A|A:T|T:A|G:A|A:A|T:T|T:A|A:T|C:T|T:C|C:G|C:G|A:C|C:G|G:C|C:C|G:C|T:A|G:C|G:T|G:C|T:G|A:T|T:C|C:G|G:C|C:G|G:T|T:C|C:G|G:G|G:C|C:C|C:C|C:C|C
CauAC149	Unknown	Pop-2	Unknown	Compact	C|C:C|C:A|C:T|A:T|C:G|G:A|A:T|T:G|A:A|A:T|A:T|T:A|A:C|T:T|T:C|C:C|G:A|G:C|C:G|G:C|C:G|C:T|C:G|A:G|C:G|T:T|C:A|G:T|T:C|C:G|G:C|C:G|G:T|T:C|C:G|G:G|G:C|C:C|C:C|C:C|C
CauAC154	Unknown	Pop-2	Unknown	Compact	C|C:C|C:C|C:A|A:C|C:G|G:A|A:T|T:G|A:A|A:A|A:T|T:A|A:C|T:C|T:C|C:C|G:G|G:C|C:G|G:G|C:G|G:T|T:A|A:G|G:T|T:C|T:A|A:T|T:C|C:G|G:C|C:G|G:T|T:C|C:G|G:G|G:C|C:C|C:C|C:C|C
CauAC156	Unknown	Pop-2	Unknown	Compact	C|C:C|C:C|A:A|T:C|T:G|G:A|A:T|T:A|G:A|A:A|T:T|T:A|A:T|C:T|T:C|C:G|C:G|A:C|C:G|G:C|C:G|C:T|C:G|A:G|C:G|T:T|C:A|G:T|T:C|C:G|G:C|C:G|G:T|T:C|C:G|G:G|G:C|C:C|C:C|C:C|C
CauAC161	Unknown	Pop-2	Unknown	Compact	C|C:C|C:C|C:A|A:C|C:G|G:A|A:T|T:G|A:G|G:T|T:C|T:A|A:T|C:T|T:C|C:C|C:A|G:C|C:G|G:G|G:C|G:C|T:A|G:C|G:T|G:C|C:G|G:T|T:C|C:G|G:C|C:G|A:T|A:C|C:G|G:G|A:C|C:C|C:C|T:C|C
CauAC162	Unknown	Pop-2	Unknown	Compact	C|C:C|T:C|A:A|T:C|T:G|T:A|C:T|A:G|A:G|A:T|A:T|C:A|T:C|T:T|T:C|C:G|C:G|G:C|T:G|C:C|G:C|C:C|C:G|A:G|C:G|G:C|C:G|G:T|T:C|C:G|G:C|T:G|A:A|A:G|G:A|A:A|G:C|C:C|A:T|T:T|T
CauAC163	Unknown	Pop-2	Unknown	Compact	C|C:C|T:C|A:A|T:C|T:G|T:A|C:A|A:G|A:G|A:T|A:T|C:A|T:C|T:T|T:C|C:C|C:G|G:T|C:C|C:G|C:G|C:T|C:G|A:G|G:G|G:C|C:G|A:T|T:C|C:G|G:C|C:A|A:A|A:G|G:A|A:G|G:C|C:A|C:T|C:T|C
CauAC170	Unknown	Pop-2	Unknown	Compact	C|C:C|T:A|C:T|T:C|T:G|T:A|C:T|A:G|A:G|A:T|A:T|C:A|A:T|T:T|T:C|C:C|G:G|G:T|T:C|C:G|G:G|G:T|T:G|G:G|C:G|G:C|T:A|A:T|T:G|G:G|G:C|T:G|A:A|A:C|C:G|G:A|A:C|C:C|A:T|T:T|T
CauAC185	Shengfeng95	Pop-2	China	Loose	C|C:C|C:A|C:A|A:C|C:G|G:A|A:T|T:G|A:G|A:T|T:C|T:T|A:C|T:T|T:C|C:C|C:A|G:T|C:C|G:C|C:C|G:C|T:A|G:G|G:G|G:C|T:A|G:T|T:C|C:G|G:C|C:G|A:T|A:C|G:G|G:A|G:C|A:C|A:C|T:T|T
CauAC186	Suesong95	Pop-2	China	Loose	C|C:C|C:C|A:A|T:C|T:G|G:A|A:A|T:G|A:G|G:T|T:T|T:T|A:C|C:T|T:C|T:G|C:A|A:C|C:G|G:C|G:C|C:C|C:G|A:G|C:T|T:T|C:G|G:T|T:C|C:G|G:C|C:A|G:A|T:G|C:A|G:A|G:A|C:C|C:C|C:T|C
CauAC194	Sueyumei108	Pop-2	China	Loose	C|C:C|C:A|A:T|A:T|C:G|G:A|A:T|T:A|G:G|G:T|T:T|C:A|A:C|T:T|T:T|C:C|G:A|A:C|C:G|G:G|C:C|G:C|T:A|G:C|G:T|G:C|T:G|G:T|T:C|C:G|G:C|C:G|A:T|A:C|G:G|A:G|A:C|A:C|C:C|T:C|T
CauAC198	Zhunong80	Pop-2	China	Loose	C|C:C|C:A|A:A|T:C|T:G|G:A|A:T|T:G|A:G|G:T|T:C|T:A|A:T|C:T|T:C|T:G|C:G|A:C|C:G|G:C|G:G|C:T|C:G|A:G|C:G|T:T|C:G|G:T|T:C|C:G|G:C|C:A|G:A|T:G|C:A|G:A|G:A|C:C|C:T|C:T|C
CauAC199	Zhunong106	Pop-2	China	Loose	C|C:C|C:A|A:T|A:T|C:G|G:A|A:T|T:A|G:G|G:T|T:T|C:A|A:C|T:T|T:T|C:C|G:A|A:C|C:G|G:G|C:C|G:C|T:A|G:C|G:T|G:C|T:G|G:T|T:C|C:G|G:C|C:G|A:T|A:C|G:G|A:G|A:C|A:C|C:C|T:C|T
CauAC201	Jixiangsong	Pop-2	China	Loose	C|C:C|C:C|C:A|A:C|C:G|T:A|A:T|A:A|A:G|A:T|T:C|C:A|T:T|C:T|T:C|C:G|C:G|G:C|C:G|G:C|G:G|G:T|T:G|G:G|G:G|G:C|C:A|G:T|T:G|G:G|G:C|C:G|A:T|A:C|C:A|G:A|A:C|C:C|A:T|C:T|C
CauAC205	Songhua654	Pop-2	China	Loose	C|C:C|C:A|A:T|A:T|C:G|G:A|A:T|T:A|G:G|G:T|T:T|C:A|A:C|T:T|T:T|C:C|G:A|A:C|C:G|G:G|C:C|G:C|T:A|G:C|G:T|G:C|T:G|G:T|T:C|C:G|G:C|C:G|A:T|A:C|G:G|A:G|A:C|A:C|C:C|T:C|T
CauAC206	Qingnong92	Pop-2	China	Loose	C|C:C|C:C|A:A|T:C|T:G|G:A|C:A|A:G|A:G|G:T|T:T|T:T|A:C|C:T|T:C|C:G|C:A|A:C|C:G|G:C|G:G|C:T|C:G|G:G|C:G|T:T|T:G|G:T|T:C|C:G|G:C|C:A|G:A|T:G|C:A|G:A|G:A|C:C|C:C|C:T|T
CauAC211	Xuebao	Pop-2	Japan	Loose	C|C:C|C:C|C:A|A:C|C:G|G:A|A:T|T:A|G:G|G:T|T:T|C:A|A:C|T:T|T:C|C:C|C:G|A:C|C:G|G:G|G:G|C:T|C:G|A:G|C:G|T:C|C:G|G:T|T:C|C:G|G:C|C:A|G:A|T:C|C:G|G:A|G:C|C:C|C:T|C:C|C
CauAC214	Fuqiang	Pop-2	China	Loose	C|C:C|C:C|A:A|A:C|C:G|G:A|A:T|T:A|G:G|G:T|T:T|T:A|A:C|C:C|T:C|C:C|G:A|G:C|C:G|G:C|G:C|C:C|C:A|A:G|G:G|G:T|C:G|A:T|T:G|G:G|G:C|C:G|G:T|T:C|C:G|G:G|G:C|C:C|C:C|C:C|T
CauAC215	Dashun	Pop-2	Japan	Compact	C|C:C|T:A|A:T|T:C|T:G|T:A|A:T|A:G|A:G|A:T|T:T|T:A|A:C|C:T|T:C|C:C|C:A|A:C|C:G|G:G|G:C|C:C|C:A|A:G|G:T|G:C|C:A|G:G|G:C|C:G|G:C|T:G|A:T|A:C|G:A|A:A|G:A|C:A|C:C|T:C|T
CauAC216	Xuebao006	Pop-2	Japan	Compact	C|C:C|C:C|C:A|A:C|C:G|G:A|A:T|T:G|A:G|G:T|T:T|T:A|A:C|T:T|T:C|C:C|C:A|A:C|T:G|C:G|C:C|C:C|C:A|A:C|G:T|G:C|C:G|G:T|T:C|C:G|G:C|C:G|G:A|T:C|C:G|G:G|G:C|C:C|C:C|C:C|C
CauAC220	Xuefei	Pop-2	Japan	Compact	C|C:C|C:C|A:A|A:C|C:G|G:A|A:T|T:A|G:A|A:A|T:T|T:A|A:T|C:T|C:C|T:G|C:G|G:C|C:G|G:C|G:C|G:C|T:A|A:G|G:T|T:T|C:A|A:T|T:G|G:A|A:C|C:G|G:T|T:C|C:G|G:G|G:C|C:C|C:C|C:C|C
CauAC223	Xueling	Pop-2	China	Compact	C|C:C|C:C|C:A|A:C|C:G|G:A|A:T|T:A|G:G|G:T|T:T|C:A|A:C|T:T|T:C|C:C|C:G|A:C|C:G|G:G|G:G|C:T|C:G|A:G|C:G|T:C|C:G|G:T|T:C|C:G|G:C|C:A|G:A|T:C|C:G|G:A|G:C|C:C|C:T|C:C|C
CauAC228	Taiguonaire	Pop-2	China	Compact	C|C:T|C:A|C:T|A:T|C:T|G:C|A:A|T:A|G:A|G:A|T:C|T:T|A:T|C:T|T:C|C:C|G:G|G:T|C:C|G:G|C:C|C:C|C:A|G:C|G:G|G:C|C:G|G:T|T:C|C:G|G:T|C:A|G:A|A:G|G:A|A:G|A:C|C:A|C:T|T:T|T
CauAC229	Yinguan	Pop-2	China	Compact	C|C:C|T:A|C:T|T:T|C:T|G:C|A:A|T:A|G:A|G:A|T:C|T:A|A:T|T:T|T:C|C:G|C:G|G:T|T:C|C:G|G:G|G:T|T:G|G:C|G:G|G:T|C:A|A:T|T:G|G:G|G:T|C:A|G:A|A:C|C:G|G:A|A:C|C:A|C:T|T:T|T
CauAC232	Jinxue88	Pop-2	China	Compact	C|C:C|C:C|C:A|A:C|C:G|T:A|A:T|A:A|A:G|A:T|T:C|C:A|T:T|C:T|T:C|C:C|G:G|A:C|C:G|G:G|C:G|G:T|T:G|G:G|G:G|G:C|C:G|A:T|T:G|G:G|G:C|C:A|G:A|T:C|C:G|A:A|A:C|C:A|C:T|C:T|C
CauAC237	Yinguan80	Pop-2	China	Compact	C|C:C|T:A|C:T|T:T|C:T|G:C|A:A|T:A|G:A|G:A|T:C|T:A|A:T|T:T|T:C|C:G|C:G|G:T|T:C|C:G|G:G|G:T|T:G|G:C|G:G|G:T|C:A|A:T|T:G|G:G|G:T|C:A|G:A|A:C|C:G|G:A|A:C|C:A|C:T|T:T|T
CauAC247	Unknown	Pop-2	Unknown	Compact	C|C:C|C:C|C:A|A:C|C:G|G:A|A:T|T:A|A:G|A:T|T:T|T:A|A:C|T:T|T:T|C:C|C:A|G:C|C:G|G:G|C:C|C:C|C:A|A:G|C:G|T:C|C:G|G:T|T:C|C:G|G:C|C:A|G:A|T:C|C:G|G:G|G:C|C:C|C:C|C:C|C
CauAC248	Jinhuanghou	Pop-2	China	Compact	C|C:C|C:C|C:A|A:C|C:G|G:A|A:T|T:A|A:A|A:T|A:T|T:A|A:C|C:T|T:C|C:C|C:A|A:C|T:G|C:G|C:C|C:C|C:A|A:G|G:G|G:C|C:G|G:T|T:C|C:G|G:C|C:G|G:T|T:C|C:G|G:G|G:C|C:C|C:C|C:C|C
CauAC249	Ziguan	Pop-2	China	Compact	C|C:C|C:C|C:A|A:C|C:G|G:A|A:T|T:A|A:G|G:T|T:C|C:A|A:C|C:T|T:C|C:C|C:G|G:C|C:G|G:C|C:C|C:C|C:A|A:G|G:G|G:C|C:A|A:T|T:C|C:G|G:C|C:G|G:T|T:C|C:G|G:G|G:C|C:C|C:C|C:C|C
CauAC252	Fuxing80	Pop-2	China	Compact	C|C:T|C:C|A:T|T:C|T:G|T:A|C:T|A:G|A:G|A:T|A:T|C:A|A:T|T:T|T:C|C:C|G:G|G:T|T:C|C:G|G:G|G:T|T:G|G:G|C:G|G:C|T:A|A:T|T:G|G:G|G:C|T:G|A:A|A:C|C:G|G:A|A:C|C:C|A:T|T:T|T
CauAC253	Xuebao	Pop-2	China	Compact	C|C:C|C:C|C:A|A:C|C:G|G:A|A:T|T:A|G:G|G:T|T:T|C:A|A:C|T:T|T:C|C:C|C:G|A:C|C:G|G:G|G:G|C:T|C:G|A:G|C:G|T:C|C:G|G:T|T:C|C:G|G:C|C:A|G:A|T:C|C:G|G:A|G:C|C:C|C:T|C:C|C
CauAC254	Xinyi100	Pop-2	China	Compact	C|C:C|T:C|A:A|T:C|T:G|T:A|C:T|A:G|A:G|A:T|A:T|C:A|T:C|T:T|T:C|C:C|C:G|G:C|T:G|C:C|G:G|C:T|T:G|A:G|G:G|G:T|C:G|A:T|T:G|G:G|G:C|C:A|A:A|A:G|G:A|A:G|G:C|A:C|A:C|T:C|T
CauAC255	Donghai100	Pop-2	China	Compact	C|C:T|C:A|C:T|A:T|C:T|G:C|A:A|T:A|G:A|G:A|T:C|C:T|A:C|T:T|T:C|C:C|G:G|A:T|C:C|G:G|C:G|G:T|T:G|A:G|G:G|G:C|C:G|G:T|T:C|C:G|G:C|T:A|A:A|A:C|G:G|A:A|G:C|C:C|C:T|C:C|T
CauAC256	Donghai120	Pop-2	China	Compact	C|C:C|T:C|A:A|T:C|T:G|T:A|C:T|A:A|A:G|G:T|A:T|C:A|T:T|C:T|T:C|C:C|C:G|A:T|C:C|G:G|G:G|C:T|C:G|A:G|C:G|G:C|C:G|G:T|T:C|C:G|G:C|T:A|A:A|A:C|C:G|G:A|A:C|A:C|A:T|C:C|C
CauAC257	Yinguan70B	Pop-2	China	Compact	C|C:T|C:A|A:T|T:T|C:T|G:C|A:A|A:G|G:A|G:A|T:T|T:A|A:T|T:T|T:C|C:G|C:G|G:C|T:G|C:G|G:C|G:T|T:G|G:C|G:G|G:T|C:A|A:T|T:G|G:G|G:T|C:A|A:A|A:C|C:G|A:A|A:C|C:A|C:T|T:T|T
CauAC258	Yinguan80	Pop-2	China	Compact	C|C:C|T:A|C:T|T:T|C:T|G:C|A:A|T:A|G:A|G:A|T:C|T:A|A:T|T:T|T:C|C:G|C:G|G:T|T:C|C:G|G:G|G:T|T:G|G:C|G:G|G:T|C:A|A:T|T:G|G:G|G:T|C:A|G:A|A:C|C:G|G:A|A:C|C:A|C:T|T:T|T
CauAC259	Yinguan90	Pop-2	China	Compact	C|C:T|C:A|C:T|A:T|C:G|G:A|A:T|A:G|A:G|G:T|T:C|T:A|T:T|C:T|T:C|C:G|C:A|G:C|T:G|C:C|G:G|C:T|C:G|A:G|C:G|G:T|C:G|G:T|T:G|G:G|G:C|C:A|G:A|A:G|C:A|G:G|A:C|C:C|C:C|T:T|T
CauAC263	Anyang140	Pop-2	China	Compact	C|C:C|C:A|A:T|T:C|T:T|G:A|A:A|T:A|A:A|G:T|T:C|T:A|A:C|C:T|T:C|C:C|C:G|G:T|T:C|C:C|G:C|G:C|T:A|A:C|G:G|G:C|C:G|G:T|T:G|G:G|G:T|C:A|G:A|A:G|C:A|G:G|G:A|C:A|C:C|C:T|T
CauAC264	Anyang180	Pop-2	China	Compact	C|C:C|C:A|A:T|T:C|T:G|G:C|C:A|A:A|A:G|G:T|T:C|C:A|A:C|C:C|C:T|T:C|C:A|G:T|T:C|C:C|C:G|G:T|T:A|A:C|C:G|G:C|T:G|G:T|T:G|C:G|G:C|C:G|A:A|A:C|G:G|G:A|A:C|C:C|C:T|C:T|T
CauAC265	Baibi	Pop-2	China	Compact	C|C:C|C:A|C:A|A:C|C:G|G:A|A:T|T:G|A:G|A:T|T:T|T:A|A:C|T:C|T:T|C:C|G:A|G:C|C:G|G:G|C:C|C:C|C:A|G:C|G:T|G:C|C:G|A:T|T:G|G:G|G:C|C:G|G:T|T:C|C:G|G:G|G:C|C:C|C:C|C:C|T
CauAC266	Xingli	Pop-2	China	Compact	C|C:C|C:C|C:A|A:C|C:G|G:A|A:T|T:G|A:A|A:A|A:T|T:A|A:C|T:C|T:C|C:C|G:G|G:C|C:G|G:G|C:G|G:T|T:A|A:G|G:T|T:C|T:G|A:T|T:C|C:G|G:C|C:G|G:T|T:C|C:G|G:A|G:C|C:C|C:C|C:C|C
CauAC267	Baiyang	Pop-2	China	Compact	C|C:C|C:C|A:A|A:C|C:G|G:A|A:T|T:A|A:A|A:A|A:T|T:A|A:T|T:T|T:C|C:G|G:G|G:C|C:G|G:C|C:G|C:T|C:G|A:G|G:G|T:T|T:A|A:T|T:C|C:G|G:C|C:G|G:T|T:C|C:G|G:G|G:C|C:C|C:C|C:C|C
CauAC268	Ribenxurguan	Pop-2	Japan	Compact	C|C:C|C:C|C:A|A:C|C:G|G:A|A:T|T:A|G:A|G:T|T:T|T:A|A:T|T:T|T:C|C:C|C:G|A:C|C:G|G:C|C:C|G:C|T:A|A:C|G:T|G:C|C:A|A:G|G:C|C:G|G:C|C:G|A:T|T:C|G:G|A:G|A:C|C:C|C:C|C:C|C
CauAC269	Jipin	Pop-2	China	Compact	C|C:C|C:A|A:A|T:C|T:G|G:A|A:T|T:G|A:A|G:T|T:T|T:A|A:T|C:T|T:C|T:C|C:A|A:C|C:G|G:C|G:C|C:T|C:A|A:G|C:G|T:C|C:G|G:T|T:C|C:G|G:C|C:A|G:T|T:C|C:G|G:G|G:C|C:C|C:C|C:C|C
CauAC270	Xuebai	Pop-2	China	Compact	C|C:C|C:C|A:A|A:C|C:G|G:A|A:T|T:G|A:A|A:A|T:T|T:A|A:C|T:C|T:T|C:C|G:G|G:C|C:G|G:G|C:C|G:C|T:A|A:G|G:T|T:C|T:A|A:T|T:G|G:A|A:C|C:G|G:T|T:C|C:G|G:G|G:C|C:C|C:C|C:C|C
CauAC001	Meiyusong88	Pop-3	China	Loose	C|C:C|C:A|A:A|A:C|C:G|G:A|A:T|T:G|G:G|G:T|T:C|C:A|A:T|T:T|T:C|C:G|G:G|A:C|C:G|G:C|C:C|G:C|T:A|G:G|G:G|G:C|T:G|G:T|T:C|C:G|G:C|C:A|A:A|A:G|G:A|A:A|A:A|A:C|C:T|T:T|T
CauAC003	Taiwansong60	Pop-3	China	Loose	C|C:C|C:C|A:A|A:C|C:G|G:A|A:A|T:G|G:A|G:A|T:T|C:T|A:C|T:T|T:C|C:G|G:A|A:T|C:C|G:C|C:C|G:C|T:G|G:C|G:T|G:T|T:A|G:T|T:G|G:G|G:T|C:G|A:T|A:C|G:G|A:A|A:A|A:C|C:C|T:T|T
CauAC004	Taiwansong80	Pop-3	China	Loose	C|C:C|C:A|A:A|A:C|C:G|G:A|A:T|T:G|G:G|A:T|T:C|T:A|A:T|T:T|T:C|C:G|C:A|A:C|T:G|C:C|C:G|G:T|T:G|A:G|G:G|G:T|C:G|G:T|T:C|C:G|G:C|C:A|A:A|A:G|G:A|G:A|G:A|A:C|A:T|T:T|T
CauAC005	Taiwansong105	Pop-3	China	Loose	C|C:C|T:A|A:A|T:C|T:G|T:A|C:T|A:G|A:G|A:T|A:C|C:A|T:T|T:T|T:C|C:G|G:A|A:C|T:G|C:C|C:G|C:T|C:G|A:G|G:G|T:T|T:G|A:T|T:G|G:G|G:C|T:A|A:A|A:G|C:A|A:A|A:A|A:C|C:T|C:T|C
CauAC006	Taiwansong115	Pop-3	China	Loose	C|C:C|C:A|A:A|A:C|C:G|G:A|A:T|A:G|G:G|A:T|T:C|T:A|A:T|T:T|T:C|C:G|C:A|G:C|C:G|G:C|C:G|G:T|T:G|A:G|G:G|G:T|C:G|G:T|T:G|G:G|G:C|C:A|G:A|A:G|C:A|A:A|G:A|C:C|C:T|C:T|T
CauAC007	Taisong65	Pop-3	China	Loose	C|C:C|T:A|A:A|T:C|T:G|T:A|C:T|A:G|A:G|A:T|A:C|C:A|T:T|T:T|T:C|C:G|G:A|A:C|T:G|C:C|C:G|C:T|C:G|A:G|G:G|T:T|T:G|A:T|T:G|G:G|G:C|T:A|A:A|A:G|C:A|A:A|A:A|A:C|C:T|C:T|C
CauAC008	Taisong85	Pop-3	China	Loose	C|C:C|C:A|A:A|T:C|T:G|G:A|A:T|T:G|G:G|G:T|T:C|T:A|A:T|C:T|T:C|C:G|G:A|G:C|C:G|G:C|C:G|G:T|T:G|G:G|G:G|T:T|C:G|G:T|T:C|C:G|G:C|C:A|A:A|A:G|C:A|G:A|G:A|A:C|A:T|T:T|T
CauAC009	Baiyuiajiao88	Pop-3	China	Loose	C|C:C|T:A|A:A|T:C|T:G|T:A|C:T|A:G|A:G|A:T|A:C|C:A|T:T|T:T|T:C|C:G|G:A|A:C|T:G|C:C|C:G|C:T|C:G|A:G|G:G|T:T|T:G|A:T|T:G|G:G|G:C|T:A|A:A|A:G|C:A|A:A|A:A|A:C|C:T|C:T|C
CauAC010	Baodao65	Pop-3	China	Loose	C|C:T|C:A|A:T|A:T|C:T|G:C|A:A|T:A|G:A|G:A|T:C|C:T|A:T|T:T|T:C|C:C|G:A|A:T|C:C|G:C|C:C|G:C|T:G|G:C|G:T|G:T|T:A|G:T|T:C|C:G|G:T|C:A|A:T|A:C|G:A|A:A|A:A|A:A|C:C|T:C|T
CauAC011	Baodao75	Pop-3	China	Loose	C|C:C|T:A|A:A|T:C|T:G|T:A|C:T|A:G|A:G|A:T|A:C|C:A|T:T|T:T|T:C|C:G|C:A|G:C|T:G|C:C|C:G|C:T|C:G|A:G|C:G|T:T|C:G|A:T|T:G|G:G|G:C|T:A|G:A|T:G|C:A|A:A|A:A|A:C|A:T|C:T|C
CauAC012	Jiangren88	Pop-3	China	Loose	C|C:C|C:A|A:A|T:C|T:G|G:A|A:T|T:G|G:G|G:T|T:C|T:A|A:T|C:T|T:C|C:G|G:A|G:C|C:G|G:C|C:G|G:T|T:G|G:G|G:G|T:T|C:G|G:T|T:C|C:G|G:C|C:A|A:A|A:G|C:A|G:A|G:A|A:C|A:T|T:T|T
CauAC013	Dongfangsong65	Pop-3	China	Loose	C|C:C|T:A|A:A|T:C|T:G|T:A|C:T|A:G|A:G|A:T|A:C|C:A|T:T|T:T|T:C|C:G|C:A|A:C|T:G|C:C|C:G|C:T|C:G|G:G|C:G|T:T|T:G|A:T|T:C|C:G|G:C|T:A|A:A|T:G|C:A|A:A|A:A|A:C|A:T|C:T|C
CauAC014	Zhenongsong75	Pop-3	China	Loose	C|C:T|C:A|A:T|A:T|C:T|G:A|A:A|T:A|G:A|G:A|T:C|C:T|A:T|T:T|T:C|C:G|G:G|A:T|C:C|G:C|C:C|G:C|T:A|G:C|G:T|G:C|T:A|G:T|T:G|G:G|G:T|C:G|A:T|A:C|G:A|A:A|A:A|A:A|C:C|T:C|T
CauAC015	ZNC1902	Pop-3	China	Loose	C|C:C|T:A|A:A|T:C|T:G|G:A|C:T|A:G|G:G|A:T|A:C|C:A|A:T|T:T|T:C|C:G|G:A|A:C|C:G|G:C|C:G|G:T|T:G|A:G|C:G|T:T|T:G|A:T|T:C|C:G|G:C|T:A|A:A|A:G|G:A|A:A|A:A|A:C|A:T|T:T|T
CauAC016	ZNC1904	Pop-3	China	Loose	C|C:T|C:A|A:T|A:T|C:T|G:A|A:A|T:A|G:A|G:A|T:C|C:T|A:T|T:T|T:C|C:G|G:G|A:T|C:C|G:C|C:C|G:C|T:A|G:C|G:T|G:C|T:A|G:T|T:G|G:G|G:T|C:G|A:T|A:C|G:A|A:A|A:A|A:A|C:C|T:C|T
CauAC017	ZNC1905	Pop-3	China	Loose	C|C:C|T:A|A:A|T:C|T:G|T:A|C:T|A:G|A:G|A:T|A:C|C:A|T:T|T:T|T:C|C:G|C:A|G:C|T:G|C:C|C:G|C:T|C:G|A:G|C:G|T:T|C:G|A:T|T:G|G:G|G:C|T:A|G:A|T:G|C:A|A:A|A:A|A:C|A:T|C:T|C
CauAC018	ZNC1908	Pop-3	China	Loose	C|C:T|C:A|A:T|A:T|C:T|G:A|A:T|T:A|A:A|A:T|A:C|C:A|T:T|C:T|T:C|C:G|C:A|A:C|C:G|G:C|C:G|G:T|T:G|A:G|G:T|G:C|C:A|G:G|G:C|C:G|G:C|C:A|A:A|T:C|G:A|A:A|A:A|A:A|A:T|C:C|C
CauAC019	ZNC1909	Pop-3	China	Loose	C|C:C|C:A|A:A|T:C|T:G|T:A|A:T|T:G|A:G|A:T|T:C|C:A|A:T|C:T|T:C|C:G|C:A|A:C|C:G|G:C|C:G|G:T|T:G|A:G|G:G|G:T|C:G|A:G|G:C|C:G|G:C|C:A|A:A|A:G|C:A|A:A|A:A|A:C|A:T|T:T|C
CauAC020	Dongyaxuesong	Pop-3	China	Loose	C|C:C|T:A|A:A|T:C|T:G|T:A|C:T|A:G|A:G|A:T|A:C|C:A|T:T|T:T|T:C|C:G|C:A|A:C|T:G|C:C|C:G|C:T|C:G|G:G|C:G|T:T|T:G|A:T|T:C|C:G|G:C|T:A|A:A|T:G|C:A|A:A|A:A|A:C|A:T|C:T|C
CauAC021	Gaolijiw	Pop-3	China	Loose	C|C:T|C:A|A:T|A:T|C:T|G:C|A:A|T:A|G:A|G:A|T:C|C:T|A:T|T:T|T:C|C:G|G:A|A:T|C:C|G:C|C:C|G:C|T:A|G:G|G:T|G:T|T:A|G:T|T:G|G:G|G:T|C:A|A:A|A:C|G:A|A:A|A:A|A:C|C:C|T:C|T
CauAC024	Biyu65	Pop-3	China	Loose	C|C:T|C:A|A:T|A:T|C:T|G:C|A:A|T:A|G:A|G:A|T:C|C:T|A:T|T:T|T:C|C:C|G:A|A:T|C:C|G:C|C:C|G:C|T:G|G:C|G:T|G:T|T:A|G:T|T:C|C:G|G:T|C:A|A:T|A:C|G:A|A:A|A:A|A:A|C:C|T:C|T
CauAC028	Unknown	Pop-3	China	Loose	C|C:T|C:A|A:T|A:T|C:T|G:A|A:A|T:A|G:A|G:A|T:T|C:T|A:T|T:C|T:C|C:C|G:A|A:T|C:C|G:G|C:C|G:C|T:A|G:G|G:T|G:T|T:A|G:G|G:G|G:G|G:T|C:A|A:T|A:C|G:G|A:A|A:C|A:A|C:C|T:C|T
CauAC029	Unknown	Pop-3	China	Loose	C|C:C|T:A|A:A|T:C|T:G|T:A|C:T|A:G|A:G|A:T|A:C|C:A|T:T|T:T|T:C|C:G|C:A|A:C|T:G|C:C|C:G|C:T|C:G|G:G|C:G|T:T|T:G|A:T|T:C|C:G|G:C|T:A|A:A|T:G|C:A|A:A|A:A|A:C|A:T|C:T|C
CauAC030	Unknown	Pop-3	China	Loose	C|C:T|C:A|A:T|A:T|C:T|G:A|A:A|T:A|G:A|G:A|T:T|C:T|A:T|T:C|T:C|C:C|G:A|A:T|C:C|G:G|C:C|G:C|T:A|G:G|G:T|G:T|T:A|G:G|G:G|G:G|G:T|C:A|A:T|A:C|G:G|A:A|A:C|A:A|C:C|T:C|T
CauAC032	Naire108	Pop-3	China	Loose	C|C:C|T:A|A:T|T:T|C:G|G:A|A:T|T:A|G:G|G:T|T:C|C:A|A:T|C:T|T:T|T:G|G:A|A:C|T:G|G:G|C:C|C:C|C:G|G:C|C:T|G:C|C:A|A:G|G:G|G:G|G:C|C:G|G:T|A:C|C:A|A:A|G:A|A:C|A:C|C:T|T
CauAC042	Fengmao80	Pop-3	China	Loose	C|C:T|C:A|A:T|A:T|C:T|G:C|A:A|T:G|G:A|G:A|T:T|C:A|A:C|T:T|T:C|C:G|G:G|A:T|C:C|G:C|C:G|G:T|T:A|G:G|G:G|G:T|T:G|G:G|T:G|C:G|G:C|C:G|A:T|A:C|G:A|A:A|A:A|A:A|C:C|T:C|T
CauAC043	Gaoxiong90	Pop-3	China	Loose	C|C:C|C:A|A:A|A:C|C:G|G:A|A:T|T:G|G:G|A:T|T:C|T:A|A:T|T:T|T:C|C:G|C:A|A:C|T:G|C:C|C:G|G:T|T:G|A:G|G:G|G:T|C:G|G:T|T:C|C:G|G:C|C:A|A:A|A:G|G:A|G:A|G:A|A:C|A:T|T:T|T
CauAC044	Qinggengsong	Pop-3	China	Loose	C|C:C|C:A|A:A|A:C|C:G|G:A|A:T|T:G|G:A|G:T|T:T|C:A|A:T|T:T|T:C|C:C|G:A|A:T|C:C|G:C|C:G|G:T|T:A|G:G|G:G|G:C|T:G|G:T|T:C|C:G|G:C|C:A|A:A|A:G|G:G|A:G|A:A|A:A|C:T|T:T|T
CauAC045	Yunyi80	Pop-3	China	Loose	C|C:C|C:A|A:A|A:C|C:G|G:A|A:T|T:G|G:G|A:T|T:C|T:A|A:T|T:T|T:C|C:G|C:A|A:C|T:G|C:C|C:G|G:T|T:G|A:G|G:G|G:T|C:G|G:T|T:C|C:G|G:C|C:A|A:A|A:G|C:A|G:A|G:A|A:C|A:T|T:T|T
CauAC046	Runyu68	Pop-3	China	Loose	C|C:C|T:A|A:A|T:C|T:G|T:A|A:T|A:G|A:G|A:T|A:C|C:A|T:T|T:T|T:C|C:G|G:A|G:C|T:G|C:C|C:G|C:T|C:G|A:G|C:G|T:T|C:G|A:T|T:G|G:G|G:C|T:A|G:A|T:G|C:A|A:A|A:A|A:C|A:T|C:T|C
CauAC047	Runyu80	Pop-3	China	Loose	C|C:C|C:A|A:A|T:C|T:G|G:A|A:T|T:G|G:G|G:T|T:C|T:A|A:T|C:T|T:C|C:G|G:A|G:C|C:G|G:C|C:G|G:T|T:G|G:G|G:G|T:T|C:G|G:T|T:C|C:G|G:C|C:A|A:A|A:G|C:A|G:A|G:A|A:C|A:T|T:T|T
CauAC048	Runyu90	Pop-3	China	Loose	C|C:C|C:A|A:A|A:C|C:G|G:A|A:T|T:G|G:G|A:T|T:C|T:A|A:T|T:T|T:C|C:G|C:A|A:C|T:G|C:C|C:G|G:T|T:G|A:G|G:G|G:T|C:G|G:T|T:C|C:G|G:C|C:A|A:A|A:G|G:A|G:A|G:A|A:C|A:T|T:T|T
CauAC049	Bian70	Pop-3	China	Loose	C|C:C|C:C|A:A|A:C|C:G|G:A|A:A|T:G|G:A|G:A|T:T|C:T|A:C|T:T|T:C|C:G|G:A|A:T|C:C|G:C|C:C|G:C|T:G|G:C|G:T|G:T|T:A|G:T|T:G|G:G|G:T|C:G|A:T|A:C|G:G|A:A|A:A|A:C|C:C|T:T|T
CauAC050	Bian80	Pop-3	China	Loose	C|C:C|C:A|A:A|T:C|T:G|G:A|A:T|T:G|G:G|G:T|T:C|T:A|A:T|C:T|T:C|C:G|G:A|G:C|C:G|G:C|C:G|G:T|T:G|G:G|G:G|T:T|C:G|G:T|T:C|C:G|G:C|C:A|A:A|A:G|C:A|G:A|G:A|A:C|A:T|T:T|T
CauAC051	Bian85	Pop-3	China	Loose	C|C:C|C:A|A:T|A:T|C:G|G:A|A:T|T:G|G:G|G:T|T:T|C:A|A:C|T:T|T:C|C:G|G:G|A:C|C:G|G:C|C:G|G:T|T:G|G:G|G:T|G:C|T:G|G:T|T:C|C:G|G:C|C:A|A:A|A:C|G:G|A:G|A:A|A:A|C:T|T:T|T
CauAC052	Taiwan80	Pop-3	China	Loose	C|C:C|C:A|A:A|T:C|T:G|G:A|A:T|T:G|G:G|G:T|T:T|T:A|A:C|C:T|T:C|C:G|G:A|G:C|C:G|G:C|C:G|G:T|T:G|G:G|G:G|T:T|C:G|G:T|T:C|C:G|G:C|C:A|A:A|A:G|C:A|G:A|G:A|A:C|A:T|T:T|T
CauAC053	Songhua65	Pop-3	China	Loose	C|C:C|T:A|A:A|T:C|T:G|T:A|C:T|A:G|A:G|A:T|A:C|C:A|T:T|T:T|T:C|C:G|C:A|A:C|T:G|C:C|C:G|C:T|C:G|G:G|C:G|T:T|T:G|A:T|T:C|C:G|G:C|T:A|A:A|T:G|C:A|A:A|A:A|A:C|A:T|C:T|C
CauAC054	Songhua75	Pop-3	China	Loose	C|C:T|C:A|A:T|A:T|C:T|G:C|A:A|T:A|G:A|G:A|T:C|C:T|A:T|T:T|T:C|C:G|G:A|A:T|C:C|G:C|C:C|G:C|T:A|G:G|G:T|G:T|T:A|G:T|T:G|G:G|G:T|C:A|A:A|A:C|G:A|A:A|A:A|A:C|C:C|T:C|T
CauAC055	Songhua80	Pop-3	China	Loose	C|C:C|C:A|A:A|T:C|T:G|G:A|A:T|T:G|G:G|G:T|T:C|T:A|A:T|C:T|T:C|C:G|G:A|G:C|C:G|G:C|C:G|G:T|T:G|G:G|G:G|T:T|C:G|G:T|T:C|C:G|G:C|C:A|A:A|A:G|C:A|G:A|G:A|A:C|A:T|T:T|T
CauAC056	Liangsong88	Pop-3	China	Loose	C|C:C|C:A|A:A|T:C|T:G|G:A|A:T|T:G|G:G|G:T|T:C|T:A|A:T|C:T|T:C|C:G|G:A|G:C|C:G|G:C|C:G|G:T|T:G|G:G|G:G|T:T|C:G|G:T|T:C|C:G|G:C|C:A|A:A|A:G|C:A|G:A|G:A|A:C|A:T|T:T|T
CauAC064	Dunasty	Pop-3	Thailand	Loose	C|C:T|T:A|A:A|A:C|T:G|G:A|A:T|T:G|A:G|G:T|T:C|C:A|A:T|T:T|T:T|T:C|G:A|A:T|C:G|G:C|G:C|C:C|C:G|G:C|C:T|T:C|C:A|A:G|G:G|G:A|A:C|C:G|A:T|A:C|C:A|A:A|G:A|A:A|C:C|T:C|T
CauAC066	Legend	Pop-3	India	Loose	C|C:T|T:A|A:A|A:T|C:G|G:A|A:T|T:A|G:G|G:T|T:C|C:A|A:T|T:T|T:T|T:G|C:A|G:C|T:G|G:G|C:C|C:C|C:G|G:C|C:T|T:C|C:A|G:G|G:G|G:G|G:C|C:G|G:A|A:C|C:A|A:G|A:A|A:A|A:C|T:T|C
CauAC067	Greenmagic	Pop-3	Japan	Loose	C|C:T|T:A|A:A|T:C|T:G|G:A|A:T|T:G|G:G|A:T|T:C|C:A|A:T|T:T|C:C|T:G|G:A|A:C|T:G|G:C|G:G|C:T|C:G|G:G|C:G|T:C|C:A|A:G|G:C|C:G|G:C|C:G|G:A|T:C|C:A|A:G|A:C|A:C|C:C|C:C|C
CauAC088	Unknown	Pop-3	China	Loose	C|C:C|C:A|A:T|A:T|C:G|G:A|A:T|T:G|G:G|G:T|T:T|C:A|A:C|T:T|T:C|C:G|G:G|A:C|T:G|G:C|C:G|G:T|T:G|G:G|G:T|T:C|C:G|G:T|T:C|C:G|G:C|C:A|A:A|A:C|G:G|A:G|A:A|A:A|C:T|T:T|T
CauAC089	Baiyu80	Pop-3	China	Loose	C|C:C|C:A|A:A|T:C|T:G|G:A|A:T|T:G|G:G|G:T|T:C|T:A|A:T|C:T|T:C|C:G|G:A|G:C|C:G|G:C|C:G|G:T|T:G|G:G|G:G|T:T|C:G|G:T|T:C|C:G|G:C|C:A|A:A|A:G|C:A|G:A|G:A|A:C|A:T|T:T|T
CauAC090	Unknown	Pop-3	China	Loose	C|G:C|T:A|A:A|T:C|T:G|T:A|C:T|A:G|A:G|A:T|A:C|C:A|T:T|T:T|T:C|C:G|C:A|A:C|T:G|C:C|C:G|C:T|C:G|G:G|C:G|T:T|T:G|A:T|T:C|C:G|G:C|T:A|A:A|T:G|C:A|A:A|A:A|A:C|A:T|C:T|C
CauAC100	Fantasy1	Pop-3	France	Loose	C|C:T|T:A|A:A|T:C|T:G|G:A|A:T|T:G|G:G|G:T|T:C|C:A|A:T|C:C|C:T|T:G|C:A|A:C|C:G|G:G|G:C|C:C|C:G|G:C|G:T|T:C|C:A|G:G|G:G|G:G|G:C|C:G|G:T|T:C|C:A|A:A|G:A|C:A|A:C|C:C|C
CauAC171	Songl90	Pop-3	China	Loose	C|C:C|C:A|A:A|A:C|C:G|G:A|A:T|T:G|G:G|A:T|T:C|T:A|A:T|T:T|T:C|C:G|C:A|A:C|T:G|C:C|C:G|G:T|T:G|A:G|G:G|G:T|C:G|G:T|T:C|C:G|G:C|C:A|A:A|A:G|G:A|G:A|G:A|A:C|A:T|T:T|T
CauAC172	Songguan90	Pop-3	China	Loose	C|C:C|T:A|A:A|T:C|T:G|T:A|C:T|A:G|G:G|A:T|A:C|T:A|A:T|C:T|T:C|C:G|G:A|G:C|T:G|C:C|C:G|G:T|T:G|A:G|G:G|G:T|T:G|G:G|G:G|G:G|G:C|C:A|G:A|T:G|C:A|A:A|A:A|A:C|A:T|C:T|C
CauAC173	Songguan80	Pop-3	China	Loose	C|C:T|C:A|A:T|A:T|C:T|G:C|A:A|T:A|G:A|G:A|T:C|C:T|A:T|T:T|T:C|C:C|G:A|A:T|C:C|G:C|C:C|G:C|T:G|G:C|G:T|G:T|T:A|G:T|T:C|C:G|G:T|C:A|A:T|A:C|G:A|A:A|A:A|A:A|C:C|T:C|T
CauAC174	Shanhu80	Pop-3	China	Loose	C|C:C|T:A|A:A|T:C|T:G|T:A|C:T|A:G|A:G|A:T|A:C|C:A|T:T|T:T|T:C|C:G|C:A|G:C|T:G|C:C|C:G|C:T|C:G|A:G|C:G|T:T|C:G|A:T|T:G|G:G|G:C|T:A|G:A|T:G|C:A|A:A|A:A|A:C|A:C|C:T|C
CauAC175	Song0524	Pop-3	Unknown	Loose	C|C:T|C:A|A:T|A:T|C:T|G:C|A:A|T:A|G:A|G:A|T:C|C:T|A:T|T:T|T:C|C:G|G:A|A:T|C:C|G:C|C:C|G:C|T:A|G:G|G:T|G:T|T:A|G:T|T:G|G:G|G:T|C:A|A:A|A:C|G:A|A:A|A:A|A:C|C:C|T:C|T
CauAC176	Yihe65	Pop-3	China	Loose	C|C:C|T:A|C:A|A:C|C:G|T:A|C:T|A:G|A:G|A:T|A:C|C:A|T:T|T:T|C:C|C:G|C:A|G:C|T:G|C:C|G:G|G:T|T:G|A:G|C:G|G:T|C:G|G:G|G:G|G:G|G:C|T:A|A:A|A:G|C:A|A:A|G:A|A:C|A:T|T:T|T
CauAC177	Songzhengmei	Pop-3	China	Loose	C|C:T|C:A|A:T|A:T|C:T|G:A|A:A|T:A|G:A|G:A|T:C|C:T|A:T|T:T|T:C|C:G|G:G|A:T|C:C|G:C|C:C|G:C|T:A|G:C|G:T|G:C|T:A|G:T|T:G|G:G|G:T|C:G|A:T|A:C|G:A|A:A|A:A|A:A|C:C|T:C|T
CauAC178	Meiquansong	Pop-3	Unknown	Loose	C|C:C|T:A|A:A|T:C|T:G|T:A|C:T|A:G|A:G|A:T|A:C|C:A|T:T|T:T|T:C|C:G|G:A|A:C|T:G|C:C|C:G|C:T|C:G|A:G|G:G|T:T|T:G|A:T|T:G|G:G|G:C|T:A|A:A|A:G|C:A|A:A|A:A|A:C|C:T|C:T|C
CauAC179	Qingjie	Pop-3	Unknown	Loose	C|C:T|C:A|A:T|A:T|C:T|G:C|A:A|T:A|G:A|G:A|T:C|C:T|A:T|T:T|T:C|C:G|G:A|A:T|C:C|G:C|C:C|G:C|T:A|G:G|G:T|G:T|T:A|G:T|T:G|G:G|G:T|C:A|A:A|A:C|G:A|A:A|A:A|A:C|C:C|T:C|T
CauAC181	Shengfeng60	Pop-3	China	Loose	C|C:C|T:A|A:A|T:C|T:G|T:A|C:T|A:G|A:G|A:T|A:C|C:A|T:T|T:T|T:C|C:G|C:A|A:C|T:G|C:C|C:G|C:T|C:G|G:G|C:G|T:T|T:G|A:T|T:C|C:G|G:C|T:A|A:A|T:G|C:A|A:A|A:A|A:C|A:T|C:T|C
CauAC182	Shengfeng65	Pop-3	China	Loose	C|C:C|C:C|A:A|A:C|C:G|G:A|A:A|T:G|G:A|G:A|T:T|C:T|A:C|T:T|T:C|C:G|G:A|A:T|C:C|G:C|C:C|G:C|T:G|G:C|G:T|G:T|T:A|G:T|T:G|G:G|G:T|C:G|A:T|A:C|G:G|A:A|A:A|A:C|C:C|T:T|T
CauAC183	Shengfeng70	Pop-3	China	Loose	C|C:C|T:A|A:A|T:C|T:G|T:A|A:T|A:G|A:G|A:T|A:C|C:A|T:T|T:T|T:C|C:G|G:A|G:C|T:G|C:C|C:G|C:T|C:G|A:G|C:G|T:T|C:G|A:T|T:G|G:G|G:C|T:A|G:A|T:G|C:A|A:A|A:A|A:C|A:T|C:T|C
CauAC184	Shengfeng80	Pop-3	China	Loose	C|C:C|C:A|A:A|T:C|T:G|G:A|A:T|T:G|G:G|G:T|T:C|T:A|A:T|C:T|T:C|C:G|G:A|G:C|C:G|G:C|C:G|G:T|T:G|G:G|G:G|T:T|C:G|G:T|T:C|C:G|G:C|C:A|A:A|A:G|C:A|G:A|G:A|A:C|A:T|T:T|T
CauAC187	Suesong65	Pop-3	China	Loose	C|C:C|T:A|A:A|T:C|T:G|T:A|C:T|A:G|A:G|A:T|A:C|C:A|T:T|T:T|T:C|C:G|C:A|A:C|T:G|C:C|C:G|C:T|C:G|G:G|C:G|T:T|T:G|A:T|T:C|C:G|G:C|T:A|A:A|T:G|C:A|A:A|A:A|A:C|A:T|C:T|C
CauAC188	Taiwaj66	Pop-3	China	Loose	C|C:C|C:A|C:A|A:C|C:G|G:A|A:T|A:G|G:G|A:T|A:C|T:A|T:T|C:T|T:C|C:G|G:A|A:C|T:G|C:C|C:G|C:T|C:G|G:G|C:G|T:T|T:G|A:T|T:G|G:G|G:C|T:A|G:A|T:G|C:A|G:A|A:A|A:C|C:T|C:T|T
CauAC189	Znm70	Pop-3	China	Loose	C|C:C|C:C|A:A|A:C|C:G|G:A|A:A|T:G|G:A|G:A|T:T|C:T|A:C|T:T|T:C|C:G|G:A|A:T|C:C|G:C|C:C|G:C|T:G|G:C|G:T|G:T|T:A|G:T|T:G|G:G|G:T|C:G|A:T|A:C|G:G|A:A|A:A|A:C|C:C|T:T|T
CauAC190	Znm60	Pop-3	China	Loose	C|C:C|T:A|A:A|T:C|T:G|T:A|A:T|A:G|A:G|A:T|A:C|T:A|T:T|T:T|C:C|C:G|C:A|A:C|T:G|C:C|G:G|G:T|T:G|A:G|G:G|T:T|T:G|A:G|G:G|G:G|G:C|T:A|A:A|T:G|C:A|G:A|A:A|C:C|A:T|C:T|C
CauAC191	Taiyou65	Pop-3	China	Loose	C|C:T|C:A|A:T|A:T|C:T|G:A|A:A|T:A|G:A|G:A|T:T|C:T|A:T|T:C|T:C|C:C|G:A|A:T|C:C|G:G|C:G|G:C|T:A|G:G|G:T|G:T|T:A|G:T|T:G|G:G|G:T|C:A|A:T|A:C|G:G|A:A|A:C|A:A|C:C|T:C|T
CauAC193	Sueyumei88	Pop-3	China	Loose	C|C:C|C:A|A:A|T:C|T:G|G:A|A:T|T:G|G:G|G:T|T:C|T:A|A:T|C:T|T:C|C:G|G:A|G:C|C:G|G:C|C:G|G:T|T:G|G:G|G:G|T:T|C:G|G:T|T:C|C:G|G:C|C:A|A:A|A:G|C:A|G:A|G:A|A:C|A:T|T:T|T
CauAC195	Suesong5	Pop-3	China	Loose	C|C:C|C:A|A:A|A:C|C:G|G:A|A:T|T:G|G:A|A:T|T:T|T:A|A:T|T:T|T:C|C:C|C:A|A:T|T:C|C:C|C:G|G:T|T:A|A:G|G:G|G:C|C:G|G:T|T:C|C:G|G:C|C:A|A:A|A:G|G:G|G:G|G:A|A:A|A:T|T:T|T
CauAC200	Taiwanmingxing80	Pop-3	China	Loose	C|C:C|C:A|A:A|T:C|T:G|G:A|A:T|T:G|G:G|G:T|T:C|T:A|A:T|C:T|T:C|C:G|G:A|G:C|C:G|G:C|C:G|G:T|T:G|G:G|G:G|T:T|C:G|G:T|T:G|C:G|G:C|C:A|A:A|A:G|C:A|G:A|G:A|A:C|A:T|T:T|T
CauAC202	Xinsong	Pop-3	China	Loose	C|C:C|C:A|A:A|A:C|C:G|G:A|A:T|T:G|G:G|G:T|T:C|T:A|A:T|C:T|C:C|T:G|C:A|G:C|C:G|G:C|G:G|C:T|C:G|A:G|G:G|T:T|C:G|A:T|G:G|G:G|G:C|C:A|G:A|T:G|C:A|G:A|G:A|C:C|C:T|C:T|C
CauAC203	Ousong803	Pop-3	China	Loose	C|C:C|T:A|A:T|T:C|T:G|T:A|C:T|T:G|G:G|A:T|A:C|C:A|T:T|T:T|T:C|C:G|G:A|A:C|T:G|G:C|C:G|C:T|C:G|G:G|C:G|T:T|C:G|G:T|T:G|G:G|G:C|C:A|A:A|A:G|C:A|G:A|A:A|A:C|A:T|C:T|T
CauAC204	Ousong856	Pop-3	China	Loose	C|C:T|C:A|A:T|T:T|C:T|G:C|A:A|T:G|G:G|G:T|T:C|T:A|A:T|T:T|T:C|C:G|G:A|G:C|T:G|C:C|C:G|C:T|C:G|A:G|G:T|T:C|T:G|G:T|T:C|C:G|G:T|C:A|A:A|A:C|G:G|A:A|A:A|A:A|C:C|T:C|T
CauAC207	Tai80	Pop-3	China	Loose	C|C:C|C:A|A:A|A:C|C:G|G:A|A:T|T:G|G:G|G:T|T:C|T:A|A:T|C:T|C:C|T:G|C:A|G:C|C:G|G:C|G:G|C:T|C:G|A:G|G:G|T:T|C:G|A:G|G:G|G:G|G:C|C:A|G:A|T:G|C:A|G:A|G:A|C:C|C:T|C:T|C
CauAC209	Shengfeng85	Pop-3	China	Loose	C|C:C|C:A|A:A|T:C|T:G|G:A|A:T|T:G|G:G|G:T|T:C|T:A|A:T|C:T|T:C|C:G|G:A|G:C|C:G|G:C|C:G|G:T|T:G|G:G|G:G|T:T|C:G|G:T|T:C|C:G|G:C|C:A|A:A|A:G|C:A|G:A|G:A|A:C|A:T|T:T|T
CauAC210	Qingfeng65	Pop-3	China	Loose	C|C:C|C:A|C:A|A:C|C:G|G:A|A:T|A:G|G:G|A:T|A:C|T:A|T:T|C:T|T:C|C:G|G:A|A:C|T:G|C:C|C:G|C:T|C:G|G:G|C:G|T:T|T:G|A:T|T:G|G:G|G:C|T:A|G:A|T:G|C:A|G:A|A:A|A:C|C:T|C:T|T
CauAC213	Mingzhu	Pop-3	China	Loose	C|C:C|C:A|A:A|A:C|C:G|G:A|A:T|T:G|G:A|G:T|T:T|C:A|A:T|T:T|T:C|C:C|G:A|A:T|C:C|G:C|C:G|G:T|T:A|G:G|G:G|G:C|T:G|G:T|T:C|C:G|G:C|C:A|A:A|A:G|G:G|A:G|A:A|A:A|C:T|T:T|T
CauAC240	Unknown	Pop-3	Unknown	Loose	C|C:C|C:A|A:T|A:T|C:G|G:A|A:T|T:G|G:G|G:T|T:T|C:A|A:C|T:T|T:C|C:G|G:G|A:C|C:G|G:C|C:G|G:T|T:G|G:G|G:T|G:C|T:G|G:T|T:C|C:G|G:C|C:A|A:A|A:C|G:G|A:G|A:A|A:A|C:T|T:T|T
CauAC241	Unknown	Pop-3	Unknown	Loose	C|C:C|C:A|A:A|A:C|C:G|G:A|A:T|T:G|G:G|G:T|T:C|T:A|A:T|C:T|T:C|C:G|C:A|G:C|C:G|G:C|C:G|G:T|T:G|A:G|G:G|T:T|T:G|A:T|T:G|G:G|G:C|T:A|G:A|T:G|C:A|G:A|A:A|A:C|C:C|T:T|T
CauAC242	Unknown	Pop-3	Unknown	Loose	C|C:C|T:A|A:A|A:C|C:G|T:A|A:T|T:G|A:G|A:T|A:C|C:A|T:T|T:T|T:C|C:G|G:A|A:C|C:G|G:C|C:G|G:T|T:G|G:G|G:G|T:T|T:G|G:G|G:C|C:G|G:C|C:A|A:A|A:G|G:A|A:A|A:A|A:C|A:T|C:T|C
CauAC243	Unknown	Pop-3	Unknown	Loose	C|C:C|T:A|A:A|T:C|T:G|T:A|C:T|A:G|A:G|A:T|A:C|C:A|T:T|T:T|T:C|C:G|C:A|G:C|T:G|C:C|C:G|C:T|C:G|A:G|C:G|T:T|C:G|A:T|T:G|G:G|G:C|T:A|G:A|T:G|C:A|A:A|A:A|A:C|A:T|C:T|C
CauAC246	Unknown	Pop-3	Unknown	Loose	C|C:T|T:A|A:A|T:T|C:G|G:A|C:T|T:A|G:G|G:T|T:C|C:A|A:T|T:T|T:T|T:G|G:A|A:C|C:G|G:G|C:C|C:C|C:G|G:C|C:T|T:C|C:A|G:G|G:G|G:G|G:C|C:G|G:A|T:C|C:A|A:G|G:A|C:A|A:C|C:T|C
CauAC271	F1Jiaopei9	Pop-3	China	Loose	C|C:C|C:A|A:A|A:C|C:G|G:A|A:T|T:G|G:G|A:T|T:C|T:A|A:T|T:T|T:C|C:G|C:A|A:C|T:G|C:C|C:G|G:T|T:G|A:G|G:G|G:T|C:G|G:T|T:C|C:G|G:C|C:A|A:A|A:G|G:A|G:A|G:A|A:C|A:T|T:T|T
CauAC272	Xuesong65	Pop-3	China	Loose	C|C:C|T:A|A:A|T:C|T:G|T:A|C:T|A:G|A:G|A:T|A:C|C:A|T:T|T:T|T:C|C:G|C:A|A:C|T:G|C:C|C:G|C:T|C:G|G:G|C:G|T:T|T:G|A:T|T:C|C:G|G:C|T:A|A:A|T:G|C:A|A:A|A:A|A:C|A:T|C:T|C
CauAC273	Meisongyu85	Pop-3	China	Loose	C|C:C|C:A|A:A|T:C|T:G|G:A|A:T|T:G|G:G|G:T|T:C|T:A|A:T|C:T|T:C|C:G|G:A|G:C|C:G|G:C|C:G|G:T|T:G|G:G|G:G|T:T|C:G|G:T|T:C|C:G|G:C|C:A|A:A|A:G|C:A|G:A|G:A|A:C|A:T|T:T|T
CauAC274	Chunqing	Pop-3	China	Loose	C|C:C|T:A|A:A|T:C|T:G|T:A|C:T|A:G|A:G|A:T|A:C|C:A|T:T|T:T|T:C|C:G|C:A|G:C|T:G|C:C|C:G|C:T|C:G|A:G|C:G|T:T|C:G|A:T|T:G|G:G|G:C|T:A|G:A|T:G|C:A|A:A|A:A|A:C|A:T|C:T|C
CauAC276	Xuzhouqingsong	Pop-3	China	Loose	C|C:C|T:A|A:A|T:C|T:G|T:A|A:T|A:G|A:G|A:T|A:C|C:A|T:T|T:T|T:C|C:G|G:A|G:C|T:G|C:C|C:G|C:T|C:G|A:G|C:G|T:T|C:G|A:T|T:G|G:G|G:C|T:A|G:A|T:G|C:A|A:A|A:A|A:C|A:T|C:T|C
CauAC277	Taiwanqing	Pop-3	China	Loose	C|G:C|T:A|A:A|T:C|T:G|T:A|A:T|A:G|A:G|A:T|A:C|C:A|T:T|T:T|T:C|C:G|G:A|G:C|T:G|C:C|C:G|C:T|C:G|A:G|G:G|T:T|C:G|A:T|T:G|G:G|G:C|T:G|G:T|A:C|G:A|A:A|A:A|A:A|C:C|T:C|T
CauAC280	Qingsong75	Pop-3	China	Loose	C|C:T|C:A|A:T|A:T|C:T|G:C|A:A|T:A|G:A|G:A|T:C|C:T|A:T|T:T|T:C|C:G|G:A|A:T|C:C|G:C|C:C|G:C|T:A|G:G|G:T|G:T|T:A|G:T|T:G|G:G|G:T|C:A|A:A|A:C|G:A|A:A|A:A|A:C|C:C|T:C|T
CauAC281	Meiwei65	Pop-3	China	Loose	C|C:C|C:C|A:A|A:C|C:G|G:A|A:A|T:G|G:G|G:T|T:C|C:A|A:C|T:T|T:C|C:G|G:A|A:C|C:G|G:C|C:G|G:T|T:G|G:C|G:T|G:T|T:A|G:T|T:G|G:G|G:T|C:A|A:A|A:G|G:A|A:A|A:A|A:C|C:C|C:T|T
CauAC282	Meiwei64	Pop-3	China	Loose	C|C:C|T:A|A:A|T:C|T:G|T:A|C:T|A:G|A:G|A:T|A:C|C:A|T:T|T:T|T:C|C:G|C:A|A:C|T:G|C:C|C:G|C:T|C:G|G:G|C:G|T:T|T:G|A:T|T:C|C:G|G:C|T:A|A:A|T:G|C:A|A:A|A:A|A:C|A:T|C:T|C
CauAC283	Meisong75	Pop-3	China	Loose	C|C:T|C:A|A:T|A:T|C:T|G:C|A:A|T:A|G:A|G:A|T:C|C:T|A:T|T:T|T:C|C:C|G:A|A:T|C:C|G:C|C:C|G:C|T:G|G:C|G:T|G:T|T:A|G:T|T:C|C:G|G:T|C:A|A:T|A:C|G:A|A:A|A:A|A:A|C:C|T:C|T
CauAC284	Gangtian	Pop-3	China	Loose	C|C:C|T:A|A:A|T:C|T:G|T:A|C:T|A:G|A:G|A:T|A:C|C:A|T:T|T:T|T:C|C:G|C:A|G:C|T:G|C:C|C:G|C:T|C:G|A:G|C:G|T:T|C:G|A:T|T:G|G:G|G:C|T:A|G:A|T:G|C:A|A:A|A:A|A:C|A:T|C:T|C
CauAC286	Mingzhu65	Pop-3	China	Loose	C|C:C|T:A|A:A|T:C|T:G|T:A|C:T|A:G|A:G|A:T|A:C|C:A|T:T|T:T|T:C|C:G|C:A|A:C|T:G|C:C|C:G|C:T|C:G|G:G|C:G|T:T|T:G|A:T|T:C|C:G|G:C|T:A|A:A|T:G|C:A|A:A|A:A|A:C|A:T|C:T|C
CauAC287	Liangan65	Pop-3	China	Loose	C|C:T|C:A|A:T|A:T|C:T|G:C|A:A|T:A|G:A|G:A|T:C|C:T|A:T|T:T|T:C|C:C|G:A|A:T|C:C|G:C|C:C|G:C|T:G|G:C|G:T|G:T|T:A|G:T|T:C|C:G|G:T|C:A|A:T|A:C|G:A|A:A|A:A|A:A|C:C|T:C|T
CauAC292	Huierjia100	Pop-3	China	Loose	C|C:C|C:A|A:A|A:C|C:G|G:A|A:T|T:G|G:G|A:T|T:C|T:A|A:T|C:T|T:C|C:G|G:A|A:C|C:G|G:C|C:G|G:T|T:G|G:G|G:G|G:T|C:G|G:T|T:C|C:G|G:C|C:A|A:A|A:G|C:A|G:A|G:A|A:C|A:T|T:T|T
CauAC293	Meiyusong55	Pop-3	China	Loose	C|C:C|T:A|A:A|T:C|T:G|T:A|A:T|A:G|A:G|A:T|A:C|T:A|T:T|T:T|C:C|C:G|C:A|A:C|T:G|C:C|G:G|G:T|T:G|A:G|G:G|T:T|T:G|A:G|G:G|G:G|G:C|T:A|A:A|T:G|C:A|G:A|A:A|C:C|A:T|C:T|C
CauAC294	Meiyusong60	Pop-3	China	Loose	C|C:C|T:A|A:A|T:C|T:G|T:A|C:T|A:G|A:G|A:T|A:C|C:A|T:T|T:T|T:C|C:G|C:A|A:C|T:G|C:C|C:G|C:T|C:G|G:G|C:G|T:T|T:G|A:T|T:C|C:G|G:C|T:A|A:A|T:G|C:A|A:A|A:A|A:C|A:T|C:T|C
CauAC295	Meiyusong65	Pop-3	China	Loose	C|C:T|C:A|A:T|A:T|C:T|G:C|A:A|T:A|G:A|G:A|T:C|C:T|A:T|T:T|T:C|C:G|G:A|A:T|C:C|G:C|C:C|G:C|T:A|G:G|G:T|G:T|T:A|G:T|T:G|G:G|G:T|C:A|A:A|A:C|G:A|A:A|A:A|A:C|C:C|T:C|T
CauAC296	Meiyusong70	Pop-3	China	Loose	C|C:C|T:A|A:A|T:C|T:G|T:A|A:T|A:G|A:G|A:T|A:C|C:A|T:T|T:T|T:C|C:G|G:A|G:C|T:G|C:C|C:G|C:T|C:G|A:G|C:G|T:T|C:G|A:T|T:G|G:G|G:C|T:A|G:A|T:G|C:A|A:A|A:A|A:C|A:T|C:T|C
CauAC297	Meiyusong80	Pop-3	China	Loose	C|C:T|C:A|A:T|A:T|C:T|G:C|A:A|T:A|G:A|G:A|T:C|C:T|A:T|T:T|T:C|C:G|G:A|A:T|C:C|G:C|C:C|G:C|T:A|G:G|G:T|G:T|T:A|G:T|T:G|G:G|G:T|C:A|A:A|A:C|G:A|A:A|A:A|A:C|C:C|T:C|T
CauAC298	Meiyusong100	Pop-3	China	Loose	C|C:C|C:A|A:A|A:C|C:G|G:A|A:T|A:G|G:G|A:T|T:C|T:A|A:T|T:T|T:C|C:G|C:A|G:C|C:G|G:C|C:G|G:T|T:G|A:G|G:G|G:T|C:G|G:T|T:G|G:G|G:C|C:A|G:A|A:G|C:A|A:A|G:A|C:C|C:T|C:T|T
CauAC301	Taili70	Pop-3	China	Loose	C|C:C|C:C|A:A|A:C|C:G|G:A|A:A|T:G|G:G|G:T|T:C|C:A|A:C|T:T|T:C|C:G|G:A|A:C|C:G|G:C|C:G|G:T|T:G|G:C|G:T|G:T|T:A|G:T|T:G|G:G|G:T|C:A|A:A|A:G|G:A|A:A|A:A|A:C|C:C|T:T|T
CauAC302	Taili80	Pop-3	China	Loose	C|C:C|C:A|A:A|A:C|C:G|G:A|A:T|T:G|G:G|A:T|T:C|T:A|A:T|T:T|T:C|C:G|C:A|A:C|T:G|C:C|C:G|G:T|T:G|A:G|G:G|G:T|C:G|G:T|T:C|C:G|G:C|C:A|A:A|A:G|G:A|G:A|G:A|A:C|A:T|T:T|T
CauAC303	Huierjia75	Pop-3	China	Loose	C|C:C|T:A|A:A|T:C|T:G|T:A|C:T|A:G|A:G|A:T|A:C|C:A|T:T|T:T|T:C|C:G|C:A|A:C|T:G|C:C|C:G|C:T|C:G|G:G|C:G|T:T|T:G|A:T|T:C|C:G|G:C|T:A|A:A|T:G|C:A|A:A|A:A|A:C|A:T|C:T|C
CauAC304	Nantaiwan90	Pop-3	China	Loose	C|C:T|C:A|A:T|A:T|C:T|G:C|A:A|T:G|G:A|G:A|T:T|C:A|A:C|T:T|T:C|C:G|G:G|A:T|C:C|G:C|C:G|G:T|T:A|G:G|G:G|G:T|T:G|G:G|G:G|G:G|G:C|C:G|A:T|A:C|G:A|A:A|A:A|A:A|C:C|T:C|T
CauAC305	Meisong70	Pop-3	China	Loose	C|C:C|C:A|A:A|T:C|T:G|T:A|C:T|A:G|A:G|A:T|A:C|C:A|T:T|T:T|T:C|C:C|C:A|A:C|C:G|G:C|C:C|G:T|T:G|G:C|G:T|G:T|T:A|G:T|T:C|C:G|G:T|C:A|A:T|A:C|G:A|A:A|A:A|A:A|C:C|C:C|C
CauAC306	Qingsong60	Pop-3	China	Loose	C|C:C|T:A|A:A|T:C|T:G|T:A|C:T|A:G|A:G|A:T|A:C|C:A|T:T|T:T|T:C|C:G|C:A|A:C|T:G|C:C|C:G|C:T|C:G|G:G|C:G|T:T|T:G|A:T|T:C|C:G|G:C|T:A|A:A|T:G|C:A|A:A|A:A|A:C|A:T|C:T|C
CauAC308	Taiwan90	Pop-3	China	Loose	C|C:T|T:A|A:A|T:C|T:T|T:A|A:T|A:G|A:G|A:T|A:C|C:A|A:T|T:T|T:C|C:G|G:A|G:C|T:G|C:C|C:G|C:T|C:G|A:G|C:G|T:T|C:G|A:T|T:G|G:G|G:C|T:A|G:A|T:G|C:A|A:A|A:A|A:C|C:T|T:T|T
CauAC309	Qinggengbai80	Pop-3	China	Loose	C|C:C|C:A|A:T|A:T|C:G|G:A|A:T|T:G|G:G|G:T|T:T|C:A|A:C|T:T|T:C|C:G|G:G|A:C|C:G|G:C|C:G|G:T|T:G|G:G|G:T|G:C|T:G|G:T|T:C|C:G|G:C|C:A|A:A|A:C|G:G|A:G|A:A|A:A|C:T|T:T|T
CauAC310	Chuandao80	Pop-3	China	Loose	C|C:C|T:A|A:A|T:C|T:G|T:A|C:T|A:G|A:G|A:T|A:C|C:A|T:T|T:T|T:C|C:G|C:A|G:C|T:G|C:C|C:G|C:T|C:G|A:G|C:G|T:T|C:G|A:T|T:G|G:G|G:C|T:A|G:A|T:G|C:A|A:A|A:A|A:C|A:T|C:T|C
CauAC311	Songyue	Pop-3	China	Loose	C|C:C|C:A|A:A|A:C|C:G|G:A|A:T|T:G|G:G|A:T|T:C|T:A|A:T|C:T|T:C|C:G|G:A|G:C|C:G|G:C|C:G|G:T|T:G|A:G|C:G|G:T|C:G|G:G|G:C|C:G|G:C|C:A|A:A|A:G|G:A|A:A|A:A|A:C|C:T|C:T|T
CauAC312	Taiwan65	Pop-3	China	Loose	C|C:C|T:A|A:A|T:C|T:G|T:A|A:T|A:G|A:G|A:T|A:C|C:A|T:T|T:T|T:C|C:G|G:A|G:C|C:G|C:C|C:G|C:T|C:G|A:G|C:G|T:T|C:G|A:T|T:G|G:G|G:C|T:A|G:A|A:G|C:A|A:A|A:A|A:C|A:T|C:T|C
CauAC313	Qingsong60	Pop-3	China	Loose	C|C:T|C:A|A:T|A:T|C:T|G:A|A:A|T:A|G:A|G:A|T:T|C:T|A:T|T:C|T:C|C:C|G:A|A:T|C:C|G:G|C:C|G:C|T:A|G:G|G:T|G:T|T:A|G:G|G:G|G:G|G:T|C:A|A:T|A:C|G:G|A:A|A:C|A:A|C:C|T:C|T
CauAC317	Huamei70	Pop-3	China	Loose	C|C:T|C:A|A:T|A:T|C:T|G:C|A:A|T:A|G:A|G:A|T:C|C:T|A:T|T:T|T:C|C:G|G:A|A:T|C:C|G:C|C:C|G:C|T:A|G:G|G:T|G:T|T:A|G:T|T:G|G:G|G:T|C:A|A:A|A:C|G:A|A:A|A:A|A:C|C:C|T:C|T
CauAC318	Huamei80	Pop-3	China	Loose	C|C:C|T:A|A:A|T:C|T:G|T:A|C:T|A:G|A:G|A:T|A:C|C:A|T:T|T:T|T:C|C:G|G:A|A:C|T:G|C:C|C:G|C:T|C:G|A:G|G:G|T:T|T:G|A:T|T:G|G:G|G:C|T:A|A:A|A:G|C:A|A:A|A:A|A:C|C:T|C:T|C
CauAC319	Qingsong75	Pop-3	China	Loose	C|C:T|C:A|A:T|A:T|C:T|G:C|A:A|T:A|G:A|G:A|T:C|C:T|A:T|T:T|T:C|C:C|G:A|A:T|C:C|G:C|C:C|G:C|T:G|G:C|G:T|G:T|T:A|G:T|T:C|C:G|G:T|C:A|A:T|A:C|G:A|A:A|A:A|A:A|C:C|T:C|T
CauAC320	Qingsong85	Pop-3	China	Loose	C|C:C|C:A|A:A|A:C|C:G|G:A|A:T|T:G|G:G|A:T|T:C|T:A|A:T|T:T|T:C|C:G|C:A|A:C|T:G|C:C|C:G|G:T|T:G|A:G|G:G|G:T|C:G|G:T|T:C|C:G|G:C|C:A|A:A|A:G|G:A|G:A|G:A|A:C|A:T|T:T|T
CauAC321	Tainan70	Pop-3	China	Loose	C|C:C|T:A|A:A|T:C|T:G|T:A|A:T|A:G|A:G|A:T|A:C|C:A|T:T|T:T|T:C|C:G|G:A|G:C|T:G|C:C|C:G|C:T|C:G|A:G|C:G|T:T|C:G|A:T|T:G|G:G|G:C|T:A|G:A|T:G|G:A|A:A|A:A|A:C|A:T|C:T|C
CauAC322	Ningchuan75	Pop-3	China	Loose	C|C:T|C:A|A:T|A:T|C:T|G:C|A:A|T:A|G:A|G:A|T:C|C:T|A:T|T:T|T:C|C:C|G:A|A:T|C:C|G:C|C:C|G:C|T:G|G:C|G:T|G:T|T:A|G:T|T:C|C:G|G:T|C:A|A:T|A:C|G:A|A:A|A:A|A:A|C:C|T:C|T
CauAC323	Liangan85	Pop-3	China	Loose	C|C:C|T:A|A:A|T:C|T:G|T:A|C:T|A:G|G:G|A:T|A:C|T:A|A:T|C:T|T:C|C:G|G:A|G:C|T:G|C:C|C:G|G:T|T:G|A:G|G:G|G:T|T:G|G:G|G:G|G:G|G:C|C:A|G:A|T:G|C:A|A:A|A:A|A:C|A:T|C:T|C
CauAC324	Jinsheng	Pop-3	China	Loose	C|C:T|C:A|A:T|A:T|C:T|G:C|A:A|T:A|G:A|G:A|T:C|C:T|A:T|T:T|T:C|C:C|G:A|A:T|C:C|G:C|C:C|G:C|T:G|G:C|G:T|G:T|T:A|G:T|T:C|C:G|G:T|C:A|A:T|A:C|G:A|A:A|A:A|A:A|C:C|T:C|T
CauAC325	Zhenmei60	Pop-3	China	Loose	C|C:C|C:A|A:A|A:C|C:G|G:A|A:T|T:G|G:G|G:T|T:C|C:A|A:T|T:T|T:C|C:G|G:A|A:C|C:G|G:C|C:G|G:T|T:A|A:G|G:G|G:T|T:G|G:G|G:C|C:G|G:C|C:A|A:A|A:G|G:A|A:A|A:A|A:C|C:T|T:T|T
CauAC326	Xiaomili	Pop-3	China	Loose	C|C:C|T:A|A:A|T:C|T:G|T:A|C:T|A:G|A:G|A:T|A:C|C:A|T:T|T:T|T:C|C:G|C:A|A:C|T:G|C:C|C:G|C:T|C:G|G:G|C:G|T:T|T:G|A:T|T:C|C:G|G:C|T:A|A:A|T:G|C:A|A:A|A:A|A:C|A:T|C:T|C
CauAC327	Xiaomili	Pop-3	China	Loose	C|C:T|C:A|A:T|A:T|C:T|G:C|A:A|T:A|G:A|G:A|T:C|C:T|A:T|T:T|T:C|C:G|G:A|A:T|C:C|G:C|C:C|G:C|T:A|G:G|G:T|G:T|T:A|G:T|T:G|G:G|G:T|C:A|A:A|A:C|G:A|A:A|A:A|A:C|C:C|T:C|T
CauAC328	Xiaomili	Pop-3	China	Loose	C|C:C|C:A|A:A|A:C|C:G|G:A|A:T|T:G|G:G|A:T|T:C|T:A|A:T|T:T|T:C|C:G|C:A|A:C|T:G|C:C|C:G|G:T|T:G|A:G|G:G|G:T|C:G|G:T|T:C|C:G|G:C|C:A|A:A|A:G|G:A|G:A|G:A|A:C|A:T|T:T|T

## Sheet: Table S2
Table S2. Genetic information of 1662 SNPs
Chromosome	Position	ALT	REF	PIC	Minor allele frequency	Heterozygosity	GeneDiversity	Related gene	Gene description
Chr1	56660	A	T	0.384087	0.4023	0.0781893	0.502183	BOB01G000130	RNA (guanine-N7)-methylation
Chr1	67437	T	G	0.387942	0.4146	0.06893	0.505937	BOB01G000160	Belongs to the expansin family
Chr1	70396	T	C	0.393468	0.4095	0.06893	0.509316	BOB01G000170	Belongs to the FPP GGPP synthase family
Chr1	195793	T	C	0.384161	0.427	0.0627572	0.504226	BOB01G000430	Belongs to the TRAFAC class myosin-kinesin ATPase superfamily. Kinesin family
Chr1	214020	A	C	0.377182	0.4064	0.058642	0.496341	BOB01G000480	Endoglucanase
Chr1	245568	T	G	0.377987	0.4126	0.0596708	0.497917	BOB01G000510	Essential component of the vacuolar proton pump (V- ATPase), a multimeric enzyme that catalyzes the translocation of protons across the membranes. Required for assembly and activity of the V-ATPase
Chr1	249973	C	T	0.413063	0.429	0.0483539	0.524453	BOB01G000520	Belongs to the peptidase C1 family
Chr1	253908	A	G	0.381601	0.4342	0.0627572	0.50307	BOB01G000540	receptor-like protein kinase
Chr1	306558	C	A	0.388603	0.4527	0.0792181	0.509112	BOB01G000690	Belongs to the protein kinase superfamily. Ser Thr protein kinase family
Chr1	307269	A	T	0.388647	0.4228	0.06893	0.507309	BOB01G000690	Belongs to the protein kinase superfamily. Ser Thr protein kinase family
Chr1	308355	A	G	0.38637	0.4198	0.0576132	0.504748	BOB01G000690	Belongs to the protein kinase superfamily. Ser Thr protein kinase family
Chr1	333022	G	A	0.385226	0.4434	0.0658436	0.506319	BOB01G000720	Nuclear protein 96
Chr1	333250	T	C	0.39151	0.4486	0.0771605	0.511021	BOB01G000720	Nuclear protein 96
Chr1	359978	C	T	0.380123	0.4311	0.0709877	0.502121	BOB01G000760	phagosome-lysosome fusion involved in apoptotic cell clearance
Chr1	366886	A	C	0.381317	0.427	0.06893	0.502511	BOB01G000760	phagosome-lysosome fusion involved in apoptotic cell clearance
Chr1	373901	C	G	0.388475	0.392	0.0709877	0.50331	BOB01G000780	C-terminal region of MMR_HSR1 domain
Chr1	433218	G	A	0.37172	0.3683	0.0679012	0.485781	BOB01G000930	RNSP1-SAP18 binding (RSB) motif
Chr1	543611	G	C	0.39482	0.4218	0.0761317	0.511924	BOB01G001180	Belongs to the peptidase C19 family
Chr1	557023	T	C	0.395623	0.4414	0.0679012	0.51348	BOB01G001220	Pentatricopeptide repeat-containing protein
Chr1	561022	T	A	0.385602	0.4506	0.0802469	0.50706	BOB01G001230	dnaJ homolog 1
Chr1	595474	G	A	0.374285	0.4198	0.0648148	0.496548	BOB01G001340	WEB family protein At5g16730, chloroplastic-like
Chr1	711346	C	T	0.38996	0.4568	0.0534979	0.509873	BOB01G001620	Protein RMD5 homolog A-like
Chr1	860653	C	G	0.398782	0.4486	0.0740741	0.515978	BOB01G001990	N-acetyltransferase
Chr1	910139	A	T	0.380772	0.4465	0.0658436	0.503404	BOB01G002060	cell division
Chr1	920292	G	T	0.371262	0.3621	0.0606996	0.48308	BOB01G002080	tetratricopeptide repeat
Chr1	975765	C	T	0.384477	0.4187	0.0524691	0.502942	BOB01G002260	Belongs to the cytochrome P450 family
Chr1	991279	G	C	0.388546	0.3992	0.0576132	0.503446	BOB01G002330	Glycosyl transferase family 2
Chr1	1016630	T	C	0.37949	0.4352	0.0452675	0.50087	BOB01G002370	Belongs to the cytochrome P450 family
Chr1	1028494	C	T	0.379596	0.4619	0.0699588	0.503067	BOB01G002400	Indole-3-acetic acid-amido synthetase
Chr1	1028671	C	T	0.391517	0.4609	0.0534979	0.511035	BOB01G002400	Indole-3-acetic acid-amido synthetase
Chr1	1029442	A	G	0.391949	0.4228	0.0771605	0.510017	BOB01G002400	Indole-3-acetic acid-amido synthetase
Chr1	1068613	T	G	0.394051	0.4465	0.0524691	0.512259	BOB01G002490	Mortality factor 4-like protein 1
Chr1	1073093	G	A	0.38005	0.4208	0.0524691	0.500022	BOB01G002500	cadmium zinc-transporting ATPase HMA1, chloroplastic
Chr1	1104554	C	G	0.383411	0.4403	0.0596708	0.504685	BOB01G002520	LRR receptor-like serine threonine-protein kinase At4g37250
Chr1	1380955	C	T	0.387019	0.4506	0.0699588	0.507917	BOB01G003120	G-box-binding factor
Chr1	1384372	C	G	0.422248	0.4403	0.0751029	0.532169	BOB01G003130	Belongs to the GRAS family
Chr1	1385137	T	C	0.397373	0.4434	0.0915638	0.515056	BOB01G003130	Belongs to the GRAS family
Chr1	1408602	C	T	0.383465	0.4352	0.0720165	0.504793	BOB01G003200	Belongs to the major facilitator superfamily. Sugar transporter (TC 2.A.1.1) family
Chr1	1409022	A	G	0.385091	0.4342	0.0781893	0.506052	BOB01G003200	Belongs to the major facilitator superfamily. Sugar transporter (TC 2.A.1.1) family
Chr1	1409694	A	C	0.386468	0.4136	0.0720165	0.504939	BOB01G003200	Belongs to the major facilitator superfamily. Sugar transporter (TC 2.A.1.1) family
Chr1	1414639	G	C	0.382544	0.4455	0.0853909	0.504933	BOB01G003230	ATPase activity
Chr1	1540138	G	A	0.368725	0.3591	0.058642	0.48008	BOB01G003500	beta-galactosidase
Chr1	1549741	A	C	0.365375	0.3704	0.0493827	0.479219	BOB01G003520	MORC family CW-type zinc finger protein
Chr1	1581568	C	A	0.385085	0.4033	0.0668724	0.502253	BOB01G003590	Transcriptional activator that specifically binds 5'- GATA-3' or 5'-GAT-3' motifs within gene promoters
Chr1	1668146	G	A	0.38031	0.4249	0.0895062	0.502489	BOB01G003780	NB-ARC domain
Chr1	1669119	T	C	0.380826	0.4095	0.0915638	0.501546	BOB01G003790	60S ribosomal protein
Chr1	1673382	G	A	0.383945	0.3961	0.063786	0.500049	BOB01G003800	Plant protein
Chr1	1697530	C	T	0.390912	0.4228	0.0925926	0.509854	BOB01G003840	Belongs to the PI3 PI4-kinase family
Chr1	1707133	T	G	0.381698	0.4218	0.090535	0.503262	BOB01G003840	Belongs to the PI3 PI4-kinase family
Chr1	1714471	A	G	0.385632	0.4558	0.0781893	0.507119	BOB01G003860	DNA-(apurinic or apyrimidinic site) lyase
Chr1	1826625	A	C	0.386945	0.4414	0.0823045	0.507771	BOB01G004100	Belongs to the peptidase A1 family
Chr1	1827155	G	A	0.389149	0.43	0.06893	0.508287	BOB01G004100	Belongs to the peptidase A1 family
Chr1	1857544	T	G	0.392236	0.4218	0.0884774	0.510574	BOB01G004160	Catalyzes the isomerization of citrate to isocitrate via cis-aconitate
Chr1	1887163	A	G	0.395937	0.4578	0.0679012	0.51409	BOB01G004210	RNA recognition motif
Chr1	1985202	A	G	0.385548	0.4434	0.0874486	0.506952	BOB01G004440	Ankyrin repeat domain-containing protein 2-like
Chr1	1985445	T	G	0.395693	0.4352	0.0843621	0.513616	BOB01G004440	Ankyrin repeat domain-containing protein 2-like
Chr1	1986889	C	T	0.396289	0.4095	0.0658436	0.511177	BOB01G004450	Tetraketide alpha-pyrone reductase
Chr1	1991451	T	C	0.385041	0.4321	0.0802469	0.505955	BOB01G004450	Tetraketide alpha-pyrone reductase
Chr1	1992256	T	C	0.379592	0.4588	0.0740741	0.503059	BOB01G004460	F-Box protein
Chr1	2016908	T	A	0.381317	0.4311	0.0606996	0.502511	BOB01G004510	Contains the following InterPro domains WD40 repeat 2 (InterPro IPR019782), WD40 repeat, conserved site (InterPro IPR019775), WD40 repeat (InterPro IPR001680), G-protein beta WD-40 repeat, region (InterPro IPR020472), WD40 repeat-like-containing domain (InterPro IPR011046), WD40-repeat-containing domain (InterPro IPR017986), WD40 YVTN repeat-like-containing domain (InterPro IPR015943), WD40 repea…
Chr1	2017031	A	G	0.381791	0.4393	0.058642	0.503445	BOB01G004510	Contains the following InterPro domains WD40 repeat 2 (InterPro IPR019782), WD40 repeat, conserved site (InterPro IPR019775), WD40 repeat (InterPro IPR001680), G-protein beta WD-40 repeat, region (InterPro IPR020472), WD40 repeat-like-containing domain (InterPro IPR011046), WD40-repeat-containing domain (InterPro IPR017986), WD40 YVTN repeat-like-containing domain (InterPro IPR015943), WD40 repea…
Chr1	2022083	A	T	0.370903	0.3909	0.0679012	0.4899	BOB01G004520	BEST Arabidopsis thaliana protein match is Uncharacterised conserved protein (UCP030210) (TAIR
Chr1	2022902	C	T	0.376182	0.3735	0.0709877	0.490641	BOB01G004530	Belongs to the peptidase C1 family
Chr1	2030710	C	A	0.37402	0.3776	0.0740741	0.490201	BOB01G004560	Calcium-dependent protein kinase
Chr1	2031625	A	C	0.388607	0.4115	0.090535	0.507231	BOB01G004560	Calcium-dependent protein kinase
Chr1	2042327	T	C	0.386885	0.4403	0.0802469	0.507653	BOB01G004580	Glutamate-gated receptor that probably acts as non- selective cation channel
Chr1	2042477	A	T	0.380893	0.4475	0.0709877	0.503645	BOB01G004580	Glutamate-gated receptor that probably acts as non- selective cation channel
Chr1	2135338	A	C	0.380206	0.4228	0.0514403	0.500328	BOB01G004830	BEST Arabidopsis thaliana protein match is
Chr1	2135782	G	A	0.386696	0.4486	0.0534979	0.507282	BOB01G004830	BEST Arabidopsis thaliana protein match is
Chr1	2135926	G	A	0.376983	0.4074	0.0534979	0.495953	BOB01G004830	BEST Arabidopsis thaliana protein match is
Chr1	2138696	T	C	0.375864	0.4115	0.0524691	0.495703	BOB01G004840	Belongs to the MIP aquaporin (TC 1.A.8) family
Chr1	2191178	C	T	0.385538	0.4568	0.0596708	0.506933	BOB01G004980	Serine threonine-protein kinase
Chr1	2244326	T	G	0.379318	0.4126	0.0864198	0.500531	BOB01G005100	xanthine dehydrogenase
Chr1	2247881	C	G	0.386203	0.394	0.0565844	0.500752	BOB01G005100	xanthine dehydrogenase
Chr1	2248380	G	T	0.376626	0.392	0.0576132	0.493355	BOB01G005100	xanthine dehydrogenase
Chr1	2251514	C	T	0.386931	0.4455	0.0730453	0.507743	BOB01G005110	amidase family
Chr1	2657546	G	A	0.442973	0.4064	0.0473251	0.544516	BOB01G006280	Belongs to the cyclin family
Chr1	2953219	A	G	0.388552	0.464	0.0473251	0.509012	BOB01G006980	Belongs to the glycosyltransferase 8 family
Chr1	3480925	G	A	0.387672	0.4136	0.102881	0.507288	BOB01G008350	Domain present in VPS-27, Hrs and STAM
Chr1	3481405	A	G	0.382321	0.429	0.101852	0.504493	BOB01G008350	Domain present in VPS-27, Hrs and STAM
Chr1	3527498	A	C	0.389948	0.4393	0.0874486	0.509849	BOB01G008480	Helicase and polymerase-containing protein
Chr1	3529039	T	C	0.392376	0.4259	0.0853909	0.510846	BOB01G008480	Helicase and polymerase-containing protein
Chr1	3573261	C	T	0.376626	0.3827	0.0761317	0.493355	BOB01G008600	ADP-ribosylation factor GTPase-activating protein AGD14
Chr1	5375648	T	G	0.384368	0.4033	0.0812757	0.50273	BOB01G013190	polyamine oxidase 5
Chr1	5629211	A	T	0.379666	0.4136	0.0596708	0.49927	BOB01G013970	Belongs to the eukaryotic ribosomal protein eS30 family
Chr1	5630930	G	C	0.372158	0.4033	0.0606996	0.492356	BOB01G013980	protein kinase family protein WD-40 repeat
Chr1	6071624	T	G	0.380878	0.4352	0.0946502	0.503614	BOB01G015040	Belongs to the enoyl-CoA hydratase isomerase family
Chr1	6072991	T	C	0.385516	0.4414	0.0884774	0.50689	BOB01G015040	Belongs to the enoyl-CoA hydratase isomerase family
Chr1	6074000	G	T	0.389591	0.4372	0.0709877	0.509151	BOB01G015040	Belongs to the enoyl-CoA hydratase isomerase family
Chr1	6395413	C	T	0.385737	0.4023	0.0802469	0.503516	BOB01G015830	seed storage protein
Chr1	6417311	A	G	0.37556	0.4074	0.0833333	0.497072	BOB01G015920	Belongs to the protein kinase superfamily. Ser Thr protein kinase family
Chr1	6476694	T	A	0.393226	0.428	0.0606996	0.510659	BOB01G016120	phosphatase 2C
Chr1	6482312	G	A	0.384831	0.4043	0.0606996	0.501762	BOB01G016140	DNA-binding domain in plant proteins such as APETALA2 and EREBPs
Chr1	6496198	T	A	0.391465	0.4434	0.0823045	0.510934	BOB01G016160	Transcription factor
Chr1	6505485	G	T	0.384136	0.4506	0.0925926	0.506116	BOB01G016170	ubiquitin carboxyl-terminal hydrolase
Chr1	7089882	A	T	0.393025	0.4444	0.095679	0.512112	BOB01G017750	Potassium channel
Chr1	7140936	G	A	0.383808	0.4167	0.124486	0.505467	BOB01G017910	Purine nucleobase transmembrane transport
Chr1	7414868	G	A	0.372026	0.3652	0.0771605	0.486367	BOB01G018620	transcription factor
Chr1	7415522	G	A	0.385566	0.4496	0.0771605	0.506988	BOB01G018620	transcription factor
Chr1	7471848	T	C	0.393371	0.4146	0.0915638	0.510938	BOB01G018800	domain in FBox and BRCT domain containing plant proteins
Chr1	7490536	C	A	0.378985	0.4259	0.095679	0.501853	BOB01G018850	deacylase
Chr1	7494061	C	G	0.381957	0.4084	0.0843621	0.501829	BOB01G018860	RNA helicase
Chr1	7496330	T	A	0.384987	0.4033	0.0936214	0.503937	BOB01G018870	Involved in chlorophyll biosynthesis. Catalyzes the insertion of magnesium ion into protoporphyrin IX to yield Mg- protoporphyrin IX
Chr1	7555915	T	A	0.394378	0.4465	0.0730453	0.512894	BOB01G019020	Protein of unknown function (DUF707)
Chr1	7556650	A	T	0.375287	0.3796	0.0853909	0.492654	BOB01G019020	Protein of unknown function (DUF707)
Chr1	7567607	G	A	0.404261	0.4331	0.0823045	0.519465	BOB01G019050	lipase class 3 family protein
Chr1	7588408	A	C	0.379425	0.3807	0.0967078	0.496895	BOB01G019070	NA
Chr1	7589221	T	A	0.395404	0.4084	0.0802469	0.511251	BOB01G019070	NA
Chr1	7589633	C	G	0.388543	0.4496	0.0751029	0.508995	BOB01G019070	NA
Chr1	7969065	G	T	0.382617	0.4486	0.090535	0.505078	BOB01G020060	NA
Chr1	7971671	A	C	0.389845	0.392	0.0925926	0.505944	BOB01G020070	Ankyrin repeats (many copies)
Chr1	8680295	G	C	0.400039	0.4403	0.0730453	0.516616	BOB01G021970	positive regulation of bicellular tight junction assembly
Chr1	9487111	A	C	0.384821	0.43	0.0761317	0.505523	BOB01G024090	Serine threonine-protein kinase
Chr1	9492672	A	T	0.380057	0.4249	0.0812757	0.501989	BOB01G024100	G-type lectin S-receptor-like serine threonine-protein kinase
Chr1	9493451	A	T	0.377381	0.4321	0.0812757	0.500675	BOB01G024100	G-type lectin S-receptor-like serine threonine-protein kinase
Chr1	9494597	G	T	0.382782	0.4136	0.0936214	0.503448	BOB01G024100	G-type lectin S-receptor-like serine threonine-protein kinase
Chr1	14067694	T	C	0.383851	0.4043	0.0699588	0.501725	BOB01G036150	HEAT repeat-containing protein
Chr1	14580325	C	A	0.411471	0.4547	0.0627572	0.524726	BOB01G037490	O-methyltransferase
Chr1	14592481	T	A	0.379419	0.4465	0.0771605	0.502714	BOB01G037520	O-methyltransferase
Chr1	14693709	G	A	0.404388	0.4403	0.0771605	0.519708	BOB01G037860	gibberellic acid methyltransferase
Chr1	14695035	A	G	0.391454	0.4444	0.0792181	0.510913	BOB01G037860	gibberellic acid methyltransferase
Chr1	14879801	A	G	0.389796	0.4331	0.0895062	0.509553	BOB01G038310	E3 ubiquitin-protein ligase
Chr1	14898851	T	G	0.423597	0.4506	0.0617284	0.533142	BOB01G038380	Belongs to the class I-like SAM-binding methyltransferase superfamily. RsmB NOP family
Chr1	16103086	A	C	0.383653	0.392	0.0679012	0.499486	BOB01G041850	oligopeptide transporter
Chr1	16110457	T	A	0.389506	0.4064	0.0864198	0.507119	BOB01G041880	Cell division control protein 14, SIN component
Chr1	16165801	G	A	0.392967	0.4558	0.0606996	0.511998	BOB01G042010	Membrane protein of ER
Chr1	16177154	A	T	0.383264	0.4321	0.0709877	0.504396	BOB01G042050	Membrane protein of ER body-like protein
Chr1	16248238	C	G	0.384634	0.4228	0.0843621	0.505155	BOB01G042260	Voltage-dependent anion channel
Chr1	16278624	G	A	0.377907	0.4486	0.0751029	0.50172	BOB01G042370	RNA polymerase II transcription regulator recruiting activity
Chr1	16348877	G	A	0.392593	0.4383	0.0699588	0.51127	BOB01G042600	Belongs to the expansin family
Chr1	16349860	G	A	0.384908	0.4362	0.0668724	0.505693	BOB01G042600	Belongs to the expansin family
Chr1	16551295	A	T	0.392265	0.4208	0.0915638	0.51063	BOB01G043220	myb family transcription factor
Chr1	16591554	A	C	0.3897	0.4249	0.100823	0.509365	BOB01G043310	GDP-fucose protein O-fucosyltransferase
Chr1	16687943	C	T	0.388382	0.3786	0.0761317	0.501357	BOB01G043690	DWNN domain, a CCHC-type zinc finger
Chr1	16689272	A	T	0.397344	0.4455	0.0812757	0.514999	BOB01G043690	DWNN domain, a CCHC-type zinc finger
Chr1	16696364	C	G	0.385627	0.3858	0.0864198	0.501459	BOB01G043720	Formyltetrahydrofolate deformylase
Chr1	16793343	G	C	0.398651	0.4424	0.0730453	0.515724	BOB01G043990	Plant organelle RNA recognition domain
Chr1	16838092	C	A	0.392549	0.4352	0.0740741	0.511184	BOB01G044120	Ubiquitin-like domain-containing CTD phosphatase
Chr1	17942336	T	C	0.39732	0.4115	0.0843621	0.513156	BOB01G047340	Belongs to the glycosyl hydrolase 17 family
Chr1	17956177	G	T	0.395731	0.3971	0.0802469	0.510108	BOB01G047370	ABC transporter D family member 2
Chr1	18329685	A	G	0.37979	0.3704	0.0823045	0.493895	BOB01G048390	Translocase of chloroplast 159
Chr1	18329964	G	A	0.388178	0.4064	0.090535	0.506395	BOB01G048390	Translocase of chloroplast 159
Chr1	19141234	T	C	0.386885	0.4352	0.090535	0.507653	BOB01G050420	SNARE associated Golgi protein
Chr1	19161258	C	T	0.383878	0.4372	0.0874486	0.505607	BOB01G050500	amine oxidase
Chr1	19194639	C	G	0.384097	0.4527	0.0761317	0.506039	BOB01G050630	Belongs to the glycosyl hydrolase 1 family
Chr1	19233449	A	G	0.380712	0.4331	0.0895062	0.503285	BOB01G050750	Ferredoxins are iron-sulfur proteins that transfer electrons in a wide variety of metabolic reactions
Chr1	19235204	T	C	0.383096	0.4053	0.0823045	0.502144	BOB01G050760	Belongs to the cysteine synthase cystathionine beta- synthase family
Chr1	19393738	A	G	0.387794	0.4043	0.0864198	0.50565	BOB01G051220	cytochrome P450
Chr1	19715034	C	A	0.38539	0.3981	0.0823045	0.502843	BOB01G052150	atp sulfurylase 1
Chr1	19926300	T	C	0.396833	0.3745	0.0771605	0.507067	BOB01G052750	Ribonuclease H protein
Chr1	19985032	A	T	0.378881	0.3981	0.0771605	0.497735	BOB01G052910	Prolyl oligopeptidase family
Chr1	20237464	C	T	0.390036	0.4156	0.0802469	0.508148	BOB01G053610	Serine threonine-protein kinase
Chr1	32566997	G	T	0.399374	0.3426	0.0421811	0.497836	BOB01G085440	Domain of unknown function (DUF3372)
Chr1	37519042	G	A	0.455147	0.4033	0.0514403	0.553712	BOB01G100230	NA
Chr1	38223686	A	C	0.382626	0.4568	0.0771605	0.505096	BOB01G102280	DNA mismatch repair protein
Chr1	38464759	G	A	0.385312	0.4228	0.0617284	0.50457	BOB01G102940	Tudor domain
Chr1	38648639	A	T	0.391618	0.4259	0.0617284	0.509374	BOB01G103480	GPCR-chaperone
Chr1	38858088	C	T	0.385443	0.427	0.0565844	0.504826	BOB01G104040	DnaJ molecular chaperone homology domain
Chr1	38976259	C	G	0.382459	0.427	0.058642	0.502813	BOB01G104400	Belongs to the TRAFAC class myosin-kinesin ATPase superfamily. Kinesin family
Chr1	39032085	G	A	0.382966	0.4321	0.0617284	0.50381	BOB01G104490	Belongs to the glycosyl hydrolase 31 family
Chr1	41008491	G	C	0.370903	0.3827	0.0843621	0.4899	BOB01G109940	NA
Chr1	41164368	C	T	0.378599	0.392	0.0627572	0.495294	BOB01G110180	may be involved in a number of diverse aspects of plant physiology including growth and development, pest resistance, and senescence or responses to wounding
Chr1	41203358	A	G	0.382962	0.3848	0.0730453	0.498157	BOB01G110250	time for
Chr1	41204327	A	G	0.388608	0.4465	0.0936214	0.509122	BOB01G110250	time for
Chr1	41205044	G	T	0.380086	0.3868	0.0720165	0.496302	BOB01G110250	time for
Chr1	41799573	G	C	0.393916	0.4208	0.0555556	0.510178	BOB01G112090	MatE
Chr1	43049148	A	T	0.379692	0.43	0.0606996	0.50127	BOB01G115680	disease resistance
Chr1	44336179	G	T	0.447117	0.428	0.0514403	0.549342	BOB01G119190	endonuclease activity
Chr1	45449565	T	A	0.37875	0.4156	0.0679012	0.499414	BOB01G122430	Belongs to the group II decarboxylase family
Chr1	45594917	C	A	0.385453	0.4414	0.0833333	0.506766	BOB01G122810	Cyclic nucleotide-gated ion channel 20
Chr1	46205786	G	C	0.386881	0.4115	0.0853909	0.505744	BOB01G124720	Ribosomal protein S6
Chr1	46214098	G	A	0.385342	0.4383	0.0823045	0.506548	BOB01G124740	cell wall vacuolar inhibitor of fructosidase
Chr1	46286496	A	T	0.41003	0.4424	0.0751029	0.523658	BOB01G125000	Transcription factor
Chr1	46390741	G	C	0.392596	0.3879	0.0534979	0.504147	BOB01G125300	Cell division control protein 24, OB domain 2
Chr1	46445810	C	T	0.385453	0.4455	0.0751029	0.506766	BOB01G125440	DEAD-box ATP-dependent RNA helicase
Chr1	46545060	A	G	0.380206	0.4167	0.063786	0.500328	BOB01G125740	Topless-related
Chr1	48908251	C	G	0.422799	0.4187	0.0730453	0.531658	BOB01G132720	Transcription factor
Chr1	48927591	T	G	0.407287	0.4362	0.0946502	0.521812	BOB01G132770	Belongs to the peptidase S8 family
Chr1	49049810	C	G	0.38187	0.3909	0.0895062	0.499755	BOB01G133160	Belongs to the DEAD box helicase family
Chr1	49077093	C	T	0.377704	0.3786	0.0781893	0.493565	BOB01G133250	RNA polymerase II transcription regulator recruiting activity
Chr1	49187409	C	G	0.380989	0.3642	0.0740741	0.492599	BOB01G133570	Belongs to the glycosyl hydrolase 32 family
Chr1	49730040	A	T	0.381081	0.4352	0.0462963	0.502048	BOB01G135030	Belongs to the Ca(2 ) cation antiporter (CaCA) (TC 2.A.19) family
Chr1	49775181	C	T	0.383823	0.4239	0.0606996	0.503565	BOB01G135180	ABC transporter
Chr1	49777239	A	G	0.382957	0.4033	0.0576132	0.499992	BOB01G135180	ABC transporter
Chr1	49799948	G	T	0.390081	0.4619	0.0596708	0.51011	BOB01G135250	PPR repeat
Chr1	49884395	G	C	0.382889	0.3951	0.0730453	0.49986	BOB01G135450	histone acetyl-transferase
Chr1	49886494	A	G	0.384354	0.4198	0.0823045	0.504604	BOB01G135450	histone acetyl-transferase
Chr1	50115062	A	G	0.385889	0.3837	0.0730453	0.500151	BOB01G136110	Catalyzes the ATP-dependent amination of UTP to CTP with either L-glutamine or ammonia as the source of nitrogen
Chr1	50121931	G	A	0.385634	0.4455	0.0997942	0.507122	BOB01G136120	Fasciclin domain
Chr1	50149156	C	T	0.403763	0.427	0.0720165	0.51851	BOB01G136210	heat shock protein 70
Chr1	50384940	T	G	0.387066	0.4372	0.101852	0.50801	BOB01G136800	Leucine rich repeat N-terminal domain
Chr1	50566315	G	T	0.405231	0.3652	0.0740741	0.511442	BOB01G137300	Catalyzes the conversion of 7,8-dihydroneopterin to 6- hydroxymethyl-7,8-dihydropterin
Chr1	50579750	C	A	0.404314	0.4115	0.0771605	0.517848	BOB01G137340	fasciclin-like arabinogalactan protein
Chr1	50626425	C	T	0.372089	0.392	0.0823045	0.49222	BOB01G137490	2-Cys peroxiredoxin
Chr1	50627469	G	A	0.382088	0.428	0.0925926	0.504033	BOB01G137490	2-Cys peroxiredoxin
Chr1	50782982	T	C	0.387704	0.4136	0.103909	0.50735	BOB01G137960	Splicing factor 3B subunit 3-like
Chr1	50784356	G	A	0.37806	0.4506	0.0895062	0.502025	BOB01G137970	Belongs to the yippee family
Chr1	51372443	G	A	0.387825	0.4362	0.0627572	0.507587	BOB01G139540	Glycerol-3-phosphate dehydrogenase
Chr1	51455404	C	G	0.383492	0.4342	0.0751029	0.504845	BOB01G139760	Catalyzes conversion of folates to polyglutamate derivatives allowing concentration of folate compounds in the cell and the intracellular retention of these cofactors, which are important substrates for most of the folate-dependent enzymes that are involved in one-carbon transfer reactions involved in purine, pyrimidine and amino acid synthesis
Chr1	51524986	G	A	0.388085	0.4177	0.0658436	0.506215	BOB01G139960	receptor-like protein kinase
Chr1	51525902	C	T	0.389658	0.4372	0.0740741	0.509283	BOB01G139960	receptor-like protein kinase
Chr1	51526959	A	G	0.381805	0.4053	0.0596708	0.49963	BOB01G139960	receptor-like protein kinase
Chr1	51529780	C	T	0.384067	0.4547	0.0679012	0.50598	BOB01G139960	receptor-like protein kinase
Chr1	51530985	C	T	0.377869	0.4146	0.0534979	0.497686	BOB01G139960	receptor-like protein kinase
Chr1	51565649	T	G	0.380506	0.3951	0.0843621	0.498994	BOB01G140060	protein transport
Chr1	51586728	T	A	0.385589	0.4444	0.090535	0.507034	BOB01G140110	Belongs to the peroxidase family
Chr1	51589575	A	G	0.418182	0.4414	0.0679012	0.529264	BOB01G140120	60S ribosomal protein
Chr1	51813122	A	C	0.382416	0.4156	0.0802469	0.502729	BOB01G140840	Defective in exine formation
Chr1	51813471	A	T	0.392908	0.4414	0.0833333	0.511884	BOB01G140840	Defective in exine formation
Chr1	51815173	A	T	0.389796	0.4444	0.0668724	0.509553	BOB01G140850	Protein of unknown function (DUF962)
Chr1	51997055	A	G	0.392656	0.4352	0.0792181	0.511393	BOB01G141320	multicellular organism development
Chr1	52201833	C	T	0.392081	0.357	0.037037	0.495057	BOB01G141830	Exosome complex component RRP42-like
Chr1	52562875	C	A	0.381567	0.4249	0.0802469	0.503004	BOB01G142810	Galactokinase galactose-binding signature
Chr1	52563012	T	G	0.382584	0.4167	0.0823045	0.503059	BOB01G142810	Galactokinase galactose-binding signature
Chr1	52569106	A	T	0.390052	0.4403	0.0967078	0.510053	BOB01G142820	Rab GDP-dissociation inhibitor activity
Chr1	53192645	A	T	0.388599	0.4496	0.0843621	0.509105	BOB01G144350	Integral membrane Yip1 family protein
Chr1	53223851	T	C	0.391524	0.4712	0.0339506	0.511049	BOB01G144420	Belongs to the 'GDSL' lipolytic enzyme family
Chr1	53401848	A	G	0.401609	0.4342	0.0967078	0.517869	BOB01G144710	At2g34160-like
Chr1	53480072	A	C	0.389441	0.4239	0.0915638	0.508859	BOB01G144890	Pentatricopeptide repeat-containing protein
Chr1	54977654	C	A	0.38858	0.4609	0.0576132	0.509067	BOB01G147460	Belongs to the histidine acid phosphatase family
Chr2	1985048	G	A	0.374986	0.356	0.0504115	0.483049	BOB02G004190	Fatty acid amide
Chr2	2005080	G	A	0.389953	0.4177	0.0740741	0.507987	BOB02G004230	oligopeptide transporter
Chr2	2005230	A	G	0.392858	0.4414	0.0792181	0.511786	BOB02G004230	oligopeptide transporter
Chr2	2230365	A	G	0.391475	0.4516	0.0668724	0.510953	BOB02G004660	Introduces a single-strand break via transesterification at a target site in duplex DNA. Releases the supercoiling and torsional tension of DNA introduced during the DNA replication and transcription by transiently cleaving and rejoining one strand of the DNA duplex. The scissile phosphodiester is attacked by the catalytic tyrosine of the enzyme, resulting in the formation of a DNA-(5'-phosphotyr…
Chr2	2233097	A	C	0.394473	0.4516	0.0761317	0.51308	BOB02G004660	Introduces a single-strand break via transesterification at a target site in duplex DNA. Releases the supercoiling and torsional tension of DNA introduced during the DNA replication and transcription by transiently cleaving and rejoining one strand of the DNA duplex. The scissile phosphodiester is attacked by the catalytic tyrosine of the enzyme, resulting in the formation of a DNA-(5'-phosphotyr…
Chr2	2253028	G	A	0.379207	0.3858	0.0833333	0.496471	BOB02G004720	Amino acid permease
Chr2	3174530	A	G	0.405537	0.43	0.0802469	0.52018	BOB02G007060	LIM-domain binding protein
Chr2	3174692	T	G	0.407672	0.4187	0.0761317	0.520853	BOB02G007060	LIM-domain binding protein
Chr2	3223839	G	T	0.388647	0.4177	0.0792181	0.507309	BOB02G007180	Signal-recognition-particle assembly has a crucial role in targeting secretory proteins to the rough endoplasmic reticulum membrane
Chr2	3257724	G	T	0.39585	0.4506	0.0658436	0.513921	BOB02G007210	BEST Arabidopsis thaliana protein match is Ubiquitin carboxyl-terminal hydrolase-related protein (TAIR
Chr2	3262267	C	T	0.387058	0.4547	0.0658436	0.507993	BOB02G007220	calcium-dependent phospholipid binding
Chr2	3315313	G	A	0.375224	0.3652	0.0617284	0.487	BOB02G007350	Calnexin
Chr2	5528180	G	A	0.385324	0.4383	0.0812757	0.506512	BOB02G013000	U-box domain-containing protein
Chr2	6326547	C	A	0.380624	0.4444	0.0627572	0.503111	BOB02G015200	DNA-binding transcription factor activity
Chr2	6347989	G	A	0.381409	0.3848	0.0730453	0.497002	BOB02G015270	RNA polymerase II transcription regulator recruiting activity
Chr2	6837604	T	G	0.375287	0.3786	0.0874486	0.492654	BOB02G016570	3-ketoacyl-coa synthase
Chr2	7045701	A	T	0.386717	0.4393	0.0730453	0.507324	BOB02G017160	Belongs to the cyclin family
Chr2	7076272	G	A	0.385505	0.4475	0.0751029	0.506868	BOB02G017260	GTP cyclohydrolase
Chr2	7486900	G	C	0.384049	0.4506	0.0740741	0.505944	BOB02G018400	Belongs to the TRAFAC class myosin-kinesin ATPase superfamily. Kinesin family
Chr2	7488558	A	T	0.401652	0.4506	0.0699588	0.517951	BOB02G018400	Belongs to the TRAFAC class myosin-kinesin ATPase superfamily. Kinesin family
Chr2	7495893	A	G	0.387105	0.4506	0.0812757	0.508086	BOB02G018410	2,3-bisphosphoglycerate-independent phosphoglycerate mutase
Chr2	7583079	G	A	0.383568	0.4321	0.0823045	0.504996	BOB02G018620	amino acid transporter
Chr2	7835192	T	G	0.388567	0.4218	0.06893	0.507152	BOB02G019290	acetyltransferase At3g50280-like
Chr2	7856345	C	A	0.416672	0.4414	0.0565844	0.528024	BOB02G019380	at5g67360 (e 0.0) ara12 ara12
Chr2	8478399	A	C	0.395885	0.4578	0.0555556	0.513988	BOB02G021310	NA
Chr2	8655918	T	A	0.387127	0.466	0.0596708	0.508129	BOB02G021810	Belongs to the cytochrome P450 family
Chr2	8658199	G	A	0.380319	0.3817	0.0853909	0.496751	BOB02G021820	Component of the FACT complex, a general chromatin factor that acts to reorganize nucleosomes. The FACT complex is involved in multiple processes that require DNA as a template such as mRNA elongation, DNA replication and DNA repair. During transcription elongation the FACT complex acts as a histone chaperone that both destabilizes and restores nucleosomal structure. It facilitates the passage of…
Chr2	8662444	G	C	0.378948	0.4136	0.0761317	0.499803	BOB02G021830	Subunit of the integral membrane V0 complex of vacuolar ATPase. Vacuolar ATPase is responsible for acidifying a variety of intracellular compartments in eukaryotic cells, thus providing most of the energy required for transport processes in the vacuolar system
Chr2	8666499	C	A	0.381858	0.4105	0.0781893	0.501636	BOB02G021840	belongs to the protein kinase superfamily
Chr2	8823109	A	G	0.393632	0.4249	0.0792181	0.511447	BOB02G022320	Glycosyl transferase family 21
Chr2	9814457	G	A	0.385952	0.4259	0.0720165	0.505824	BOB02G025050	Phosphoglycerate mutase family protein
Chr2	10099805	A	G	0.389567	0.43	0.0843621	0.509105	BOB02G025930	NA
Chr2	11413361	A	C	0.382543	0.4187	0.0771605	0.502978	BOB02G029870	NA
Chr2	11415206	T	A	0.400964	0.428	0.0730453	0.516628	BOB02G029880	Hsp90 protein
Chr2	12161302	T	G	0.383411	0.4249	0.090535	0.504685	BOB02G032050	CONTAINS InterPro DOMAIN s SPX, N-terminal (InterPro IPR004331), EXS, C-terminal (InterPro IPR004342)
Chr2	12161494	A	T	0.388132	0.4064	0.0895062	0.506306	BOB02G032050	CONTAINS InterPro DOMAIN s SPX, N-terminal (InterPro IPR004331), EXS, C-terminal (InterPro IPR004342)
Chr2	13504686	T	G	0.397821	0.4064	0.0730453	0.512355	BOB02G035770	Belongs to the protein kinase superfamily. Ser Thr protein kinase family
Chr2	13504866	T	C	0.396042	0.4198	0.0730453	0.512482	BOB02G035770	Belongs to the protein kinase superfamily. Ser Thr protein kinase family
Chr2	13927132	T	A	0.371505	0.3765	0.0658436	0.487233	BOB02G036870	NA
Chr2	13959435	A	G	0.382261	0.3714	0.0730453	0.495014	BOB02G037000	Quinolinate phosphoribosyl transferase, N-terminal domain
Chr2	14297682	G	A	0.380909	0.4578	0.0514403	0.503675	BOB02G038120	PA domain
Chr2	14360081	A	G	0.485621	0.3673	0.0679012	0.575075	BOB02G038350	Vacuolar protein sorting 55
Chr2	15937879	A	G	0.404399	0.4403	0.0781893	0.519729	BOB02G043250	AWPM-19-like membrane family protein
Chr2	19016152	C	A	0.407192	0.43	0.095679	0.521632	BOB02G052230	Auxin-repressed 12.5 kDa
Chr2	33857631	G	A	0.382448	0.3704	0.0771605	0.49537	BOB02G081570	Myb-like DNA-binding domain
Chr2	37743184	C	A	0.408652	0.4465	0.06893	0.522719	BOB02G094020	NA
Chr2	37825263	A	T	0.386347	0.3519	0.090535	0.495783	BOB02G094200	Serine threonine-protein kinase
Chr2	38067884	G	T	0.382544	0.4434	0.0895062	0.504933	BOB02G094890	May be involved in modulation of pathogen defense and leaf cell death
Chr2	38143448	T	C	0.3928	0.4259	0.105967	0.511672	BOB02G095210	Ribonuclease H protein
Chr2	38195528	T	C	0.420495	0.4259	0.0740741	0.530449	BOB02G095380	Belongs to the TRAFAC class myosin-kinesin ATPase superfamily. Kinesin family
Chr2	38333396	T	A	0.376295	0.3724	0.0925926	0.492716	BOB02G095740	BEST Arabidopsis thaliana protein match is U3 ribonucleoprotein (Utp) family protein (TAIR
Chr2	38334544	A	G	0.385121	0.3817	0.0874486	0.500484	BOB02G095740	BEST Arabidopsis thaliana protein match is U3 ribonucleoprotein (Utp) family protein (TAIR
Chr2	38337944	T	A	0.379639	0.3837	0.0936214	0.497309	BOB02G095750	poly ADP-ribose polymerase
Chr2	38523184	T	A	0.379692	0.4198	0.0812757	0.50127	BOB02G096210	Importin subunit
Chr2	39132555	T	C	0.408667	0.4434	0.0771605	0.522746	BOB02G098080	NA
Chr2	39133269	C	T	0.416897	0.4444	0.0709877	0.528447	BOB02G098080	NA
Chr2	39136543	C	T	0.388282	0.4372	0.0802469	0.508482	BOB02G098100	Aluminium activated malate transporter
Chr2	39230790	T	A	0.404666	0.3827	0.0668724	0.513552	BOB02G098320	snoRNA splicing
Chr2	39263221	G	A	0.394153	0.4331	0.0843621	0.512458	BOB02G098440	Belongs to the UDP-glycosyltransferase family
Chr2	39653853	G	A	0.380506	0.394	0.0864198	0.498994	BOB02G099510	Fringe-related protein
Chr2	39714908	A	T	0.394299	0.4074	0.0606996	0.509129	BOB02G099680	Belongs to the universal ribosomal protein uS5 family
Chr2	39801662	A	T	0.376814	0.4115	0.06893	0.497566	BOB02G099830	Translational activator
Chr2	39814773	C	T	0.377565	0.4053	0.0668724	0.497091	BOB02G099840	Belongs to the protein kinase superfamily. Ser Thr protein kinase family
Chr2	39815235	T	C	0.380456	0.4105	0.0812757	0.500818	BOB02G099840	Belongs to the protein kinase superfamily. Ser Thr protein kinase family
Chr2	39991420	C	G	0.395899	0.4516	0.0699588	0.514016	BOB02G100430	Domain of unknown function (DUF4666)
Chr2	40999948	T	C	0.397439	0.4198	0.0709877	0.513387	BOB02G103360	NA
Chr2	41158279	T	G	0.384114	0.4414	0.101852	0.506073	BOB02G103770	DNA repair protein recA
Chr2	43724784	T	C	0.380772	0.429	0.100823	0.503404	BOB02G110890	Ribonuclease P protein subunit p25-like
Chr2	43756644	A	T	0.385527	0.4095	0.0936214	0.504991	BOB02G111020	Belongs to the glycosyl hydrolase 1 family
Chr2	43785247	C	T	0.386816	0.43	0.0967078	0.507517	BOB02G111100	Plays a role in vesicular protein sorting
Chr2	52539575	C	T	0.380242	0.3909	0.0658436	0.496602	BOB02G135240	cdp-diacylglycerol--inositol 3-phosphatidyltransferase
Chr2	52569101	T	G	0.387343	0.3909	0.0576132	0.501143	BOB02G135360	caffeoyl-CoA O-methyltransferase
Chr2	52690898	C	G	0.3788	0.4136	0.0730453	0.499513	BOB02G135690	phosphatase 2C
Chr2	53038224	A	T	0.378073	0.465	0.0679012	0.502051	BOB02G136580	may be involved in a number of diverse aspects of plant physiology including growth and development, pest resistance, and senescence or responses to wounding
Chr2	53538230	A	G	0.385306	0.3858	0.185185	0.506476	BOB02G137960	Nuclear matrix constituent protein 1-like
Chr2	53610033	G	A	0.468139	0.4239	0.06893	0.564989	BOB02G138180	transposition, RNA-mediated
Chr2	53615294	A	T	0.396977	0.3951	0.0802469	0.510743	BOB02G138190	FLX-like 2
Chr2	55631278	C	G	0.388982	0.4311	0.0617284	0.507962	BOB02G143480	Pentatricopeptide repeat-containing protein
Chr2	57890924	A	G	0.430809	0.3498	0.0565844	0.52682	BOB02G149460	NA
Chr2	58399186	C	A	0.386433	0.3848	0.0781893	0.501192	BOB02G150930	Ribosomal protein L11 methyltransferase (PrmA)
Chr2	59376807	C	A	0.384049	0.4681	0.0390947	0.505944	BOB02G153500	Aspartokinase
Chr2	59524882	G	T	0.379881	0.4249	0.0761317	0.501643	BOB02G153810	Swap (Suppressor-of-White-APricot) surp domain-containing protein
Chr2	60165642	T	C	0.393001	0.4578	0.0617284	0.512064	BOB02G155680	Belongs to the ubiquitin-conjugating enzyme family
Chr2	63820273	A	G	0.386219	0.3992	0.095679	0.504454	BOB02G165280	Belongs to the cytochrome P450 family
Chr2	63821183	A	C	0.385633	0.3621	0.0781893	0.496149	BOB02G165290	Leucine rich repeat N-terminal domain
Chr2	64603346	T	G	0.382373	0.3848	0.193416	0.504596	BOB02G167290	DYW family of nucleic acid deaminases
Chr2	65005201	C	T	0.385988	0.4239	0.0771605	0.505893	BOB02G168230	phosphoinositide phosphatase family protein
Chr2	65884789	G	T	0.377439	0.393	0.0895062	0.496845	BOB02G170650	Telomerase activating protein Est1
Chr2	65960713	T	C	0.380791	0.43	0.0997942	0.503442	BOB02G170840	ATP binding calcium ion binding calmodulin-dependent protein kinase kinase protein kinase protein serine threonine kinase
Chr2	65971303	C	A	0.390967	0.4074	0.0833333	0.508111	BOB02G170880	NA
Chr2	66045832	A	T	0.372336	0.3724	0.0833333	0.488838	BOB02G171040	GPI-anchored protein
Chr2	66319863	T	C	0.379361	0.4146	0.0833333	0.500618	BOB02G171800	belongs to the protein kinase superfamily
Chr2	66446250	T	G	0.379091	0.4136	0.0792181	0.500084	BOB02G172150	Pentatricopeptide repeat-containing protein
Chr2	66448342	A	G	0.381391	0.4177	0.0895062	0.502657	BOB02G172160	NA
Chr2	66467510	T	C	0.379551	0.4012	0.0823045	0.499045	BOB02G172250	Belongs to the 'GDSL' lipolytic enzyme family
Chr2	67725950	G	T	0.381066	0.4465	0.0884774	0.503986	BOB02G175280	Belongs to the ClpA ClpB family
Chr2	68269219	A	T	0.384119	0.4547	0.0761317	0.506082	BOB02G176810	Belongs to the peroxidase family. Classical plant (class III) peroxidase subfamily
Chr2	68280622	G	A	0.403044	0.4496	0.0668724	0.51887	BOB02G176860	Belongs to the mitochondrial carrier (TC 2.A.29) family
Chr2	68283273	A	T	0.391493	0.4547	0.0627572	0.510989	BOB02G176870	TRAP proteins are part of a complex whose function is to bind calcium to the ER membrane and thereby regulate the retention of ER resident proteins
Chr2	68330176	T	A	0.377183	0.3848	0.0792181	0.494433	BOB02G176970	Alpha/beta hydrolase family
Chr2	68337928	C	A	0.429993	0.3652	0.0565844	0.529192	BOB02G176990	Belongs to the CTL (choline transporter-like) family
Chr2	68910434	G	T	0.416356	0.4311	0.0617284	0.527428	BOB02G178290	NA
Chr2	68913467	C	G	0.391242	0.4218	0.0606996	0.508645	BOB02G178300	Serine threonine-protein kinase
Chr2	68914122	G	A	0.389415	0.4311	0.0761317	0.508806	BOB02G178300	Serine threonine-protein kinase
Chr2	68918812	T	G	0.386657	0.4074	0.0884774	0.505307	BOB02G178310	BEST Arabidopsis thaliana protein match is
Chr2	68953571	C	A	0.383202	0.4198	0.0936214	0.504273	BOB02G178420	ENTH domain
Chr2	68962873	G	C	0.394051	0.4444	0.0565844	0.512259	BOB02G178440	malic enzyme
Chr2	69462985	G	A	0.38698	0.4105	0.058642	0.50407	BOB02G179700	RPR
Chr2	69463729	C	T	0.392918	0.4095	0.058642	0.508257	BOB02G179700	RPR
Chr2	70129853	G	A	0.391983	0.4321	0.0596708	0.510083	BOB02G181230	Gamma-tubulin complex is necessary for microtubule nucleation at the centrosome
Chr2	70380486	G	A	0.391085	0.4342	0.0771605	0.510191	BOB02G181690	Anaphase-promoting complex subunit 1
Chr2	71593254	T	A	0.398123	0.4126	0.0668724	0.512933	BOB02G183950	receptor kinase
Chr2	71700470	C	A	0.384024	0.3889	0.058642	0.49838	BOB02G184200	EXPRESSED DURING 14 growth stages
Chr3	248412	T	A	0.381997	0.3992	0.0751029	0.500003	BOB03G000640	Belongs to the Ca(2 ) cation antiporter (CaCA) (TC 2.A.19) family
Chr3	251657	A	C	0.388608	0.4516	0.0833333	0.509122	BOB03G000640	Belongs to the Ca(2 ) cation antiporter (CaCA) (TC 2.A.19) family
Chr3	490682	A	T	0.375736	0.3971	0.0792181	0.495451	BOB03G001110	BEST Arabidopsis thaliana protein match is Protein of
Chr3	539680	C	G	0.380165	0.3683	0.110082	0.496453	BOB03G001260	F-box kelch-repeat protein
Chr3	539794	A	G	0.392526	0.4156	0.11214	0.511139	BOB03G001260	F-box kelch-repeat protein
Chr3	1098482	T	C	0.392975	0.4558	0.0617284	0.512013	BOB03G002670	Oligouridylate-binding protein
Chr3	1100008	G	A	0.381111	0.4588	0.0730453	0.504077	BOB03G002670	Oligouridylate-binding protein
Chr3	1426483	T	A	0.379405	0.4588	0.0514403	0.502686	BOB03G003430	Mechanosensitive channel of small conductance-like
Chr3	1428107	C	T	0.375991	0.4053	0.0668724	0.495951	BOB03G003430	Mechanosensitive channel of small conductance-like
Chr3	1872608	G	T	0.38847	0.4568	0.0534979	0.508851	BOB03G004650	Protein of unknown function (DUF616)
Chr3	1892346	A	T	0.383302	0.4156	0.0658436	0.502547	BOB03G004700	Binds to the 60S ribosomal subunit and prevents its association with the 40S ribosomal subunit to form the 80S initiation complex in the cytoplasm. May also be involved in ribosome biogenesis
Chr3	1915822	T	A	0.382064	0.4331	0.0812757	0.503985	BOB03G004770	protein modification by small protein conjugation
Chr3	2893280	T	G	0.381165	0.4002	0.0853909	0.500281	BOB03G007200	ATP-dependent RNA helicase
Chr3	2921871	T	G	0.384083	0.4527	0.0740741	0.506012	BOB03G007270	cinnamoyl-CoA reductase 1-like
Chr3	2924468	G	C	0.367503	0.3735	0.063786	0.483304	BOB03G007280	Sucrose-phosphatase 1
Chr3	2949284	C	T	0.39283	0.4455	0.06893	0.511731	BOB03G007390	electron transfer flavoprotein
Chr3	3076536	C	G	0.381463	0.429	0.06893	0.502799	BOB03G007750	Probably inactive leucine-rich repeat receptor-like protein kinase At1g50610
Chr3	3077016	C	T	0.380506	0.3981	0.0781893	0.498994	BOB03G007750	Probably inactive leucine-rich repeat receptor-like protein kinase At1g50610
Chr3	3077289	G	C	0.385341	0.3981	0.0576132	0.500908	BOB03G007750	Probably inactive leucine-rich repeat receptor-like protein kinase At1g50610
Chr3	3077918	C	T	0.368962	0.3663	0.0462963	0.480528	BOB03G007750	Probably inactive leucine-rich repeat receptor-like protein kinase At1g50610
Chr3	3113581	A	G	0.3871	0.4516	0.0781893	0.508076	BOB03G007860	Belongs to the hexokinase family
Chr3	3129495	A	T	0.377932	0.4218	0.0720165	0.499769	BOB03G007910	dwf5, pa, le, st7r, 7red dwf5 (dwarf 5)
Chr3	3129821	T	C	0.381077	0.3807	0.058642	0.494547	BOB03G007910	dwf5, pa, le, st7r, 7red dwf5 (dwarf 5)
Chr3	3132067	A	T	0.378436	0.4228	0.0833333	0.500767	BOB03G007910	dwf5, pa, le, st7r, 7red dwf5 (dwarf 5)
Chr3	4150826	G	C	0.378056	0.4239	0.0709877	0.500015	BOB03G010410	Belongs to the peptidase C19 family
Chr3	4152624	T	C	0.372158	0.3951	0.0771605	0.492356	BOB03G010410	Belongs to the peptidase C19 family
Chr3	4379152	G	A	0.385453	0.4342	0.0977366	0.506766	BOB03G011180	DDB1- and CUL4-associated factor homolog 1-like
Chr3	4379959	G	T	0.383851	0.4002	0.0781893	0.501725	BOB03G011180	DDB1- and CUL4-associated factor homolog 1-like
Chr3	4803574	T	C	0.383104	0.4198	0.090535	0.504081	BOB03G012330	Vesicle-associated membrane protein
Chr3	4803872	G	A	0.380964	0.4414	0.0884774	0.503785	BOB03G012330	Vesicle-associated membrane protein
Chr3	5298252	A	C	0.386881	0.4198	0.06893	0.505744	BOB03G013690	belongs to the protein kinase superfamily
Chr3	5307182	G	C	0.398862	0.4043	0.06893	0.512606	BOB03G013710	Cotton fibre expressed protein
Chr3	5307317	A	G	0.391863	0.4084	0.06893	0.508024	BOB03G013710	Cotton fibre expressed protein
Chr3	5331799	T	C	0.382122	0.3992	0.0771605	0.500246	BOB03G013820	homeobox-leucine zipper protein
Chr3	5332075	C	T	0.385557	0.3889	0.0792181	0.501323	BOB03G013820	homeobox-leucine zipper protein
Chr3	5447357	A	G	0.3747	0.393	0.0720165	0.493427	BOB03G014110	repeat-containing protein
Chr3	5448665	G	T	0.385507	0.4074	0.0658436	0.503072	BOB03G014120	F-box LRR-repeat protein
Chr3	5481797	G	A	0.386778	0.4321	0.090535	0.507443	BOB03G014190	component of the eukaryotic translation initiation factor 3 (eIF-3) complex, which is involved in protein synthesis of a specialized repertoire of mRNAs and, together with other initiation factors, stimulates binding of mRNA and methionyl-tRNAi to the 40S ribosome. The eIF-3 complex specifically targets and initiates translation of a subset of mRNAs involved in cell proliferation
Chr3	5581542	T	C	0.387367	0.4053	0.0504115	0.502987	BOB03G014490	PRP1 splicing factor, N-terminal
Chr3	5582355	C	A	0.380933	0.4105	0.0606996	0.499828	BOB03G014490	PRP1 splicing factor, N-terminal
Chr3	5641249	A	G	0.375782	0.3868	0.0576132	0.491725	BOB03G014620	GAD domain
Chr3	5672782	C	A	0.379309	0.4599	0.0432099	0.502496	BOB03G014690	Catalyzes the reduction of fatty acyl-CoA to fatty alcohols
Chr3	5674447	G	T	0.385393	0.4558	0.0504115	0.506648	BOB03G014690	Catalyzes the reduction of fatty acyl-CoA to fatty alcohols
Chr3	5724053	C	T	0.441428	0.4465	0.0504115	0.545699	BOB03G014780	NA
Chr3	5727913	C	T	0.440207	0.4506	0.0483539	0.544845	BOB03G014780	NA
Chr3	6005226	T	C	0.376788	0.393	0.0576132	0.493668	BOB03G015530	CBS domain-containing protein CBSX2
Chr3	6227305	A	T	0.381758	0.4198	0.0576132	0.501439	BOB03G016210	extra-large GTP-binding protein 2
Chr3	6258017	G	A	0.37329	0.3879	0.0452675	0.488795	BOB03G016270	NA
Chr3	6272348	G	T	0.419253	0.4074	0.0452675	0.526607	BOB03G016280	Proline-rich receptor-like protein kinase PERK5
Chr3	8092681	G	C	0.388605	0.4671	0.0514403	0.509117	BOB03G021240	Cytosolic domain of 10TM putative phosphate transporter
Chr3	8177000	T	C	0.393025	0.4733	0.0380658	0.512112	BOB03G021500	Pectate lyase
Chr3	8968135	A	T	0.388573	0.4702	0.0380658	0.509054	BOB03G023520	receptor-mediated endocytosis
Chr3	8968720	T	A	0.397029	0.4496	0.0483539	0.514389	BOB03G023520	receptor-mediated endocytosis
Chr3	8985334	T	C	0.390003	0.464	0.0432099	0.509958	BOB03G023560	Ethylene-responsive nuclear protein ethylene-regulated nuclear protein (ERT2)
Chr3	10040607	G	A	0.401006	0.427	0.037037	0.514969	BOB03G026980	Transglutaminase-like superfamily
Chr3	11533249	G	C	0.398789	0.4516	0.06893	0.51599	BOB03G031220	Cupin
Chr3	11534469	C	A	0.388605	0.4619	0.0617284	0.509117	BOB03G031220	Cupin
Chr3	11589038	T	C	0.39293	0.4486	0.0709877	0.511926	BOB03G031460	Belongs to the peptidase M24B family
Chr3	11590969	G	T	0.375694	0.3879	0.0545267	0.491556	BOB03G031460	Belongs to the peptidase M24B family
Chr3	11640895	T	C	0.387844	0.4239	0.0483539	0.505747	BOB03G031620	BEL1-like homeodomain
Chr3	11700659	T	A	0.37862	0.4043	0.0606996	0.497227	BOB03G031750	Protein of unknown function, DUF547
Chr3	11700925	A	T	0.378647	0.4208	0.0555556	0.499213	BOB03G031750	Protein of unknown function, DUF547
Chr3	11744657	A	G	0.380568	0.4177	0.0401235	0.499117	BOB03G031850	membrane protein At3g27390
Chr3	11853821	C	A	0.380601	0.4352	0.0802469	0.503065	BOB03G032200	RNA polymerase II transcription regulator recruiting activity
Chr3	11908500	A	G	0.384272	0.3848	0.0514403	0.497064	BOB03G032370	Belongs to the cytochrome P450 family
Chr3	11909831	G	C	0.398945	0.428	0.0555556	0.514511	BOB03G032370	Belongs to the cytochrome P450 family
Chr3	12442495	C	T	0.39125	0.4475	0.058642	0.510513	BOB03G034160	NA
Chr3	13247105	A	G	0.375518	0.4434	0.0483539	0.498993	BOB03G036410	Belongs to the mitochondrial carrier (TC 2.A.29) family
Chr3	13376818	G	A	0.379953	0.4403	0.0473251	0.501785	BOB03G036670	Involved in the retrieval of endoplasmic reticulum membrane proteins from the early Golgi compartment
Chr3	13378652	C	A	0.39543	0.4084	0.0524691	0.509534	BOB03G036680	40s ribosomal protein
Chr3	13702812	T	C	0.3974	0.429	0.0514403	0.513311	BOB03G037610	Belongs to the CTL (choline transporter-like) family
Chr3	13723296	C	G	0.383982	0.4465	0.0761317	0.505811	BOB03G037660	26S proteasome non-ATPase regulatory subunit 4 homolog
Chr3	13724419	G	A	0.384006	0.4506	0.0699588	0.50586	BOB03G037660	26S proteasome non-ATPase regulatory subunit 4 homolog
Chr3	13727190	G	A	0.374478	0.427	0.0545267	0.496929	BOB03G037680	RNA polymerase II transcription regulator recruiting activity
Chr3	13742196	C	G	0.39151	0.464	0.0462963	0.511021	BOB03G037710	Domain Homologous to E6-AP Carboxyl Terminus with
Chr3	13743064	G	A	0.38622	0.4414	0.0493827	0.506349	BOB03G037710	Domain Homologous to E6-AP Carboxyl Terminus with
Chr3	13745190	G	A	0.387009	0.427	0.0576132	0.505993	BOB03G037710	Domain Homologous to E6-AP Carboxyl Terminus with
Chr3	13755114	G	A	0.391809	0.4177	0.0493827	0.507919	BOB03G037740	NA
Chr3	13796579	A	G	0.385848	0.4064	0.0740741	0.503732	BOB03G037820	Niemann-Pick C1 N terminus
Chr3	13801268	C	A	0.384158	0.3971	0.0648148	0.50046	BOB03G037820	Niemann-Pick C1 N terminus
Chr3	13954127	T	A	0.375005	0.3632	0.063786	0.486585	BOB03G038210	domain-containing protein
Chr3	13980092	C	G	0.376176	0.4012	0.0781893	0.496315	BOB03G038280	BEST Arabidopsis thaliana protein match is
Chr3	13994912	A	G	0.387117	0.4547	0.0761317	0.50811	BOB03G038330	Transducin WD40 repeat-like superfamily protein
Chr3	13995077	C	A	0.382405	0.4403	0.0843621	0.504659	BOB03G038330	Transducin WD40 repeat-like superfamily protein
Chr3	13995413	C	T	0.379613	0.4156	0.0874486	0.501113	BOB03G038330	Transducin WD40 repeat-like superfamily protein
Chr3	14068283	G	T	0.388959	0.3971	0.0679012	0.50424	BOB03G038520	YT521-B-like domain
Chr3	14389518	A	T	0.377312	0.4156	0.0421811	0.496596	BOB03G039300	Elongation factor
Chr3	14660939	A	T	0.370841	0.358	0.0514403	0.480501	BOB03G040100	Belongs to the glycosyl hydrolase 47 family
Chr3	15082917	C	T	0.406413	0.4311	0.0565844	0.520146	BOB03G041090	U-box domain-containing protein
Chr3	15243149	C	T	0.385161	0.4331	0.0833333	0.50619	BOB03G041550	Protein of unknown function (DUF688)
Chr3	15250762	A	G	0.373426	0.4218	0.0771605	0.496862	BOB03G041560	nucleic acid binding
Chr3	15496404	G	A	0.398806	0.3971	0.0823045	0.512498	BOB03G042290	multicellular organism development
Chr3	15967929	G	C	0.385634	0.4671	0.0565844	0.507122	BOB03G043530	RNA helicase
Chr3	15984710	A	C	0.373021	0.3498	0.0596708	0.481098	BOB03G043560	Interferon-related developmental regulator
Chr3	15990970	G	A	0.385538	0.4486	0.0761317	0.506933	BOB03G043570	Domain that may be involved in binding ubiquitin-conjugating enzymes (UBCs)
Chr3	16086430	T	A	0.386837	0.4208	0.0658436	0.505658	BOB03G043830	helix loop helix domain
Chr3	16098433	G	T	0.399433	0.393	0.0761317	0.511975	BOB03G043840	contain most of the conserved domains of hsU2AF35, including the psiRRM, one RS domain, two zinc fingers, and the two regions for interacting with U2AF large subunit. Both proteins lack the stretch of glycines present in human U2AF35. The sequences are overall 83 identical, and each Arabidopsis homolog shows approximately 70 similarity to hsU2AF35. U2AF(35) homologs were also identified from maiz…
Chr3	40774374	T	C	0.41541	0.4455	0.0555556	0.527257	BOB03G108170	Zinc finger (C3HC4-type RING finger) family protein
Chr3	41395432	A	G	0.379183	0.4126	0.0833333	0.500266	BOB03G109860	Flavoprotein (FP) subunit of succinate dehydrogenase (SDH) that is involved in complex II of the mitochondrial electron transport chain and is responsible for transferring electrons from succinate to ubiquinone (coenzyme Q)
Chr3	41411151	T	A	0.383808	0.429	0.0997942	0.505467	BOB03G109910	Belongs to the small GTPase superfamily. Arf family
Chr3	41524091	T	C	0.386834	0.4311	0.095679	0.507553	BOB03G110160	Component of the anaphase promoting complex cyclosome (APC C), a cell cycle-regulated E3 ubiquitin-protein ligase complex that controls progression through mitosis and the G1 phase of the cell cycle
Chr3	41524332	T	C	0.38045	0.4187	0.106996	0.502767	BOB03G110160	Component of the anaphase promoting complex cyclosome (APC C), a cell cycle-regulated E3 ubiquitin-protein ligase complex that controls progression through mitosis and the G1 phase of the cell cycle
Chr3	41555018	G	T	0.411439	0.4465	0.0699588	0.524664	BOB03G110220	Belongs to the terpene cyclase mutase family
Chr3	41562066	C	G	0.382464	0.3529	0.0668724	0.49021	BOB03G110260	Belongs to the AAA ATPase family
Chr3	41658150	G	A	0.379228	0.4105	0.0884774	0.500356	BOB03G110480	Belongs to the STXBP unc-18 SEC1 family
Chr3	41878364	A	G	0.411393	0.4259	0.0473251	0.522932	BOB03G111110	retrograde transport, endosome to Golgi
Chr3	43826140	T	C	0.386039	0.4002	0.063786	0.502252	BOB03G116600	zinc finger
Chr3	44232565	C	A	0.379503	0.4599	0.0576132	0.502881	BOB03G117860	alanine glyoxylate aminotransferase
Chr3	44253151	C	T	0.385121	0.394	0.0627572	0.500484	BOB03G117950	PLATZ transcription factor
Chr3	44253554	T	C	0.392073	0.4095	0.0709877	0.50843	BOB03G117950	PLATZ transcription factor
Chr3	44259318	A	C	0.389994	0.428	0.0545267	0.508068	BOB03G117960	Ubiquitin associated domain
Chr3	44650153	G	T	0.391393	0.4465	0.0699588	0.510794	BOB03G118940	Non-repetitive/WGA-negative nucleoporin C-terminal
Chr3	44655990	C	A	0.383547	0.4208	0.0606996	0.503026	BOB03G118950	The light-harvesting complex (LHC) functions as a light receptor, it captures and delivers excitation energy to photosystems with which it is closely associated
Chr3	44656263	T	C	0.384368	0.4105	0.0668724	0.50273	BOB03G118950	The light-harvesting complex (LHC) functions as a light receptor, it captures and delivers excitation energy to photosystems with which it is closely associated
Chr3	44678249	T	A	0.383492	0.4331	0.0771605	0.504845	BOB03G119020	DNA binding domain
Chr3	44695823	G	A	0.3824	0.3632	0.0596708	0.491786	BOB03G119060	Pentatricopeptide repeat-containing protein
Chr3	44697932	G	A	0.424295	0.4033	0.0462963	0.529946	BOB03G119070	Cytochrome b-561 / ferric reductase transmembrane domain.
Chr3	45182424	C	T	0.37956	0.4537	0.0771605	0.502996	BOB03G120480	Belongs to the formin-like family
Chr3	48324817	C	A	0.380647	0.4496	0.0534979	0.503156	BOB03G129210	cobra-like protein 10
Chr3	48326011	G	C	0.384936	0.4475	0.0452675	0.505747	BOB03G129210	cobra-like protein 10
Chr3	48346804	A	C	0.389352	0.4064	0.0555556	0.504996	BOB03G129250	Serine threonine-protein kinase
Chr3	48687371	G	A	0.38408	0.4239	0.0668724	0.504067	BOB03G130060	NA
Chr3	49797239	C	T	0.392989	0.4599	0.0555556	0.512041	BOB03G133490	phosphopantothenoylcysteine decarboxylase
Chr3	49802026	T	G	0.39585	0.4537	0.0596708	0.513921	BOB03G133510	Homeodomain
Chr3	49819634	C	T	0.401678	0.465	0.0493827	0.518002	BOB03G133530	ADP-ribosylation factor GTPase-activating protein
Chr3	49820673	A	C	0.389868	0.4228	0.0617284	0.507822	BOB03G133540	Translocon at the outer membrane of chloroplasts 64-III
Chr3	49826127	A	C	0.395113	0.4311	0.0668724	0.512491	BOB03G133550	NA
Chr3	49893779	A	T	0.385226	0.4424	0.0679012	0.506319	BOB03G133780	F-box LRR-repeat kelch-repeat protein At1g11620
Chr3	50857045	T	C	0.383294	0.4136	0.109053	0.504456	BOB03G136660	The coatomer is a cytosolic protein complex that binds to dilysine motifs and reversibly associates with Golgi non- clathrin-coated vesicles, which further mediate biosynthetic protein transport from the ER, via the Golgi up to the trans Golgi network. Coatomer complex is required for budding from Golgi membranes, and is essential for the retrograde Golgi-to-ER transport of dilysine-tagged protei…
Chr3	50860403	A	G	0.424775	0.4383	0.0648148	0.533807	BOB03G136660	The coatomer is a cytosolic protein complex that binds to dilysine motifs and reversibly associates with Golgi non- clathrin-coated vesicles, which further mediate biosynthetic protein transport from the ER, via the Golgi up to the trans Golgi network. Coatomer complex is required for budding from Golgi membranes, and is essential for the retrograde Golgi-to-ER transport of dilysine-tagged protei…
Chr3	51040239	A	C	0.379666	0.4115	0.063786	0.49927	BOB03G137160	Cytochrome c oxidase subunit 5b-1
Chr3	51079442	C	T	0.393439	0.4331	0.0565844	0.511072	BOB03G137280	NAC domain-containing protein
Chr3	51112393	T	A	0.381241	0.428	0.0648148	0.502361	BOB03G137400	(NAC) domain-containing protein
Chr3	52177826	A	C	0.374917	0.4043	0.0524691	0.493851	BOB03G140260	YT521-B-like domain
Chr3	52286359	C	G	0.382476	0.4444	0.0812757	0.5048	BOB03G140500	Plant protein of unknown function (DUF868)
Chr3	52352056	C	A	0.379194	0.393	0.0925926	0.498347	BOB03G140670	domain-containing protein
Chr3	52355403	A	T	0.383954	0.4064	0.0987654	0.503821	BOB03G140680	START domain
Chr3	52435674	T	C	0.382167	0.3796	0.0555556	0.494835	BOB03G140860	Transcription factor
Chr3	52448686	C	T	0.378804	0.3693	0.0576132	0.490226	BOB03G140880	Belongs to the iron ascorbate-dependent oxidoreductase family
Chr3	53697731	G	T	0.385767	0.428	0.0627572	0.505461	BOB03G144290	DNA-templated transcriptional preinitiation complex assembly
Chr3	54064441	G	T	0.391465	0.4434	0.0823045	0.510934	BOB03G145350	Tudor PWWP MBT superfamily protein
Chr3	55371356	C	A	0.383826	0.4331	0.0925926	0.505504	BOB03G148620	Ankyrin repeats (many copies)
Chr3	55375338	T	C	0.391297	0.4074	0.0606996	0.506933	BOB03G148640	Required for endonucleolytic cleavage during polyadenylation-dependent pre-mRNA 3'-end formation
Chr3	55604349	T	C	0.384508	0.3807	0.0812757	0.499307	BOB03G149330	Diphthamide synthase
Chr3	55613455	A	G	0.384018	0.4588	0.0545267	0.505882	BOB03G149350	Ubiquitin-binding WIYLD domain
Chr3	55613656	T	C	0.38847	0.4496	0.0679012	0.508851	BOB03G149350	Ubiquitin-binding WIYLD domain
Chr3	55639847	C	T	0.389468	0.4352	0.0699588	0.50891	BOB03G149440	Belongs to the 'GDSL' lipolytic enzyme family
Chr3	55709429	T	C	0.381032	0.4578	0.0617284	0.503918	BOB03G149660	polyribonucleotide nucleotidyltransferase
Chr3	55711752	A	C	0.386997	0.4455	0.0781893	0.507873	BOB03G149660	polyribonucleotide nucleotidyltransferase
Chr3	55991019	G	A	0.37947	0.465	0.0442387	0.502816	BOB03G150400	Component of the cytosolic iron-sulfur (Fe-S) protein assembly (CIA) machinery. Required for the maturation of extramitochondrial Fe-S proteins. Part of an electron transfer chain functioning in an early step of cytosolic Fe-S biogenesis. Transfers electrons from NADPH to the Fe-S cluster of the anamorsin DRE2 homolog
Chr3	56002587	T	C	0.376444	0.466	0.0473251	0.500836	BOB03G150420	fucose metabolic process
Chr3	56488454	G	A	0.406499	0.4136	0.0576132	0.518631	BOB03G151700	Plant phosphoribosyltransferase C-terminal
Chr3	56496610	A	G	0.388611	0.4753	0.0380658	0.509129	BOB03G151720	belongs to the protein kinase superfamily
Chr3	56507363	T	A	0.3699	0.3786	0.0617284	0.486029	BOB03G151740	Putative S-adenosyl-L-methionine-dependent methyltransferase
Chr3	56525998	C	A	0.380257	0.4105	0.0771605	0.500428	BOB03G151790	mitogen-activated protein kinase
Chr3	56529815	A	T	0.376135	0.3909	0.0740741	0.494301	BOB03G151800	CAAX prenyl protease 1 homolog
Chr3	57058095	G	C	0.377872	0.3868	0.063786	0.493889	BOB03G153070	Protein kinase domain
Chr3	57122287	C	T	0.386583	0.3879	0.0740741	0.50148	BOB03G153260	DNAJ heat shock N-terminal domain-containing protein
Chr3	57123028	G	T	0.382771	0.4033	0.0802469	0.501509	BOB03G153260	DNAJ heat shock N-terminal domain-containing protein
Chr3	57278581	A	C	0.382815	0.3858	0.0504115	0.496068	BOB03G153680	Lectin-domain containing receptor kinase
Chr3	59701072	C	T	0.400109	0.4424	0.0740741	0.516751	BOB03G159820	lectin protein kinase family
Chr3	59744702	C	T	0.379441	0.3868	0.063786	0.495057	BOB03G159920	Receptor homology region, transmembrane domain- and RING domain-containing protein
Chr3	60309766	A	G	0.407184	0.4053	0.0596708	0.518271	BOB03G161400	1-aminocyclopropane-1-carboxylate synthase
Chr3	60386375	T	A	0.388268	0.4105	0.0843621	0.506571	BOB03G161550	U3 small nucleolar RNA-associated protein
Chr3	60588615	A	T	0.390069	0.4547	0.0709877	0.510086	BOB03G162030	Pentacotripeptide-repeat region of PRORP
Chr3	61612954	A	C	0.385632	0.466	0.0576132	0.507119	BOB03G164360	Belongs to the glycosyl hydrolase 17 family
Chr3	61617149	T	G	0.382136	0.43	0.090535	0.504126	BOB03G164370	BEST Arabidopsis thaliana protein match is transducin family protein WD-40 repeat family protein (TAIR AT3G33530.1)
Chr3	61905724	C	G	0.412835	0.4486	0.0699588	0.525657	BOB03G165020	glycine-rich cell wall structural protein
Chr3	62149417	G	A	0.38743	0.4043	0.0792181	0.504942	BOB03G165640	CRS1_YhbY
Chr3	62292410	C	G	0.386451	0.3745	0.0462963	0.49598	BOB03G165950	NA
Chr3	62294588	C	T	0.388444	0.4434	0.0781893	0.5088	BOB03G165960	belongs to the protein kinase superfamily
Chr3	62338343	A	T	0.383823	0.4126	0.0833333	0.503565	BOB03G166040	Homeobox domain
Chr3	62818252	A	G	0.375917	0.3632	0.0576132	0.486534	BOB03G167220	Acts in the modification of cell walls via demethylesterification of cell wall pectin
Chr3	62838029	C	T	0.372584	0.3724	0.0524691	0.485595	BOB03G167290	NA
Chr3	62879243	C	G	0.375108	0.3745	0.0576132	0.488586	BOB03G167380	Probably inactive receptor-like protein kinase At2g46850
Chr3	65038773	T	C	0.372562	0.4012	0.0709877	0.49315	BOB03G172940	Translation initiation factor IF-2, N-terminal region
Chr3	65592516	T	A	0.385306	0.4465	0.063786	0.506476	BOB03G174400	ABC1 family
Chr3	65600333	G	C	0.390919	0.4136	0.0699588	0.508019	BOB03G174420	BEST Arabidopsis thaliana protein match is proline-rich family protein (TAIR AT3G09000.1)
Chr3	65601020	T	C	0.384792	0.4311	0.0730453	0.505464	BOB03G174420	BEST Arabidopsis thaliana protein match is proline-rich family protein (TAIR AT3G09000.1)
Chr3	65601179	A	G	0.38622	0.428	0.0761317	0.506349	BOB03G174420	BEST Arabidopsis thaliana protein match is proline-rich family protein (TAIR AT3G09000.1)
Chr3	65606145	T	G	0.397382	0.4599	0.0627572	0.515073	BOB03G174440	DNA-dependent RNA polymerase catalyzes the transcription of DNA into RNA using the four ribonucleoside triphosphates as substrates
Chr3	65620534	C	G	0.383878	0.4455	0.0709877	0.505607	BOB03G174450	Clathrin is the major protein of the polyhedral coat of coated pits and vesicles
Chr3	65624608	T	C	0.385066	0.4342	0.0771605	0.506004	BOB03G174460	Auxin transporter-like protein
Chr3	65813295	C	T	0.384792	0.4383	0.058642	0.505464	BOB03G174960	atexpa4, atexp4, athexp alpha 1.6 atexpa4 (arabidopsis thaliana expansin a4)
Chr3	66264027	A	T	0.385972	0.4012	0.0606996	0.502123	BOB03G176130	NA
Chr3	67049023	A	G	0.395051	0.3961	0.0709877	0.50881	BOB03G177980	Mitochondrial import inner membrane translocase subunit
Chr3	68501364	C	A	0.383482	0.4084	0.0555556	0.501008	BOB03G181590	BEST Arabidopsis thaliana protein match is Kinase-related
Chr3	68725855	T	A	0.379706	0.3549	0.0658436	0.488448	BOB03G182170	heterogeneous nuclear ribonucleoprotein
Chr3	68792165	C	A	0.376209	0.392	0.0730453	0.494445	BOB03G182350	Contains the following InterPro domains Pectin lyase fold virulence factor (InterPro IPR011050), Pectin lyase fold (InterPro IPR012334), Glycoside hydrolase, family 28 (InterPro IPR000743)
Chr3	68832598	A	T	0.378835	0.3652	0.0514403	0.488535	BOB03G182440	carbohydrate transmembrane transporter inorganic phosphate transmembrane transporter phosphate transmembrane transporter sugar hydrogen symporter
Chr3	68842449	G	A	0.380753	0.4084	0.0617284	0.499477	BOB03G182490	Serine threonine-protein kinase
Chr3	68842794	G	A	0.390722	0.4136	0.0658436	0.507638	BOB03G182490	Serine threonine-protein kinase
Chr3	68933635	G	T	0.368087	0.3735	0.0534979	0.482542	BOB03G182730	ATP synthase
Chr3	68933893	C	T	0.365265	0.3755	0.0534979	0.480895	BOB03G182730	ATP synthase
Chr3	68942102	A	T	0.387471	0.4239	0.0761317	0.506895	BOB03G182740	receptor-like protein 12
Chr3	69084106	T	A	0.382543	0.4414	0.031893	0.502978	BOB03G183020	Glutamate-gated receptor that probably acts as non- selective cation channel
Chr3	69085828	G	T	0.379572	0.4681	0.0504115	0.503019	BOB03G183020	Glutamate-gated receptor that probably acts as non- selective cation channel
Chr3	69085954	A	C	0.38028	0.4496	0.0390947	0.50243	BOB03G183020	Glutamate-gated receptor that probably acts as non- selective cation channel
Chr3	69109524	C	T	0.386803	0.3992	0.0545267	0.501904	BOB03G183090	Plastocyanin-like domain
Chr3	69131092	G	A	0.398822	0.4527	0.0771605	0.516054	BOB03G183140	NA
Chr3	72409478	T	C	0.389879	0.4455	0.0699588	0.509714	BOB03G191130	zinc finger
Chr3	72440159	A	T	0.385287	0.4393	0.0771605	0.506438	BOB03G191200	beta-galactosidase
Chr3	72588939	A	T	0.385324	0.4465	0.0648148	0.506512	BOB03G191550	Modified RING finger domain
Chr3	72601542	A	G	0.377869	0.4126	0.0576132	0.497686	BOB03G191570	glyoxalase I family protein
Chr3	72611157	T	A	0.382366	0.4126	0.0545267	0.50072	BOB03G191580	May act as a component of the auxin efflux carrier
Chr3	72735843	G	A	0.382088	0.4393	0.0699588	0.504033	BOB03G191940	PB1 domain
Chr3	73929470	T	C	0.383158	0.4033	0.0606996	0.500381	BOB03G194990	Coiled-coil domain-containing protein
Chr3	74243542	A	G	0.380893	0.4434	0.0792181	0.503645	BOB03G195860	Belongs to the TRAFAC class myosin-kinesin ATPase superfamily. Myosin family
Chr3	74360690	A	G	0.390052	0.4568	0.063786	0.510053	BOB03G196060	RNA polymerase II transcription
Chr3	74383741	G	A	0.407214	0.4414	0.0751029	0.521674	BOB03G196150	Nudix hydrolase
Chr3	74394682	C	A	0.401546	0.4434	0.0720165	0.517748	BOB03G196180	receptor-like protein kinase At5g20050
Chr3	74410618	A	G	0.379568	0.3909	0.0781893	0.497172	BOB03G196240	26S protease regulatory subunit 8 homolog
Chr3	74467971	G	A	0.392145	0.4342	0.0606996	0.510398	BOB03G196400	Transcription factor
Chr3	74507945	C	A	0.38239	0.4434	0.0771605	0.504628	BOB03G196500	ion channel
Chr3	74532095	A	G	0.384126	0.4578	0.0720165	0.506097	BOB03G196560	RNA binding motif
Chr3	74591388	T	A	0.418963	0.4352	0.0483539	0.529148	BOB03G196710	DUF3700
Chr3	75199230	T	C	0.384978	0.3879	0.0534979	0.49841	BOB03G198140	tetratricopeptide repeat
Chr3	75204662	T	C	0.386189	0.4228	0.0853909	0.506287	BOB03G198150	NAC domain containing protein
Chr3	75221240	C	T	0.382501	0.4414	0.0895062	0.504848	BOB03G198190	NA
Chr3	76026697	A	T	0.398607	0.4465	0.0617284	0.51564	BOB03G200490	Lipase (class 3)
Chr3	76173975	G	A	0.378573	0.4403	0.0524691	0.501038	BOB03G200950	SWIB/MDM2 domain
Chr3	76175262	G	C	0.388442	0.4321	0.0452675	0.50691	BOB03G200950	SWIB/MDM2 domain
Chr3	76196910	C	A	0.392695	0.4383	0.0751029	0.511469	BOB03G201030	NA
Chr3	76225356	T	C	0.382601	0.4064	0.0709877	0.501178	BOB03G201100	Aspartokinase
Chr3	76228627	A	G	0.385557	0.3971	0.0627572	0.501323	BOB03G201110	Belongs to the mitochondrial carrier (TC 2.A.29) family
Chr3	76229220	T	G	0.384016	0.392	0.0730453	0.500187	BOB03G201110	Belongs to the mitochondrial carrier (TC 2.A.29) family
Chr3	76234842	C	T	0.434698	0.4012	0.0720165	0.538974	BOB03G201130	BEST Arabidopsis thaliana protein match is
Chr3	76267641	C	T	0.382629	0.4609	0.0709877	0.505102	BOB03G201220	glycosyl hydrolase family 38 protein
Chr3	76718118	A	G	0.410038	0.4475	0.0658436	0.523673	BOB03G202100	Geranylgeranyl transferase
Chr3	76722945	C	T	0.384136	0.4568	0.0792181	0.506115	BOB03G202120	ATP binding calcium ion binding calmodulin-dependent protein kinase kinase protein kinase protein serine threonine kinase
Chr3	76732274	T	C	0.385312	0.4177	0.0720165	0.50457	BOB03G202150	ion channel
Chr3	77726989	G	A	0.38028	0.4372	0.063786	0.50243	BOB03G204390	Topless-related protein
Chr3	77912539	G	T	0.386931	0.4568	0.0504115	0.507743	BOB03G204870	Plant intracellular ras-group-related LRR protein
Chr3	77913186	T	A	0.385505	0.4527	0.0648148	0.506868	BOB03G204870	Plant intracellular ras-group-related LRR protein
Chr3	78013754	G	C	0.438377	0.4321	0.0421811	0.542894	BOB03G205110	NA
Chr3	78056142	T	C	0.407156	0.3909	0.0452675	0.515004	BOB03G205220	Belongs to the Glu Leu Phe Val dehydrogenases family
Chr3	78056433	C	T	0.381085	0.3889	0.0606996	0.49638	BOB03G205220	Belongs to the Glu Leu Phe Val dehydrogenases family
Chr3	78065567	C	A	0.385176	0.4126	0.0792181	0.504305	BOB03G205240	respiratory burst oxidase homolog protein
Chr3	78192953	T	G	0.387263	0.393	0.0524691	0.50099	BOB03G205530	Belongs to the peptidase A1 family
Chr3	78246711	G	A	0.39065	0.43	0.06893	0.509344	BOB03G205710	strubbelig-receptor family
Chr3	78472254	C	T	0.3821	0.4259	0.0524691	0.50211	BOB03G206240	U3 small nucleolar RNA-associated protein 15 homolog
Chr3	78474510	T	C	0.386453	0.4414	0.0576132	0.506806	BOB03G206260	Belongs to the cyclin family
Chr3	78474822	A	G	0.388559	0.4609	0.0545267	0.509027	BOB03G206260	Belongs to the cyclin family
Chr3	78719553	G	A	0.38968	0.4414	0.0668724	0.509324	BOB03G206900	The coatomer is a cytosolic protein complex that binds to dilysine motifs and reversibly associates with Golgi non- clathrin-coated vesicles, which further mediate biosynthetic protein transport from the ER, via the Golgi up to the trans Golgi network. Coatomer complex is required for budding from Golgi membranes, and is essential for the retrograde Golgi-to-ER transport of dilysine-tagged protei…
Chr3	78854418	T	A	0.387882	0.4321	0.0730453	0.5077	BOB03G207210	Protein of unknown function (DUF455)
Chr3	78894165	A	G	0.385608	0.4475	0.0874486	0.507071	BOB03G207320	Kelch motif
Chr3	78904206	G	A	0.391524	0.4403	0.095679	0.511049	BOB03G207360	zinc finger
Chr3	78906906	T	G	0.381041	0.4465	0.0853909	0.503937	BOB03G207370	carboxyl
Chr4	268828	A	T	0.383942	0.3776	0.0802469	0.498222	BOB04G000450	transcription factor
Chr4	843614	A	G	0.373373	0.3868	0.0668724	0.490845	BOB04G001580	cytochrome P450
Chr4	844073	C	T	0.37375	0.3817	0.0627572	0.489682	BOB04G001580	cytochrome P450
Chr4	1071738	T	A	0.382223	0.4372	0.0802469	0.504299	BOB04G002080	homeobox-leucine zipper protein
Chr4	1072728	G	A	0.382244	0.4444	0.0668724	0.50434	BOB04G002080	homeobox-leucine zipper protein
Chr4	1305846	T	A	0.375084	0.4259	0.0709877	0.498129	BOB04G002640	Methylenetetrahydrofolate reductase
Chr4	1552240	G	A	0.379091	0.4146	0.0771605	0.500084	BOB04G003290	protein FAR1-RELATED SEQUENCE
Chr4	1584157	C	A	0.377481	0.4136	0.0781893	0.49888	BOB04G003380	NA
Chr4	3051482	A	T	0.383941	0.4496	0.0668724	0.50573	BOB04G006990	DNA replication complex GINS protein PSF3-like
Chr4	3070750	A	G	0.385414	0.3807	0.0936214	0.501047	BOB04G007070	Nematode resistance protein-like
Chr4	3165859	C	A	0.379939	0.3529	0.0720165	0.488884	BOB04G007270	P5CS plays a key role in proline biosynthesis, leading to osmoregulation in plants
Chr4	3169322	T	C	0.382584	0.4146	0.0864198	0.503059	BOB04G007270	P5CS plays a key role in proline biosynthesis, leading to osmoregulation in plants
Chr4	3281366	A	G	0.369055	0.3632	0.0679012	0.482534	BOB04G007470	Putative zinc-finger domain
Chr4	3543739	G	C	0.388041	0.4321	0.0792181	0.508011	BOB04G008060	AMMECR1
Chr4	3545768	C	T	0.377996	0.4537	0.0730453	0.501898	BOB04G008070	pect1 pect1 (phosphorylethanolamine cytidylyltransferase 1)
Chr4	4835659	A	G	0.37792	0.4547	0.063786	0.501746	BOB04G011040	mTERF
Chr4	5524409	G	A	0.396526	0.427	0.0730453	0.513415	BOB04G012890	fatty acid alpha-hydroxylase activity
Chr4	7253813	T	C	0.376007	0.4228	0.0617284	0.497953	BOB04G017310	Poly (ADP-ribose) glycohydrolase (PARG)
Chr4	9164238	C	T	0.386778	0.4403	0.0740741	0.507443	BOB04G022360	Tubulin is the major constituent of microtubules. It binds two moles of GTP, one at an exchangeable site on the beta chain and one at a non-exchangeable site on the alpha chain
Chr4	9165048	C	T	0.389016	0.43	0.0648148	0.508029	BOB04G022360	Tubulin is the major constituent of microtubules. It binds two moles of GTP, one at an exchangeable site on the beta chain and one at a non-exchangeable site on the alpha chain
Chr4	12372873	T	G	0.392897	0.4486	0.0679012	0.511861	BOB04G030780	LRR receptor-like serine threonine-protein kinase
Chr4	12438415	A	G	0.397069	0.3807	0.0874486	0.509197	BOB04G030990	translation initiation factor binding
Chr4	12438760	T	A	0.385485	0.3858	0.0843621	0.501185	BOB04G030990	translation initiation factor binding
Chr4	12439290	C	T	0.383149	0.3909	0.11214	0.502247	BOB04G030990	translation initiation factor binding
Chr4	12497162	G	A	0.386657	0.4095	0.0843621	0.505307	BOB04G031110	Belongs to the small GTPase superfamily. Arf family
Chr4	12507631	C	T	0.391014	0.429	0.0843621	0.510053	BOB04G031140	F-box protein
Chr4	12575872	T	C	0.414149	0.4352	0.0864198	0.526501	BOB04G031350	B3 domain-containing protein
Chr4	14063327	C	G	0.388603	0.4496	0.0853909	0.509112	BOB04G035440	Histone-lysine N-methyltransferase
Chr4	16030371	T	C	0.396878	0.43	0.0802469	0.514096	BOB04G040430	CRS1_YhbY
Chr4	16903366	G	A	0.386778	0.4352	0.0843621	0.507443	BOB04G043010	serine threonine-protein kinase
Chr4	17479013	C	T	0.4871	0.3837	0.0617284	0.577497	BOB04G044560	Belongs to the mitochondrial carrier (TC 2.A.29) family
Chr4	17555181	T	G	0.460722	0.3981	0.0545267	0.557682	BOB04G044720	F-box LRR-repeat kelch-repeat protein At1g11620
Chr4	18633857	C	T	0.410413	0.3827	0.0668724	0.517917	BOB04G047710	RNA recognition motif
Chr4	18634118	C	T	0.384429	0.3837	0.0740741	0.499155	BOB04G047710	RNA recognition motif
Chr4	18656082	G	A	0.386582	0.4383	0.06893	0.507057	BOB04G047760	ribosome biogenesis protein RLP24
Chr4	19086111	C	A	0.368613	0.3642	0.0617284	0.481691	BOB04G048890	WAT1-related protein
Chr4	19165583	A	C	0.381351	0.3817	0.0596708	0.49507	BOB04G049140	U-box domain-containing protein
Chr4	19168182	G	A	0.396754	0.4352	0.0648148	0.513856	BOB04G049150	Protein of unknown function, DUF547
Chr4	19173480	G	C	0.393036	0.3683	0.063786	0.501611	BOB04G049180	NA
Chr4	19231871	A	G	0.389093	0.4002	0.063786	0.504496	BOB04G049430	Agamous-like MADS-box protein AGL93
Chr4	19460737	C	A	0.384634	0.4331	0.063786	0.505155	BOB04G050110	Glycosyl hydrolases family 28
Chr4	19544595	G	A	0.38712	0.4527	0.0812757	0.508116	BOB04G050370	ATP-dependent RNA helicase
Chr4	19572121	A	G	0.38352	0.3858	0.058642	0.497415	BOB04G050430	Glycogen recognition site of AMP-activated protein kinase
Chr4	19873588	G	A	0.369514	0.3837	0.0473251	0.485283	BOB04G051220	F-box family
Chr4	22561106	G	A	0.373418	0.3673	0.0709877	0.487187	BOB04G058400	Belongs to the RNase T2 family
Chr4	22824036	T	C	0.382122	0.3992	0.0771605	0.500246	BOB04G059320	DNA binding
Chr4	22824443	C	A	0.384123	0.4568	0.0730453	0.50609	BOB04G059320	DNA binding
Chr4	22886000	A	C	0.386629	0.4496	0.0483539	0.50715	BOB04G059520	chlorophyll(ide) b reductase NYC1, chloroplastic
Chr4	22939712	C	T	0.382544	0.4558	0.0648148	0.504933	BOB04G059700	Cysteine-rich receptor-like protein kinase
Chr4	24248621	G	A	0.371409	0.3745	0.0524691	0.485186	BOB04G062970	Histidine kinase
Chr4	24259237	A	G	0.377946	0.3817	0.0565844	0.492187	BOB04G062980	Functions as actin-binding component of the Arp2 3 complex which is involved in regulation of actin polymerization and together with an activating nucleation-promoting factor (NPF) mediates the formation of branched actin networks. Seems to contact the mother actin filament
Chr4	24300623	A	G	0.413391	0.3981	0.0843621	0.523464	BOB04G063040	Histidyl-tRNA synthetase 1
Chr4	34707456	G	C	0.389506	0.4228	0.0534979	0.507119	BOB04G092680	NA
Chr4	41877247	T	C	0.395593	0.3796	0.0524691	0.50474	BOB04G114650	NA
Chr4	45880335	G	A	0.385066	0.429	0.0874486	0.506004	BOB04G127300	Domain of unknown function (DUF4339)
Chr4	46201622	T	C	0.385988	0.4198	0.0853909	0.505893	BOB04G128210	OTU domain-containing protein 5-like
Chr4	46202025	T	G	0.386282	0.4198	0.0946502	0.506469	BOB04G128210	OTU domain-containing protein 5-like
Chr4	46392356	A	G	0.413679	0.4167	0.0534979	0.524003	BOB04G128740	Belongs to the glycosyl hydrolase 17 family
Chr4	46458761	G	T	0.382223	0.4414	0.0720165	0.504299	BOB04G128930	Belongs to the AAA ATPase family
Chr4	46459372	C	A	0.394172	0.4342	0.0833333	0.512494	BOB04G128930	Belongs to the AAA ATPase family
Chr4	50225491	G	A	0.384135	0.4599	0.0720165	0.506114	BOB04G139340	transcription repressor
Chr4	50254797	A	G	0.390091	0.4609	0.0679012	0.510129	BOB04G139450	High-level expression of sugar-inducible gene 2
Chr4	50307060	G	A	0.383382	0.4403	0.058642	0.504629	BOB04G139580	NA
Chr4	50397585	A	G	0.391407	0.4414	0.0812757	0.51082	BOB04G139820	nucleosome assembly
Chr4	50574964	C	T	0.386629	0.4352	0.0771605	0.50715	BOB04G140390	synthase
Chr4	50577562	A	G	0.390081	0.4527	0.0781893	0.51011	BOB04G140400	Zein-binding
Chr4	51150898	C	T	0.382112	0.4259	0.0977366	0.50408	BOB04G142010	DALR_2
Chr4	51248618	C	T	0.381784	0.3776	0.0555556	0.494107	BOB04G142280	S-locus lectin protein kinase family protein
Chr4	51683478	A	G	0.378281	0.3889	0.0648148	0.49468	BOB04G143630	MAP kinase kinase kinase activity
Chr4	52098211	A	T	0.38632	0.4095	0.0771605	0.504651	BOB04G144690	synthase
Chr4	52101354	C	T	0.389479	0.3951	0.0802469	0.505239	BOB04G144690	synthase
Chr4	52102326	G	A	0.376146	0.4136	0.0833333	0.498228	BOB04G144690	synthase
Chr4	52106536	T	G	0.377711	0.3868	0.0823045	0.495459	BOB04G144690	synthase
Chr4	52784024	T	C	0.372796	0.3714	0.0565844	0.485999	BOB04G146360	Belongs to the group II decarboxylase family
Chr4	53658321	A	C	0.380772	0.4455	0.0679012	0.503404	BOB04G148920	Aux IAA proteins are short-lived transcriptional factors that function as repressors of early auxin response genes at low auxin concentrations
Chr4	53826458	G	A	0.395425	0.357	0.0658436	0.501192	BOB04G149340	Myb/SANT-like DNA-binding domain
Chr4	56590218	G	T	0.395693	0.4424	0.0699588	0.513616	BOB04G157060	phosphatidylinositol-4,5-bisphosphate 5-phosphatase activity
Chr4	56865118	G	A	0.401617	0.4414	0.0833333	0.517885	BOB04G157860	Catalyzes the formation of S-adenosylmethionine from methionine and ATP
Chr4	57022777	C	T	0.380769	0.3879	0.0792181	0.497621	BOB04G158360	Phenylalanine ammonia-lyase
Chr4	57083703	C	T	0.423239	0.3868	0.0843621	0.529473	BOB04G158510	NA
Chr4	57089822	T	G	0.401195	0.3961	0.102881	0.515328	BOB04G158540	Cytokinin-activating enzyme working in the direct activation pathway. Phosphoribohydrolase that converts inactive cytokinin nucleotides to the biologically active free-base forms
Chr4	57137883	G	C	0.389331	0.43	0.0751029	0.508643	BOB04G158700	Belongs to the ABC transporter superfamily. ABCG family. PDR (TC 3.A.1.205) subfamily
Chr4	57141694	C	T	0.385041	0.4321	0.0802469	0.505955	BOB04G158710	Domain in Tre-2, BUB2p, and Cdc16p. Probable Rab-GAPs.
Chr4	57141965	T	C	0.380732	0.4331	0.090535	0.503326	BOB04G158710	Domain in Tre-2, BUB2p, and Cdc16p. Probable Rab-GAPs.
Chr4	57297937	T	G	0.395212	0.4167	0.0596708	0.510883	BOB04G159100	Sodium/hydrogen exchanger family
Chr4	57303885	T	C	0.387363	0.4259	0.06893	0.506684	BOB04G159100	Sodium/hydrogen exchanger family
Chr4	57498993	C	T	0.370332	0.3591	0.058642	0.481319	BOB04G159650	transcription regulatory region sequence-specific DNA binding
Chr4	57558040	T	A	0.380102	0.4105	0.0740741	0.500125	BOB04G159800	Aldo-keto reductase family 4 member
Chr4	59223365	C	A	0.383727	0.3848	0.0833333	0.499628	BOB04G164330	Belongs to the glycosyl hydrolase 17 family
Chr4	59412754	G	T	0.376518	0.4516	0.0864198	0.500984	BOB04G164850	Protein DA1
Chr4	59497029	G	A	0.391969	0.4177	0.0524691	0.508229	BOB04G165030	Isoamylase 1
Chr4	60966834	A	C	0.384667	0.4321	0.0668724	0.505219	BOB04G168940	Belongs to the glycosyl hydrolase 1 family
Chr4	60987028	G	A	0.391949	0.429	0.0648148	0.510017	BOB04G168970	Belongs to the glycosyl hydrolase 1 family
Chr4	60987155	G	T	0.391914	0.4331	0.0555556	0.509949	BOB04G168970	Belongs to the glycosyl hydrolase 1 family
Chr4	61036042	A	C	0.381248	0.3786	0.0833333	0.496693	BOB04G169130	C1 domain
Chr4	61323835	G	C	0.388504	0.4434	0.0833333	0.508919	BOB04G169920	NA
Chr4	61356765	G	A	0.410205	0.4136	0.0462963	0.520696	BOB04G170030	Pectate lyase superfamily protein
Chr4	61375309	A	C	0.382592	0.4455	0.0915638	0.505028	BOB04G170070	Belongs to the formin-like family
Chr4	61389616	G	A	0.386583	0.3796	0.090535	0.50148	BOB04G170110	U5 small nuclear ribonucleoprotein 40 kDa
Chr4	61390323	T	A	0.386936	0.3765	0.0812757	0.500368	BOB04G170120	Catalytic subunit of the molybdopterin synthase complex, a complex that catalyzes the conversion of precursor Z into molybdopterin. Acts by mediating the incorporation of 2 sulfur atoms from thiocarboxylated MOCS2A into precursor Z to generate a dithiolene group
Chr4	61456484	C	T	0.384006	0.4527	0.0658436	0.50586	BOB04G170230	signal recognition particle 14 kDa
Chr4	61873999	G	A	0.378419	0.393	0.0802469	0.496835	BOB04G171090	signal peptide peptidase-like 3
Chr4	62873618	T	A	0.385161	0.427	0.095679	0.50619	BOB04G172930	Camphor resistance CrcB family protein
Chr4	62922825	C	T	0.418381	0.4218	0.0565844	0.528062	BOB04G173020	Glycerol-3-phosphate dehydrogenase NAD( )
Chr4	62923756	A	G	0.378216	0.4053	0.0781893	0.498366	BOB04G173020	Glycerol-3-phosphate dehydrogenase NAD( )
Chr4	63587561	G	C	0.385424	0.4414	0.0812757	0.506709	BOB04G174200	Reticulon-like protein
Chr4	63754842	G	T	0.388525	0.4455	0.0812757	0.508959	BOB04G174580	synthetase
Chr4	63767267	T	G	0.387132	0.4198	0.0751029	0.506233	BOB04G174610	NA
Chr4	63770942	G	A	0.38754	0.4249	0.0761317	0.50703	BOB04G174620	Probable zinc-ribbon domain
Chr4	63771070	G	A	0.391407	0.4465	0.0709877	0.51082	BOB04G174620	Probable zinc-ribbon domain
Chr5	79602	G	A	0.384123	0.4568	0.0730453	0.50609	BOB05G000230	cytochrome P450
Chr5	297462	G	T	0.379059	0.4383	0.0740741	0.502	BOB05G000630	Alpha-dioxygenase
Chr5	311091	C	T	0.381567	0.4259	0.0781893	0.503004	BOB05G000670	CRS1_YhbY
Chr5	312804	G	A	0.396399	0.4228	0.0771605	0.51317	BOB05G000670	CRS1_YhbY
Chr5	326430	A	G	0.393749	0.3992	0.0679012	0.508076	BOB05G000700	Belongs to the WD repeat SEC13 family
Chr5	326763	G	C	0.399973	0.4414	0.0668724	0.516489	BOB05G000700	Belongs to the WD repeat SEC13 family
Chr5	328806	T	C	0.378948	0.4115	0.0802469	0.499803	BOB05G000710	E2F transcription factor-like
Chr5	343144	C	A	0.395623	0.4383	0.0740741	0.51348	BOB05G000740	belongs to the protein kinase superfamily
Chr5	347475	C	T	0.384939	0.4115	0.0761317	0.503842	BOB05G000750	prohibitin homologues
Chr5	443131	G	C	0.385729	0.4239	0.0699588	0.505385	BOB05G000790	homeobox-leucine zipper protein
Chr5	450719	A	T	0.382543	0.4074	0.0679012	0.501065	BOB05G000810	Belongs to the peroxidase family. Classical plant (class III) peroxidase subfamily
Chr5	450875	C	T	0.405714	0.4434	0.063786	0.520519	BOB05G000810	Belongs to the peroxidase family. Classical plant (class III) peroxidase subfamily
Chr5	455179	T	C	0.386816	0.4342	0.0884774	0.507517	BOB05G000820	starch synthase
Chr5	459987	G	A	0.392427	0.3765	0.0740741	0.503827	BOB05G000840	NUC153 domain
Chr5	461681	T	G	0.381351	0.3745	0.0740741	0.49507	BOB05G000850	polypyrimidine tract-binding
Chr5	608274	T	C	0.389519	0.4403	0.0617284	0.509009	BOB05G001010	Transcription initiation factor TFIID subunit 8-like
Chr5	622489	C	T	0.383823	0.4115	0.0853909	0.503565	BOB05G001050	COBRA-like protein 1
Chr5	624575	G	A	0.378686	0.3971	0.0761317	0.497356	BOB05G001060	Uncharacterized conserved protein (DUF2039)
Chr5	674801	C	G	0.376988	0.3621	0.0853909	0.490356	BOB05G001150	Catalyzes the oxidative decarboxylation of 6- phosphogluconate to ribulose 5-phosphate and CO(2), with concomitant reduction of NADP to NADPH
Chr5	900592	C	T	0.379008	0.3961	0.0833333	0.497983	BOB05G001470	zinc finger
Chr5	1027756	A	C	0.383411	0.429	0.0823045	0.504685	BOB05G001660	ATPase family AAA domain-containing protein
Chr5	1040105	G	A	0.385195	0.393	0.0658436	0.500627	BOB05G001700	Accessory subunit of the mitochondrial membrane respiratory chain NADH dehydrogenase (Complex I), that is believed not to be involved in catalysis. Complex I functions in the transfer of electrons from NADH to the respiratory chain. The immediate electron acceptor for the enzyme is believed to be ubiquinone
Chr5	1049916	T	G	0.381603	0.4095	0.0751029	0.501136	BOB05G001720	Belongs to the small GTPase superfamily. Arf family
Chr5	1190429	C	T	0.391547	0.3745	0.0679012	0.502166	BOB05G001850	Domain of unknown function (DUF4228)
Chr5	1213401	C	A	0.384278	0.4023	0.115226	0.504456	BOB05G001880	Belongs to the helicase family. Dicer subfamily
Chr5	1227805	A	T	0.37956	0.4599	0.0648148	0.502996	BOB05G001890	ASCH
Chr5	1270496	C	A	0.371438	0.3837	0.06893	0.489006	BOB05G001990	Acetyl CoA (Z)-3-hexen-1-ol acetyltransferase
Chr5	1365597	G	A	0.386506	0.4362	0.0699588	0.50691	BOB05G002090	ribosomal protein s2
Chr5	1412716	T	A	0.381108	0.4033	0.0781893	0.500169	BOB05G002180	inactive leucine-rich repeat receptor-like protein kinase At3g03770
Chr5	1414505	A	G	0.397213	0.4444	0.0699588	0.514744	BOB05G002180	inactive leucine-rich repeat receptor-like protein kinase At3g03770
Chr5	1438537	C	T	0.38711	0.4537	0.0761317	0.508095	BOB05G002240	Belongs to the syntaxin family
Chr5	2089432	T	G	0.387765	0.4095	0.114198	0.507471	BOB05G003150	DNA-damage-repair toleration protein
Chr5	2190845	C	T	0.395877	0.4475	0.0751029	0.513973	BOB05G003380	Trafficking protein particle complex subunit
Chr5	2220085	G	A	0.395829	0.4486	0.0679012	0.51388	BOB05G003460	Serine/Threonine protein kinases, catalytic domain
Chr5	2454443	C	T	0.382585	0.4568	0.0679012	0.505015	BOB05G003930	Acyl-CoA binding protein
Chr5	2584377	G	T	0.391454	0.4362	0.095679	0.510913	BOB05G004060	60s ribosomal protein
Chr5	2624274	C	A	0.390964	0.427	0.0864198	0.509956	BOB05G004190	PHD-finger
Chr5	3011671	A	G	0.389904	0.4023	0.0730453	0.506058	BOB05G004940	SAC3/GANP family
Chr5	4246754	G	C	0.375309	0.3745	0.0596708	0.488969	BOB05G007830	BEST Arabidopsis thaliana protein match is proline-rich family protein (TAIR AT3G09000.1)
Chr5	4247372	C	T	0.396626	0.3817	0.0792181	0.508359	BOB05G007830	BEST Arabidopsis thaliana protein match is proline-rich family protein (TAIR AT3G09000.1)
Chr5	4253522	A	C	0.388612	0.4516	0.0864198	0.50913	BOB05G007840	BTB POZ domain-containing protein
Chr5	4344936	C	T	0.478761	0.4321	0.0380658	0.572813	BOB05G008130	solute:proton antiporter activity
Chr5	4407551	G	C	0.385635	0.4527	0.0864198	0.507123	BOB05G008370	UNC93-like protein 3
Chr5	4776250	C	A	0.378905	0.4434	0.0576132	0.501696	BOB05G009310	Belongs to the TRAFAC class myosin-kinesin ATPase superfamily. Kinesin family
Chr5	4823895	A	G	0.388223	0.4023	0.0997942	0.506483	BOB05G009380	serine carboxypeptidase-like 49
Chr5	5024217	G	C	0.376814	0.4074	0.0771605	0.497566	BOB05G009930	nucleic acid binding
Chr5	5398012	A	C	0.395283	0.4383	0.058642	0.512821	BOB05G010880	RNA-binding component of the eukaryotic translation initiation factor 3 (eIF-3) complex, which is involved in protein synthesis of a specialized repertoire of mRNAs and, together with other initiation factors, stimulates binding of mRNA and methionyl-tRNAi to the 40S ribosome. The eIF-3 complex specifically targets and initiates translation of a subset of mRNAs involved in cell proliferation. Thi…
Chr5	5398330	T	G	0.384477	0.4136	0.0627572	0.502942	BOB05G010880	RNA-binding component of the eukaryotic translation initiation factor 3 (eIF-3) complex, which is involved in protein synthesis of a specialized repertoire of mRNAs and, together with other initiation factors, stimulates binding of mRNA and methionyl-tRNAi to the 40S ribosome. The eIF-3 complex specifically targets and initiates translation of a subset of mRNAs involved in cell proliferation. Thi…
Chr5	5800431	C	T	0.449826	0.4362	0.0534979	0.551629	BOB05G012060	Agamous-like MADS-box protein
Chr5	5828959	C	G	0.39412	0.4033	0.0658436	0.508787	BOB05G012140	Belongs to the syntaxin family
Chr5	5835409	G	A	0.387435	0.3951	0.0720165	0.503118	BOB05G012150	assists the folding of proteins upon ATP hydrolysis
Chr5	5835823	G	T	0.393685	0.4033	0.058642	0.507954	BOB05G012150	assists the folding of proteins upon ATP hydrolysis
Chr5	5835962	G	A	0.400933	0.3673	0.0555556	0.50663	BOB05G012150	assists the folding of proteins upon ATP hydrolysis
Chr5	5888845	A	T	0.380528	0.4424	0.0627572	0.502921	BOB05G012260	Belongs to the peptidase C19 family
Chr5	5892031	G	A	0.380772	0.3909	0.176955	0.503404	BOB05G012260	Belongs to the peptidase C19 family
Chr5	6178530	G	A	0.368667	0.3971	0.0288066	0.485552	BOB05G013120	Protein of unknown function, DUF547
Chr5	6225859	T	C	0.384109	0.4558	0.0720165	0.506063	BOB05G013260	phosphatase 2C
Chr5	7239916	G	C	0.399898	0.4362	0.0730453	0.516345	BOB05G016060	positive regulation of auxin mediated signaling pathway
Chr5	8151728	A	G	0.383862	0.4372	0.0864198	0.505574	BOB05G018550	mitogen-activated protein kinase
Chr5	8446416	A	G	0.387765	0.429	0.0751029	0.507471	BOB05G019230	NA
Chr5	8584178	A	G	0.386494	0.4002	0.0709877	0.50313	BOB05G019600	NA
Chr5	8657784	A	C	0.389646	0.4105	0.0812757	0.507391	BOB05G019810	WD domain, G-beta repeat
Chr5	11092515	C	G	0.377955	0.4475	0.0812757	0.501818	BOB05G026280	phosphoethanolamine N-methyltransferase activity
Chr5	11110510	A	G	0.384936	0.4362	0.0679012	0.505747	BOB05G026330	Homeodomain
Chr5	11116281	G	A	0.379234	0.4187	0.121399	0.502348	BOB05G026340	PPR repeat
Chr5	11126544	G	C	0.39424	0.3951	0.0843621	0.509016	BOB05G026380	Domain in histone families 1 and 5
Chr5	11262334	G	A	0.383451	0.4074	0.0853909	0.502837	BOB05G026690	gpi-anchored protein
Chr5	11308053	C	T	0.3758	0.3889	0.0967078	0.495578	BOB05G026840	Pentacotripeptide-repeat region of PRORP
Chr5	11311728	A	C	0.398081	0.4187	0.0925926	0.514623	BOB05G026840	Pentacotripeptide-repeat region of PRORP
Chr5	12891698	G	T	0.381248	0.3961	0.0483539	0.496693	BOB05G031280	kelch repeat-containing F-box family protein
Chr5	12961163	A	G	0.394378	0.4527	0.0606996	0.512894	BOB05G031430	DNA binding protein binding transcription activator transcription factor
Chr5	18361138	C	A	0.380753	0.4053	0.0679012	0.499477	BOB05G046960	Transcription factor
Chr5	33837605	C	A	0.422358	0.4043	0.0349794	0.527858	BOB05G092730	Plant transposase (Ptta/En/Spm family)
Chr5	34228257	C	T	0.38239	0.4609	0.0421811	0.504628	BOB05G093890	NA
Chr5	37581452	G	A	0.382088	0.4424	0.063786	0.504033	BOB05G103670	nucleic acid binding transcription factor zinc ion binding
Chr5	38017804	G	A	0.379291	0.4455	0.0709877	0.50246	BOB05G104900	Family of unknown function (DUF572)
Chr5	38017906	A	G	0.386426	0.4331	0.0730453	0.506752	BOB05G104900	Family of unknown function (DUF572)
Chr5	38308893	C	T	0.389387	0.4372	0.0627572	0.508753	BOB05G105670	BEST Arabidopsis thaliana protein match is
Chr5	38309421	A	T	0.3928	0.4475	0.0627572	0.511672	BOB05G105670	BEST Arabidopsis thaliana protein match is
Chr5	38315741	T	C	0.385147	0.4002	0.0740741	0.502373	BOB05G105680	heat shock
Chr5	38316752	T	C	0.387636	0.3971	0.0709877	0.503504	BOB05G105680	heat shock
Chr5	39076135	G	A	0.408684	0.4578	0.0514403	0.52278	BOB05G107700	Belongs to the disease resistance NB-LRR family
Chr5	39165198	C	A	0.395885	0.4568	0.0576132	0.513988	BOB05G107980	Leucine-rich repeat protein kinase family protein
Chr5	39168135	T	A	0.384018	0.4558	0.0606996	0.505882	BOB05G107990	UPF0392 protein
Chr5	39168603	T	G	0.391475	0.4568	0.0565844	0.510953	BOB05G107990	UPF0392 protein
Chr5	39429869	T	A	0.392858	0.4434	0.0751029	0.511786	BOB05G108730	E3 ubiquitin-protein ligase
Chr5	40285991	T	C	0.378686	0.3971	0.0761317	0.497356	BOB05G111380	Thiamine monophosphate synthase
Chr5	40297942	G	T	0.378502	0.3436	0.0534979	0.482877	BOB05G111400	NA
Chr5	41262996	C	G	0.386868	0.4403	0.0792181	0.50762	BOB05G114170	N-terminal C2 in EEIG1 and EHBP1 proteins
Chr5	41272133	G	C	0.383202	0.4372	0.058642	0.504273	BOB05G114190	F-box kelch-repeat protein
Chr5	41288721	C	T	0.3897	0.4486	0.0534979	0.509365	BOB05G114240	expressed protein
Chr5	41522516	T	A	0.394986	0.4074	0.0473251	0.508686	BOB05G114960	WAT1-related protein
Chr5	41572430	A	G	0.385115	0.4455	0.0565844	0.506099	BOB05G115100	Belongs to the TRAFAC class myosin-kinesin ATPase superfamily. Kinesin family
Chr5	41660652	T	C	0.384936	0.4424	0.0555556	0.505747	BOB05G115300	Serine threonine-protein kinase
Chr5	41661790	A	G	0.376026	0.4486	0.0565844	0.500003	BOB05G115300	Serine threonine-protein kinase
Chr5	41669477	T	G	0.380339	0.4455	0.0493827	0.502547	BOB05G115300	Serine threonine-protein kinase
Chr5	41878432	C	T	0.386945	0.4465	0.0720165	0.507771	BOB05G115830	2-oxoisovalerate dehydrogenase subunit alpha 1
Chr5	42163940	C	T	0.381619	0.3807	0.0648148	0.495583	BOB05G116780	Wall-associated receptor kinase
Chr5	42312868	C	G	0.394114	0.4362	0.0761317	0.512382	BOB05G117210	Domain of unknown function (DUF4228)
Chr5	42483947	G	C	0.388552	0.4465	0.0823045	0.509012	BOB05G117640	DEAD-box ATP-dependent RNA helicase
Chr5	42499199	C	T	0.398776	0.4506	0.06893	0.515965	BOB05G117670	Transcription factor that specifically binds AT-rich DNA sequences related to the nuclear matrix attachment regions (MARs)
Chr5	42610803	T	C	0.382339	0.4465	0.0679012	0.504528	BOB05G117990	Belongs to the major facilitator superfamily. Sugar transporter (TC 2.A.1.1) family
Chr5	42702377	T	A	0.375517	0.3807	0.0668724	0.491215	BOB05G118240	Fanconi anemia group J protein
Chr5	42702548	C	G	0.38299	0.4105	0.0699588	0.501937	BOB05G118240	Fanconi anemia group J protein
Chr5	42713540	T	A	0.393222	0.392	0.0740741	0.507068	BOB05G118270	High mobility group B
Chr5	42886860	G	C	0.391107	0.4105	0.0802469	0.508383	BOB05G118760	4-coumarate-CoA
Chr5	42917099	G	C	0.395229	0.4249	0.0833333	0.512716	BOB05G118840	tRNA pseudouridine synthase
Chr5	42919228	T	C	0.38974	0.4321	0.0884774	0.509443	BOB05G118840	tRNA pseudouridine synthase
Chr5	43167147	T	C	0.384009	0.3519	0.06893	0.491415	BOB05G119630	Pentacotripeptide-repeat region of PRORP
Chr5	43904411	G	A	0.373751	0.4074	0.0524691	0.493515	BOB05G121560	Plays a role in the arabinosylation of cell wall components. Involved in the arabinosylation of extensin proteins in root hair cells. Extensins are structural glycoproteins present in cell walls and its arabinosylation is important for root hair cell development
Chr5	43918172	G	A	0.382617	0.4547	0.0781893	0.505078	BOB05G121600	Pathogenesis-related
Chr5	43927074	A	G	0.382617	0.4527	0.0823045	0.505078	BOB05G121610	Sin3 binding region of histone deacetylase complex subunit SAP30
Chr5	43956519	G	C	0.40856	0.4403	0.0720165	0.522543	BOB05G121690	Belongs to the glycosyltransferase 8 family
Chr5	44041257	C	T	0.386219	0.4177	0.058642	0.504454	BOB05G121860	Auxin response factors (ARFs) are transcriptional factors that bind specifically to the DNA sequence 5'-TGTCTC-3' found in the auxin-responsive promoter elements (AuxREs)
Chr5	44042215	A	T	0.389226	0.3848	0.0555556	0.501213	BOB05G121860	Auxin response factors (ARFs) are transcriptional factors that bind specifically to the DNA sequence 5'-TGTCTC-3' found in the auxin-responsive promoter elements (AuxREs)
Chr5	44043688	A	G	0.379929	0.3899	0.063786	0.495997	BOB05G121860	Auxin response factors (ARFs) are transcriptional factors that bind specifically to the DNA sequence 5'-TGTCTC-3' found in the auxin-responsive promoter elements (AuxREs)
Chr5	44192203	A	G	0.38263	0.4506	0.0925926	0.505104	BOB05G122290	Zein-binding
Chr5	44192311	C	G	0.38263	0.4558	0.0833333	0.505104	BOB05G122290	Zein-binding
Chr5	44192473	A	G	0.381101	0.4496	0.0884774	0.504056	BOB05G122290	Zein-binding
Chr5	46502339	T	G	0.389614	0.4424	0.0617284	0.509196	BOB05G128770	Contains the following InterPro domains WD40 repeat 2 (InterPro IPR019782), WD40 repeat-like-containing domain (InterPro IPR011046), WD40 repeat, conserved site (InterPro IPR019775), WD40-repeat-containing domain (InterPro IPR017986), WD40 YVTN repeat-like-containing domain (InterPro IPR015943), WD40 repeat (InterPro IPR001680), WD40 repeat, subgroup (InterPro IPR019781)
Chr5	46514490	G	A	0.391365	0.4486	0.063786	0.510739	BOB05G128800	BEST Arabidopsis thaliana protein match is
Chr5	47373377	G	C	0.38905	0.4218	0.0823045	0.508095	BOB05G131020	CAAX amino terminal protease family protein
Chr5	48822907	T	G	0.387008	0.4434	0.0833333	0.507895	BOB05G135000	Zinc finger, C3HC4 type (RING finger)
Chr5	48826245	T	A	0.383955	0.4383	0.090535	0.505758	BOB05G135010	Belongs to the cation transport ATPase (P-type) (TC 3.A.3) family. Type IV subfamily
Chr5	49193661	T	G	0.384123	0.4342	0.118313	0.50609	BOB05G135930	S-locus lectin protein kinase family protein
Chr5	49217709	A	C	0.376076	0.3663	0.0679012	0.488618	BOB05G135980	ABC1 family
Chr5	49342558	G	T	0.378732	0.4414	0.0555556	0.501353	BOB05G136370	Probably involved in membrane trafficking
Chr5	49354395	G	T	0.387854	0.4321	0.0720165	0.507644	BOB05G136410	Leucine rich repeat
Chr5	49357694	A	T	0.382604	0.4444	0.095679	0.505051	BOB05G136410	Leucine rich repeat
Chr5	49386621	A	G	0.385324	0.4424	0.0730453	0.506512	BOB05G136510	BEST Arabidopsis thaliana protein match is
Chr5	49391604	A	G	0.384851	0.427	0.0833333	0.505581	BOB05G136510	BEST Arabidopsis thaliana protein match is
Chr5	49394197	T	C	0.380242	0.3909	0.0658436	0.496602	BOB05G136510	BEST Arabidopsis thaliana protein match is
Chr5	49394769	C	T	0.374196	0.3827	0.0658436	0.490542	BOB05G136510	BEST Arabidopsis thaliana protein match is
Chr5	49398195	T	C	0.382193	0.4167	0.0730453	0.502292	BOB05G136520	Wings apart-like protein regulation of heterochromatin
Chr5	49407524	C	T	0.395623	0.4342	0.0823045	0.51348	BOB05G136560	DnaJ C terminal domain
Chr5	49416043	A	T	0.380624	0.427	0.0977366	0.503111	BOB05G136580	chlorophyll binding
Chr5	49418531	A	C	0.383808	0.4372	0.0833333	0.505467	BOB05G136590	Belongs to the nonaspanin (TM9SF) (TC 9.A.2) family
Chr5	49420881	C	T	0.378131	0.3827	0.0565844	0.492541	BOB05G136590	Belongs to the nonaspanin (TM9SF) (TC 9.A.2) family
Chr5	49442876	A	G	0.391419	0.4403	0.0843621	0.510845	BOB05G136640	Translation initiation factor IF-2, N-terminal region
Chr5	49458054	C	G	0.385566	0.4002	0.0812757	0.503184	BOB05G136680	Leucine-rich repeat protein kinase family protein
Chr5	49458180	G	A	0.392053	0.3889	0.0853909	0.506598	BOB05G136680	Leucine-rich repeat protein kinase family protein
Chr5	49459221	T	C	0.38723	0.3899	0.0792181	0.502723	BOB05G136680	Leucine-rich repeat protein kinase family protein
Chr5	49621849	A	G	0.3871	0.4465	0.0884774	0.508076	BOB05G137110	RNA polymerase II regulatory region DNA binding
Chr5	49626356	G	T	0.38861	0.4496	0.0884774	0.509126	BOB05G137120	WD domain, G-beta repeat
Chr5	49660793	A	T	0.378216	0.4043	0.0802469	0.498366	BOB05G137260	RING-type E3 ubiquitin transferase
Chr5	49660979	G	T	0.38006	0.3735	0.0792181	0.494411	BOB05G137260	RING-type E3 ubiquitin transferase
Chr5	49667630	T	A	0.374018	0.3796	0.0895062	0.492098	BOB05G137280	Leucine Rich repeat
Chr5	50188299	T	C	0.380528	0.428	0.0915638	0.502921	BOB05G138470	Double-stranded RNA-binding protein
Chr5	50234089	G	T	0.374921	0.4146	0.0895062	0.497807	BOB05G138590	Belongs to the class-I aminoacyl-tRNA synthetase family
Chr5	50266027	T	C	0.389519	0.43	0.0823045	0.509009	BOB05G138670	Serine threonine-protein kinase
Chr5	50271034	T	C	0.390586	0.4342	0.058642	0.50922	BOB05G138690	Emp24 gp25L p24 family
Chr5	50422896	C	A	0.385548	0.4527	0.06893	0.506952	BOB05G139070	Golgi membrane protein involved in vesicular trafficking
Chr5	50593733	T	C	0.376236	0.4136	0.0853909	0.498405	BOB05G139540	Belongs to the major facilitator superfamily. Sugar transporter (TC 2.A.1.1) family
Chr5	50618602	C	A	0.388442	0.4105	0.0884774	0.50691	BOB05G139600	Zinc ion binding
Chr5	50655278	G	C	0.386868	0.4475	0.0648148	0.50762	BOB05G139710	Plant protein of unknown function (DUF936)
Chr5	50655945	T	A	0.418111	0.4393	0.0658436	0.52913	BOB05G139710	Plant protein of unknown function (DUF936)
Chr5	50909211	C	T	0.383104	0.3992	0.131687	0.504081	BOB05G140460	Esterase lipase thioesterase family protein
Chr5	51708436	T	C	0.382088	0.4393	0.0699588	0.504033	BOB05G142480	Belongs to the AAA ATPase family
Chr5	51745926	T	G	0.379725	0.3724	0.0452675	0.490212	BOB05G142560	acyl-coenzyme A oxidase
Chr5	51774675	C	A	0.375065	0.3858	0.0514403	0.490345	BOB05G142660	pentatricopeptide
Chr5	52439052	C	A	0.377627	0.4023	0.0740741	0.497212	BOB05G144270	NA
Chr6	1836717	A	G	0.382544	0.4465	0.0833333	0.504933	BOB06G005450	Remorin, C-terminal region
Chr6	1872141	G	A	0.38754	0.4239	0.0781893	0.50703	BOB06G005510	GDP-fucose protein O-fucosyltransferase
Chr6	1876513	C	T	0.406413	0.4208	0.0771605	0.520146	BOB06G005520	Mitochondrial K+-H+ exchange-related
Chr6	1887632	T	G	0.381162	0.4177	0.0833333	0.502206	BOB06G005530	Belongs to the AAA ATPase family
Chr6	2204737	A	T	0.382957	0.3868	0.090535	0.499992	BOB06G006480	NA
Chr6	2208734	A	T	0.377817	0.43	0.105967	0.501543	BOB06G006490	leucine-rich repeat receptor-like serine threonine-protein kinase At3g14840
Chr6	2231359	T	C	0.391062	0.429	0.0864198	0.510146	BOB06G006550	ABC transporter
Chr6	2235159	T	A	0.378212	0.3868	0.0895062	0.496434	BOB06G006550	ABC transporter
Chr6	2565634	G	T	0.399673	0.4352	0.0648148	0.515911	BOB06G007680	Stigma-specific protein, Stig1
Chr6	2691014	T	C	0.384134	0.4527	0.0853909	0.506111	BOB06G008090	GTPase involved in pre-60S ribosomal subunit maturation
Chr6	3440748	T	G	0.391536	0.4527	0.0730453	0.511072	BOB06G010540	Belongs to the class-I aminoacyl-tRNA synthetase family
Chr6	3440992	A	C	0.377447	0.3807	0.0709877	0.493071	BOB06G010540	Belongs to the class-I aminoacyl-tRNA synthetase family
Chr6	4229120	G	A	0.382501	0.4619	0.0483539	0.504848	BOB06G012610	phosphatase 2A 55 kDa regulatory subunit B
Chr6	4489047	T	C	0.395892	0.4599	0.0524691	0.514003	BOB06G013340	PB1 domain
Chr6	4793482	C	T	0.428134	0.3879	0.0534979	0.531243	BOB06G014120	NA
Chr6	4863310	C	G	0.48722	0.3735	0.0483539	0.576001	BOB06G014310	transposition, RNA-mediated
Chr6	5325320	T	A	0.373962	0.3693	0.0565844	0.486403	BOB06G015630	Belongs to the GRAS family
Chr6	5543934	G	A	0.389543	0.43	0.0833333	0.509058	BOB06G016270	Belongs to the TRAFAC class myosin-kinesin ATPase superfamily. Myosin family
Chr6	5564741	T	A	0.39065	0.429	0.0709877	0.509344	BOB06G016330	Thioredoxin X
Chr6	6109761	G	A	0.387114	0.4558	0.0730453	0.508103	BOB06G017900	Carboxylesterase
Chr6	6303842	C	T	0.381058	0.4578	0.0648148	0.503971	BOB06G018380	Binds the poly(A) tail of mRNA
Chr6	6304745	C	A	0.384851	0.4352	0.0668724	0.505581	BOB06G018380	Binds the poly(A) tail of mRNA
Chr6	6433329	G	C	0.378878	0.4321	0.0792181	0.501641	BOB06G018660	WD40 repeats
Chr6	6434740	G	C	0.385548	0.4496	0.0751029	0.506952	BOB06G018660	WD40 repeats
Chr6	6435360	A	G	0.381105	0.4558	0.0771605	0.504064	BOB06G018660	WD40 repeats
Chr6	6435549	T	G	0.385618	0.4578	0.06893	0.50709	BOB06G018660	WD40 repeats
Chr6	6436449	C	A	0.390091	0.464	0.0617284	0.510129	BOB06G018670	PHD zinc finger
Chr6	6438018	T	C	0.385613	0.4568	0.0699588	0.507081	BOB06G018670	PHD zinc finger
Chr6	6525422	G	A	0.388534	0.4619	0.0493827	0.508978	BOB06G018940	Belongs to the PI3 PI4-kinase family
Chr6	6798999	C	T	0.381032	0.4578	0.0617284	0.503918	BOB06G019750	transcription factor
Chr6	6870088	G	A	0.379492	0.4588	0.058642	0.50286	BOB06G020000	NA
Chr6	7550072	C	G	0.388543	0.4444	0.0853909	0.508995	BOB06G021960	Outer arm dynein light chain 1 protein
Chr6	7607703	T	A	0.414205	0.4516	0.063786	0.526607	BOB06G022050	glutamine synthetase
Chr6	8153602	C	T	0.383233	0.427	0.0802469	0.504335	BOB06G023360	Reversible hydration of carbon dioxide
Chr6	8269334	G	A	0.384278	0.4228	0.0740741	0.504456	BOB06G023610	Desiccation-related protein PCC13-62-like
Chr6	8475928	C	T	0.378441	0.3817	0.0812757	0.494989	BOB06G024110	MAP kinase kinase kinase activity
Chr6	8919680	T	A	0.390682	0.4259	0.0781893	0.509405	BOB06G025680	3beta-hydroxysteroid-dehydrogenase decarboxylase isoform
Chr6	8919782	A	G	0.394094	0.4321	0.0833333	0.512342	BOB06G025680	3beta-hydroxysteroid-dehydrogenase decarboxylase isoform
Chr6	9020021	C	T	0.371694	0.3765	0.0679012	0.487597	BOB06G025940	Natural resistance-associated macrophage protein
Chr6	9027683	T	C	0.376523	0.4558	0.0792181	0.500993	BOB06G025950	Belongs to the cyclin family
Chr6	9305873	C	T	0.378403	0.3755	0.0740741	0.493063	BOB06G026700	ABSCISIC ACID-INSENSITIVE 5-like protein
Chr6	14283462	C	G	0.37603	0.3621	0.0606996	0.486748	BOB06G043740	NA
Chr6	19247053	A	T	0.381463	0.427	0.0730453	0.502799	BOB06G058690	mitogen-activated protein kinase
Chr6	19309607	G	C	0.401398	0.4372	0.0740741	0.517462	BOB06G058860	NA
Chr6	19516035	A	C	0.400184	0.4486	0.06893	0.516895	BOB06G059490	Serine threonine-protein kinase
Chr6	19516851	C	G	0.395936	0.4558	0.0709877	0.514087	BOB06G059490	Serine threonine-protein kinase
Chr6	23533147	A	T	0.38397	0.4074	0.0658436	0.501956	BOB06G070610	EamA-like transporter family
Chr6	23561016	A	G	0.388647	0.4259	0.0627572	0.507309	BOB06G070720	Tudor PWWP MBT superfamily protein
Chr6	23562804	T	A	0.398789	0.4259	0.0555556	0.514211	BOB06G070720	Tudor PWWP MBT superfamily protein
Chr6	23613340	C	A	0.390938	0.4352	0.06893	0.509905	BOB06G070840	Oleosin
Chr6	23913876	G	A	0.378133	0.3539	0.0545267	0.48551	BOB06G071620	UPF0392 protein
Chr6	23914824	G	A	0.371429	0.3529	0.0534979	0.479854	BOB06G071620	UPF0392 protein
Chr6	23945052	G	A	0.425865	0.3714	0.0740741	0.528534	BOB06G071710	BEST Arabidopsis thaliana protein match is
Chr6	26263323	A	C	0.382244	0.4228	0.110082	0.50434	BOB06G078030	Belongs to the synaptobrevin family
Chr6	26284432	G	A	0.437209	0.3673	0.0596708	0.535564	BOB06G078070	NA
Chr6	26311242	A	G	0.382435	0.4393	0.0884774	0.504719	BOB06G078120	SAC3 family
Chr6	26311490	C	A	0.391541	0.4414	0.0967078	0.511082	BOB06G078120	SAC3 family
Chr6	26313729	A	T	0.381603	0.4033	0.0874486	0.501136	BOB06G078120	SAC3 family
Chr6	26419335	G	C	0.394459	0.4619	0.0524691	0.513053	BOB06G078310	DJ-1 protein homolog
Chr6	26800110	A	G	0.503478	0.4023	0.0483539	0.591219	BOB06G079340	Ulp1 protease family, C-terminal catalytic domain
Chr6	26811297	T	G	0.379228	0.427	0.0555556	0.500356	BOB06G079390	Belongs to the chalcone isomerase family
Chr6	29540819	A	G	0.388331	0.3868	0.0792181	0.503035	BOB06G086970	NA
Chr6	30879510	T	C	0.377133	0.4115	0.0751029	0.498195	BOB06G090830	Belongs to the TRAFAC class dynamin-like GTPase superfamily. Dynamin Fzo YdjA family
Chr6	31053929	G	A	0.404388	0.4599	0.0380658	0.519708	BOB06G091260	ABC transporter B family member
Chr6	31054610	A	T	0.386652	0.4424	0.063786	0.507195	BOB06G091260	ABC transporter B family member
Chr6	31064552	C	G	0.389646	0.4259	0.0504115	0.507391	BOB06G091270	Acts in the modification of cell walls via demethylesterification of cell wall pectin
Chr6	31066141	C	T	0.385602	0.4486	0.0843621	0.50706	BOB06G091270	Acts in the modification of cell walls via demethylesterification of cell wall pectin
Chr6	31068101	C	T	0.381032	0.4403	0.0967078	0.503918	BOB06G091280	Invertase pectin methylesterase inhibitor family protein
Chr6	31129793	A	G	0.38628	0.3889	0.0679012	0.5009	BOB06G091530	Terpene synthase
Chr6	31152512	A	G	0.378176	0.427	0.0679012	0.500252	BOB06G091560	heat shock protein binding unfolded protein binding
Chr6	31152953	T	C	0.387887	0.3961	0.0545267	0.502184	BOB06G091560	heat shock protein binding unfolded protein binding
Chr6	31269356	A	C	0.388331	0.393	0.0668724	0.503035	BOB06G091900	NA
Chr6	31391888	T	C	0.402783	0.4064	0.0853909	0.516638	BOB06G092130	Gibberellin receptor
Chr6	31519033	C	A	0.395936	0.4486	0.0853909	0.514087	BOB06G092470	Belongs to the ABC transporter superfamily. ABCG family. PDR (TC 3.A.1.205) subfamily
Chr6	31576920	A	C	0.390619	0.4383	0.0514403	0.509283	BOB06G092620	posttranslational protein targeting to membrane, translocation
Chr6	31738184	G	T	0.383911	0.4177	0.0751029	0.503737	BOB06G093040	Protein of unknown function (DUF642)
Chr6	33084189	T	C	0.387882	0.4239	0.0895062	0.5077	BOB06G096990	ribosomal protein
Chr6	33911001	C	T	0.44716	0.427	0.0555556	0.549419	BOB06G099350	NA
Chr6	34479436	A	G	0.382501	0.4053	0.102881	0.502896	BOB06G100830	Flavodoxin family protein radical SAM domain-containing protein
Chr6	34492482	A	G	0.382584	0.4126	0.090535	0.503059	BOB06G100870	glycine--tRNA ligase 2, chloroplastic
Chr6	34494441	G	C	0.378878	0.427	0.0895062	0.501641	BOB06G100870	glycine--tRNA ligase 2, chloroplastic
Chr6	34519537	A	T	0.388605	0.4444	0.0967078	0.509117	BOB06G100970	Plays a role in the arabinosylation of cell wall components. Involved in the arabinosylation of extensin proteins in root hair cells. Extensins are structural glycoproteins present in cell walls and its arabinosylation is important for root hair cell development
Chr6	34649611	G	A	0.384634	0.4146	0.100823	0.505155	BOB06G101460	Belongs to the aldehyde dehydrogenase family
Chr6	35006515	T	C	0.392206	0.4311	0.06893	0.510516	BOB06G102500	phosphoribosylformylglycinamidine synthase
Chr6	35007775	T	C	0.385399	0.4228	0.063786	0.504742	BOB06G102500	phosphoribosylformylglycinamidine synthase
Chr6	35008069	C	G	0.394318	0.4177	0.0709877	0.510954	BOB06G102500	phosphoribosylformylglycinamidine synthase
Chr6	35008804	T	C	0.386189	0.429	0.0730453	0.506287	BOB06G102500	phosphoribosylformylglycinamidine synthase
Chr6	35008981	T	C	0.392593	0.4362	0.0740741	0.51127	BOB06G102500	phosphoribosylformylglycinamidine synthase
Chr6	35011206	A	C	0.394208	0.4403	0.0730453	0.512564	BOB06G102510	DNAJ heat shock N-terminal domain-containing protein
Chr6	35014642	G	C	0.400174	0.4434	0.0781893	0.516878	BOB06G102520	NA
Chr6	35015177	C	T	0.433549	0.429	0.0606996	0.539685	BOB06G102520	NA
Chr6	35269363	A	G	0.369272	0.3673	0.0617284	0.482948	BOB06G103220	Lipase family
Chr6	35316809	T	A	0.388608	0.4465	0.0936214	0.509122	BOB06G103370	Transcription termination and cleavage factor C-terminal
Chr6	35391220	T	A	0.37862	0.392	0.0853909	0.497227	BOB06G103560	Animal haem peroxidase
Chr6	35392339	G	A	0.384831	0.3981	0.0730453	0.501762	BOB06G103560	Animal haem peroxidase
Chr6	35394481	A	G	0.390038	0.4496	0.0761317	0.510026	BOB06G103570	mitogen-activated protein kinase
Chr6	35437183	A	G	0.382715	0.4012	0.0833333	0.5014	BOB06G103710	phosphoethanolamine N-methyltransferase
Chr6	35448053	G	A	0.426352	0.4136	0.06893	0.533725	BOB06G103740	May act as a component of the auxin efflux carrier
Chr6	35477024	T	C	0.393018	0.4516	0.0781893	0.512098	BOB06G103820	kinase kinase
Chr6	35479884	T	C	0.38176	0.429	0.0781893	0.503385	BOB06G103830	hydrolase, alpha beta fold family protein
Chr6	35501417	T	C	0.378131	0.3796	0.0627572	0.492541	BOB06G103870	Its function is described as protein serine threonine kinase activity, protein kinase activity, kinase activity, ATP binding
Chr6	35503895	A	G	0.380696	0.3889	0.0761317	0.497479	BOB06G103870	Its function is described as protein serine threonine kinase activity, protein kinase activity, kinase activity, ATP binding
Chr6	35518946	G	A	0.394366	0.4372	0.090535	0.512873	BOB06G103890	homeobox-leucine zipper protein
Chr6	35527679	C	G	0.382613	0.4496	0.0874486	0.50507	BOB06G103920	Lysine methyltransferase
Chr6	35615698	A	C	0.372816	0.3735	0.06893	0.487882	BOB06G104090	Belongs to the MIP aquaporin (TC 1.A.8) family
Chr6	35617784	C	T	0.381114	0.4475	0.0967078	0.504081	BOB06G104100	Functions in the early steps of protein synthesis of a small number of specific mRNAs. Acts by directing the binding of methionyl-tRNAi to 40S ribosomal subunits. In contrast to the eIF- 2 complex, it binds methionyl-tRNAi to 40 S subunits in a codon- dependent manner, whereas the eIF-2 complex binds methionyl-tRNAi to 40 S subunits in a GTP-dependent manner. May act by impiging the expression of…
Chr6	35618901	C	G	0.394398	0.4393	0.0895062	0.512935	BOB06G104100	Functions in the early steps of protein synthesis of a small number of specific mRNAs. Acts by directing the binding of methionyl-tRNAi to 40S ribosomal subunits. In contrast to the eIF- 2 complex, it binds methionyl-tRNAi to 40 S subunits in a codon- dependent manner, whereas the eIF-2 complex binds methionyl-tRNAi to 40 S subunits in a GTP-dependent manner. May act by impiging the expression of…
Chr6	35682955	C	A	0.376868	0.3848	0.0751029	0.493823	BOB06G104230	Belongs to the protein kinase superfamily. Ser Thr protein kinase family
Chr6	35683462	A	G	0.38513	0.4187	0.0658436	0.504215	BOB06G104230	Belongs to the protein kinase superfamily. Ser Thr protein kinase family
Chr6	35690068	G	A	0.389824	0.4167	0.0730453	0.507738	BOB06G104240	Belongs to the SNF7 family
Chr6	35690344	T	C	0.384257	0.4043	0.0771605	0.502514	BOB06G104240	Belongs to the SNF7 family
Chr6	36441471	C	A	0.37437	0.3868	0.0596708	0.490878	BOB06G106290	ABC transporter
Chr6	36449285	G	A	0.375758	0.393	0.0648148	0.493568	BOB06G106290	ABC transporter
Chr6	36534953	C	T	0.389591	0.4383	0.06893	0.509151	BOB06G106490	Belongs to the protein kinase superfamily. Ser Thr protein kinase family
Chr6	36535061	C	T	0.389415	0.4311	0.0761317	0.508806	BOB06G106490	Belongs to the protein kinase superfamily. Ser Thr protein kinase family
Chr6	36537373	C	T	0.382053	0.4177	0.0679012	0.502017	BOB06G106490	Belongs to the protein kinase superfamily. Ser Thr protein kinase family
Chr6	36562089	T	C	0.386494	0.4053	0.0606996	0.50313	BOB06G106570	Binds the poly(A) tail of mRNA
Chr6	36808172	G	C	0.382416	0.4187	0.0740741	0.502729	BOB06G107190	Interconversion of serine and glycine
Chr6	39252901	T	C	0.400123	0.393	0.0442387	0.509931	BOB06G113330	Condensin II non structural maintenance of chromosomes subunit
Chr6	39572688	G	T	0.37956	0.4578	0.06893	0.502996	BOB06G114080	NA
Chr6	39592280	G	A	0.378959	0.4414	0.063786	0.501801	BOB06G114140	Belongs to the isocitrate and isopropylmalate dehydrogenases family
Chr6	39677971	T	G	0.391549	0.464	0.0534979	0.511099	BOB06G114430	Protein of unknown function (DUF775)
Chr6	39702155	C	G	0.385574	0.466	0.0452675	0.507005	BOB06G114470	receptor protein kinase TMK1
Chr6	39755944	A	C	0.38843	0.4352	0.0936214	0.508773	BOB06G114710	subtilase family
Chr6	40452413	A	G	0.381108	0.4053	0.0740741	0.500169	BOB06G116710	Protein PLASTID MOVEMENT IMPAIRED 2-like
Chr6	40582776	G	T	0.391014	0.4259	0.090535	0.510053	BOB06G116960	HEAT repeat-containing protein
Chr6	40585712	T	C	0.388686	0.3879	0.0823045	0.503715	BOB06G116970	FLX-like 2
Chr6	40586063	T	C	0.404816	0.43	0.0534979	0.518804	BOB06G116970	FLX-like 2
Chr6	40638314	A	T	0.378212	0.4064	0.0504115	0.496434	BOB06G117090	proteasome maturation factor UMP1 family protein
Chr6	41470139	G	C	0.368835	0.3632	0.0658436	0.482114	BOB06G119260	caffeoyl-CoA O-methyltransferase
Chr6	42680916	T	A	0.387882	0.4352	0.0668724	0.5077	BOB06G122420	Hypothetical methyltransferase
Chr6	42716556	C	G	0.380206	0.4126	0.0720165	0.500328	BOB06G122510	ubiE/COQ5 methyltransferase family
Chr6	42723815	G	A	0.457911	0.3992	0.06893	0.556208	BOB06G122520	NA
Chr6	42729383	A	G	0.432414	0.43	0.0668724	0.539036	BOB06G122530	NA
Chr6	42747369	T	C	0.387831	0.394	0.0802469	0.50388	BOB06G122580	agamous-like
Chr6	42747750	C	T	0.380845	0.4444	0.0740741	0.503548	BOB06G122580	agamous-like
Chr6	43393182	A	G	0.377433	0.4023	0.0997942	0.498785	BOB06G124180	NHL repeat-containing protein
Chr6	43527965	T	A	0.378899	0.4043	0.0936214	0.499707	BOB06G124540	Protein kinase domain
Chr6	43664248	G	A	0.388223	0.4414	0.06893	0.508366	BOB06G124870	F-box protein At1g70590-like
Chr6	43994501	G	C	0.40307	0.4455	0.0792181	0.518921	BOB06G125760	U-box domain-containing protein
Chr6	44038047	C	A	0.391771	0.4156	0.0864198	0.50967	BOB06G125890	auxin efflux carrier family protein
Chr6	45440639	A	G	0.380893	0.4465	0.0730453	0.503645	BOB06G129340	cytochrome P450
Chr6	45459355	C	G	0.382489	0.4527	0.0658436	0.504824	BOB06G129380	Sucrose-cleaving enzyme that provides UDP-glucose and fructose for various metabolic pathways
Chr6	45464086	C	T	0.384239	0.4259	0.0668724	0.50438	BOB06G129390	BEST Arabidopsis thaliana protein match is
Chr6	45482917	G	T	0.388573	0.4588	0.0606996	0.509054	BOB06G129420	Its function is described as protein serine threonine kinase activity, protein kinase activity, kinase activity, ATP binding
Chr6	45485196	A	G	0.378821	0.4383	0.0648148	0.501529	BOB06G129420	Its function is described as protein serine threonine kinase activity, protein kinase activity, kinase activity, ATP binding
Chr6	45627350	C	T	0.390205	0.3796	0.0987654	0.504837	BOB06G129820	Belongs to the multi antimicrobial extrusion (MATE) (TC 2.A.66.1) family
Chr6	45648076	C	A	0.406346	0.3776	0.0802469	0.515083	BOB06G129900	Pentatricopeptide repeat-containing protein
Chr6	45654248	C	G	0.38488	0.4187	0.100823	0.505637	BOB06G129910	Transducin family protein WD-40 repeat family
Chr6	45725149	C	T	0.38712	0.4455	0.095679	0.508116	BOB06G130090	Carbon catabolite repressor protein 4 homolog 5
Chr6	46214109	C	T	0.393826	0.3683	0.0565844	0.501444	BOB06G131370	Pathogenesis-related
Chr6	46818689	C	T	0.372524	0.3745	0.063786	0.487322	BOB06G132860	Prolyl endopeptidase-like
Chr6	48630245	G	A	0.375761	0.3642	0.06893	0.488019	BOB06G136920	WD repeat-containing protein
Chr6	48666498	G	A	0.370341	0.3519	0.0596708	0.479561	BOB06G137020	plasma membrane ATPase
Chr6	48668180	A	G	0.374492	0.3673	0.0658436	0.487411	BOB06G137020	plasma membrane ATPase
Chr7	290236	C	T	0.379481	0.465	0.0452675	0.502839	BOB07G000760	Belongs to the TRAFAC class myosin-kinesin ATPase superfamily. Kinesin family
Chr7	333921	C	G	0.383354	0.4064	0.0576132	0.50076	BOB07G000880	NA
Chr7	352001	T	C	0.394583	0.3971	0.0617284	0.507917	BOB07G000930	Belongs to the protein kinase superfamily. Ser Thr protein kinase family
Chr7	352472	A	T	0.414653	0.3992	0.0545267	0.522678	BOB07G000930	Belongs to the protein kinase superfamily. Ser Thr protein kinase family
Chr7	353321	C	A	0.383911	0.4084	0.0627572	0.501841	BOB07G000930	Belongs to the protein kinase superfamily. Ser Thr protein kinase family
Chr7	353981	G	A	0.386868	0.4527	0.0545267	0.50762	BOB07G000930	Belongs to the protein kinase superfamily. Ser Thr protein kinase family
Chr7	365078	A	G	0.377563	0.392	0.0699588	0.495171	BOB07G000960	transcription factor
Chr7	940016	T	C	0.388066	0.4455	0.0534979	0.508059	BOB07G002370	PI-PLC X domain-containing protein
Chr7	975149	C	T	0.38539	0.4033	0.0720165	0.502843	BOB07G002520	Multicopper oxidase
Chr7	975413	G	T	0.377503	0.4064	0.063786	0.496969	BOB07G002520	Multicopper oxidase
Chr7	976102	A	T	0.387765	0.4321	0.06893	0.507471	BOB07G002520	Multicopper oxidase
Chr7	976855	A	G	0.377325	0.4383	0.0668724	0.500565	BOB07G002520	Multicopper oxidase
Chr7	1089559	A	C	0.397274	0.4609	0.0421811	0.514863	BOB07G002810	Belongs to the major facilitator superfamily. Sugar transporter (TC 2.A.1.1) family
Chr7	1277844	T	C	0.40545	0.4331	0.0699588	0.520015	BOB07G003250	Cold shock
Chr7	1292450	C	A	0.386876	0.4012	0.0514403	0.502043	BOB07G003290	mid1-complementing activity
Chr7	1524156	A	T	0.385623	0.4033	0.0761317	0.503296	BOB07G003850	Belongs to the MIP aquaporin (TC 1.A.8) family
Chr7	1532476	C	T	0.382397	0.3899	0.0761317	0.498908	BOB07G003860	Occurs in almost all aerobically respiring organisms and serves to protect cells from the toxic effects of hydrogen peroxide
Chr7	1625400	A	G	0.402114	0.4053	0.0730453	0.515364	BOB07G004120	Transcriptional activator that specifically binds 5'- GATA-3' or 5'-GAT-3' motifs within gene promoters
Chr7	1864196	G	T	0.374477	0.3961	0.0627572	0.492994	BOB07G004910	Pollen-specific leucine-rich repeat extensin-like protein
Chr7	1865033	T	A	0.408517	0.3951	0.0555556	0.517538	BOB07G004910	Pollen-specific leucine-rich repeat extensin-like protein
Chr7	2058949	T	G	0.382421	0.4455	0.0751029	0.504689	BOB07G005360	Reversible hydration of carbon dioxide
Chr7	2138894	T	A	0.381567	0.3858	0.0730453	0.497307	BOB07G005520	F-box only protein
Chr7	2187369	G	A	0.404111	0.4311	0.0781893	0.519177	BOB07G005610	UDP-sulfoquinovose synthase
Chr7	2306394	G	A	0.379639	0.4053	0.0504115	0.497309	BOB07G005890	boron transporter
Chr7	2993294	C	T	0.383201	0.4156	0.063786	0.502348	BOB07G007550	AFG1-like ATPase
Chr7	2993656	T	A	0.382601	0.4136	0.0565844	0.501178	BOB07G007550	AFG1-like ATPase
Chr7	3265872	T	C	0.383955	0.4599	0.0473251	0.505758	BOB07G008140	helicase MAGATAMA 3
Chr7	3852505	G	C	0.372902	0.3611	0.0781893	0.4862	BOB07G009700	belongs to the protein kinase superfamily
Chr7	3890321	A	T	0.385625	0.4578	0.0709877	0.507105	BOB07G009800	NAC domain containing protein 74
Chr7	4076234	A	C	0.388386	0.4187	0.0401235	0.504952	BOB07G010300	sequence-specific DNA binding
Chr7	4627783	G	C	0.388573	0.4558	0.0668724	0.509054	BOB07G011810	NA
Chr7	4635888	G	T	0.384006	0.4547	0.0617284	0.50586	BOB07G011830	K homology RNA-binding domain
Chr7	4637052	A	G	0.372064	0.356	0.0524691	0.481042	BOB07G011830	K homology RNA-binding domain
Chr7	4659873	C	T	0.417844	0.4331	0.0627572	0.52863	BOB07G011880	chloroplast import apparatus
Chr7	4772210	G	A	0.391107	0.4486	0.0493827	0.510235	BOB07G012160	transcriptional
Chr7	4800899	A	G	0.402798	0.4434	0.0596708	0.518398	BOB07G012280	Dehydration-responsive element-binding protein
Chr7	4820918	C	T	0.381105	0.4681	0.0524691	0.504064	BOB07G012330	MADS-box protein
Chr7	5052434	C	A	0.38182	0.428	0.0823045	0.503503	BOB07G013040	Alpha beta hydrolase domain-containing protein 17B-like
Chr7	5053123	A	G	0.390553	0.429	0.0679012	0.509156	BOB07G013040	Alpha beta hydrolase domain-containing protein 17B-like
Chr7	5178593	T	C	0.385377	0.4331	0.0946502	0.506615	BOB07G013390	Protein of unknown function (DUF1682)
Chr7	5211561	A	G	0.386312	0.4362	0.0627572	0.506528	BOB07G013480	May be involved in modulation of pathogen defense and leaf cell death
Chr7	5222435	G	A	0.382088	0.4362	0.0761317	0.504033	BOB07G013510	3-oxo-Delta(4,5)-steroid 5-beta-reductase-like
Chr7	5222588	C	G	0.377581	0.4383	0.0771605	0.501073	BOB07G013510	3-oxo-Delta(4,5)-steroid 5-beta-reductase-like
Chr7	5529869	A	G	0.394459	0.4588	0.058642	0.513053	BOB07G014170	Cystine lyase CORI3-like
Chr7	5579791	C	A	0.386433	0.4012	0.0452675	0.501192	BOB07G014280	Cystine lyase CORI3-like
Chr7	5620773	A	G	0.404141	0.4136	0.06893	0.517518	BOB07G014350	NA
Chr7	5694643	C	G	0.384018	0.4568	0.058642	0.505882	BOB07G014540	TIR domain
Chr7	5725638	G	A	0.385767	0.427	0.0648148	0.505461	BOB07G014600	Encoded by
Chr7	5727441	G	A	0.38996	0.4444	0.0781893	0.509873	BOB07G014610	Belongs to the iron ascorbate-dependent oxidoreductase family
Chr7	5728623	T	C	0.418036	0.4352	0.06893	0.52899	BOB07G014620	F-box protein
Chr7	6266029	G	A	0.423557	0.4362	0.0802469	0.533068	BOB07G015880	NA
Chr7	7108476	T	G	0.397366	0.4486	0.0792181	0.515041	BOB07G018070	Allantoate
Chr7	7810967	G	A	0.392897	0.4414	0.0823045	0.511861	BOB07G019890	transcription factor
Chr7	7827774	C	A	0.391268	0.4516	0.0514403	0.510548	BOB07G019960	Retinal pigment epithelial membrane protein
Chr7	7935361	G	C	0.394378	0.4444	0.0771605	0.512894	BOB07G020200	Potassium channel
Chr7	8393330	C	A	0.382088	0.4362	0.0761317	0.504033	BOB07G021310	ribosomal protein
Chr7	9674757	A	T	0.390022	0.4403	0.0925926	0.509994	BOB07G024970	Serine threonine-protein kinase
Chr7	9676805	G	T	0.387124	0.4434	0.101852	0.508124	BOB07G024970	Serine threonine-protein kinase
Chr7	9677021	G	T	0.389553	0.4084	0.0833333	0.507211	BOB07G024970	Serine threonine-protein kinase
Chr7	9679013	G	A	0.386778	0.427	0.100823	0.507443	BOB07G024980	The proteasome is a multicatalytic proteinase complex which is characterized by its ability to cleave peptides with Arg, Phe, Tyr, Leu, and Glu adjacent to the leaving group at neutral or slightly basic pH
Chr7	9691073	T	C	0.400958	0.3981	0.0936214	0.514876	BOB07G025020	Belongs to the iron ascorbate-dependent oxidoreductase family
Chr7	9691505	G	A	0.386717	0.4249	0.101852	0.507324	BOB07G025020	Belongs to the iron ascorbate-dependent oxidoreductase family
Chr7	9699945	T	G	0.395754	0.4331	0.0925926	0.513734	BOB07G025050	Belongs to the TRAFAC class myosin-kinesin ATPase superfamily. Kinesin family
Chr7	9826149	G	C	0.377565	0.3961	0.0853909	0.497091	BOB07G025490	ZF-HD protein dimerisation region
Chr7	10101676	G	A	0.390091	0.4619	0.0648148	0.510129	BOB07G026230	3-phosphatase and dual-specificity protein phosphatase
Chr7	10160445	C	A	0.406728	0.4259	0.0781893	0.520745	BOB07G026340	Zinc finger protein AZF1-like
Chr7	10165804	C	G	0.379447	0.4239	0.0668724	0.500787	BOB07G026360	60s ribosomal protein
Chr7	10248732	A	T	0.392858	0.4455	0.0709877	0.511786	BOB07G026560	ABC transporter A family member
Chr7	10335054	A	G	0.378351	0.3858	0.0936214	0.496702	BOB07G026790	U-box domain-containing protein
Chr7	10335168	T	A	0.395243	0.3909	0.0843621	0.509177	BOB07G026790	U-box domain-containing protein
Chr7	10340954	C	A	0.383224	0.3909	0.0864198	0.500508	BOB07G026810	Small G protein family protein RhoGAP
Chr7	11099825	T	A	0.372805	0.3591	0.0524691	0.482432	BOB07G028560	belongs to the protein kinase superfamily
Chr7	12944042	G	A	0.394094	0.4331	0.0812757	0.512342	BOB07G033220	Belongs to the cyclin family
Chr7	12945936	C	A	0.387483	0.4043	0.0802469	0.505047	BOB07G033230	binding, transcription factor
Chr7	12949652	A	T	0.388243	0.4342	0.0843621	0.508406	BOB07G033230	binding, transcription factor
Chr7	12960177	G	A	0.378846	0.3807	0.06893	0.493912	BOB07G033250	mitochondrial Rho GTPase
Chr7	13082127	T	A	0.379916	0.4012	0.0627572	0.497847	BOB07G033680	glutathione synthetase
Chr7	13086524	G	A	0.384136	0.4588	0.0751029	0.506115	BOB07G033680	glutathione synthetase
Chr7	13147245	C	A	0.387124	0.4671	0.0545267	0.508124	BOB07G033830	Gibberellin receptor
Chr7	13159524	G	T	0.385632	0.4702	0.0493827	0.507119	BOB07G033870	Pentacotripeptide-repeat region of PRORP
Chr7	13161908	C	A	0.387288	0.429	0.0606996	0.506537	BOB07G033880	DNAJ heat shock N-terminal domain-containing protein
Chr7	13168217	G	C	0.394464	0.4475	0.0823045	0.513063	BOB07G033900	FRIGIDA-like protein
Chr7	13389570	C	T	0.380791	0.4506	0.058642	0.503442	BOB07G034500	anatomical structure morphogenesis
Chr7	13431989	C	T	0.391502	0.4424	0.0884774	0.511006	BOB07G034620	Ankyrin repeat domain-containing protein
Chr7	13480449	C	G	0.383642	0.4105	0.0833333	0.50321	BOB07G034770	Encoded by
Chr7	13628572	G	A	0.385582	0.4516	0.0751029	0.50702	BOB07G035100	at5g49360 (e 0.0) bxl1, atbxl1 bxl1 (beta-xylosidase 1)
Chr7	13940387	G	A	0.394486	0.4558	0.0740741	0.513106	BOB07G035890	SAM domain-containing protein
Chr7	13947809	T	C	0.375604	0.3817	0.0853909	0.493268	BOB07G035910	NA
Chr7	13949991	C	G	0.384038	0.4043	0.104938	0.503986	BOB07G035920	RING-type zinc-finger
Chr7	14038547	T	C	0.380188	0.4136	0.108025	0.502248	BOB07G036240	FAD dependent oxidoreductase
Chr7	14039042	G	T	0.382264	0.4321	0.0925926	0.50438	BOB07G036240	FAD dependent oxidoreductase
Chr7	14076186	G	A	0.398316	0.429	0.0812757	0.515076	BOB07G036360	NA
Chr7	14091028	C	T	0.389543	0.4239	0.095679	0.509058	BOB07G036400	NA
Chr7	14091149	C	T	0.38317	0.4146	0.102881	0.50421	BOB07G036400	NA
Chr7	14098835	T	C	0.397376	0.4383	0.102881	0.515062	BOB07G036420	This protein plays a role in synthesis of starch. It catalyzes the synthesis of the activated glycosyl donor, ADP- glucose from Glc-1-P and ATP
Chr7	14287312	T	G	0.388839	0.4084	0.102881	0.507682	BOB07G036990	Belongs to the TRAFAC class myosin-kinesin ATPase superfamily. Kinesin family
Chr7	14308417	G	C	0.392402	0.4156	0.106996	0.510898	BOB07G037040	Soul heme-binding family protein
Chr7	14327194	A	T	0.381934	0.428	0.0864198	0.503728	BOB07G037090	Belongs to the ABC transporter superfamily. ABCG family. PDR (TC 3.A.1.205) subfamily
Chr7	14328243	T	C	0.380737	0.4126	0.0833333	0.50137	BOB07G037090	Belongs to the ABC transporter superfamily. ABCG family. PDR (TC 3.A.1.205) subfamily
Chr7	14333259	A	G	0.388326	0.3652	0.0843621	0.499509	BOB07G037100	2,3-bisphosphoglycerate-independent phosphoglycerate mutase
Chr7	14420241	T	A	0.388159	0.427	0.0946502	0.508241	BOB07G037330	root meristem growth factor
Chr7	14732608	C	G	0.388605	0.4486	0.0884774	0.509117	BOB07G038080	Domain of unknown function (DUF3598)
Chr7	14734584	C	A	0.382553	0.4475	0.0823045	0.504951	BOB07G038090	Protein of unknown function (DUF1336)
Chr7	14982370	T	C	0.394073	0.4259	0.0946502	0.512301	BOB07G038700	ABC transporter B family member
Chr7	15692874	C	T	0.393018	0.4537	0.0740741	0.512098	BOB07G040600	Zinc finger CCCH domain-containing protein
Chr7	15693357	G	T	0.384135	0.4568	0.0781893	0.506114	BOB07G040600	Zinc finger CCCH domain-containing protein
Chr7	15760045	G	A	0.382534	0.4383	0.0987654	0.504913	BOB07G040780	Denticleless protein homolog
Chr7	16915114	G	C	0.384109	0.4506	0.0823045	0.506063	BOB07G044060	D-cysteine desulfhydrase 2
Chr7	16920932	A	T	0.387126	0.4547	0.0802469	0.508127	BOB07G044090	regulator of chromosome condensation (RCC1) family protein
Chr7	18611643	C	G	0.388083	0.393	0.0864198	0.504367	BOB07G048730	Phytosulfokine receptor
Chr7	18611871	A	C	0.400275	0.394	0.0884774	0.513576	BOB07G048730	Phytosulfokine receptor
Chr7	18677096	T	C	0.397554	0.4105	0.0925926	0.513607	BOB07G048920	Pentatricopeptide repeat-containing protein
Chr7	18750467	G	A	0.403815	0.4043	0.0802469	0.516899	BOB07G049080	zinc finger
Chr7	18816829	G	T	0.38809	0.429	0.0874486	0.508106	BOB07G049260	Belongs to the nonaspanin (TM9SF) (TC 9.A.2) family
Chr7	18864202	C	A	0.387096	0.4012	0.0792181	0.504295	BOB07G049370	nucleic acid binding transcription factor zinc ion binding
Chr7	18931487	A	G	0.404388	0.43	0.0977366	0.519708	BOB07G049530	Ribonuclease H protein
Chr7	18966943	T	C	0.412541	0.428	0.0833333	0.525099	BOB07G049610	Purple acid phosphatase
Chr7	18969108	T	A	0.385324	0.429	0.0997942	0.506512	BOB07G049620	Pentatricopeptide repeat-containing protein
Chr7	18969525	A	C	0.386748	0.4084	0.0884774	0.505485	BOB07G049620	Pentatricopeptide repeat-containing protein
Chr7	18997276	A	G	0.396727	0.4239	0.0864198	0.513804	BOB07G049660	Histidine kinase
Chr7	19070378	G	A	0.397554	0.4126	0.0884774	0.513607	BOB07G049890	Belongs to the protein kinase superfamily. Ser Thr protein kinase family
Chr7	19071719	G	A	0.387693	0.3981	0.0967078	0.505453	BOB07G049890	Belongs to the protein kinase superfamily. Ser Thr protein kinase family
Chr7	19072272	T	G	0.391618	0.4053	0.102881	0.509374	BOB07G049890	Belongs to the protein kinase superfamily. Ser Thr protein kinase family
Chr7	19100654	G	T	0.402612	0.4228	0.0915638	0.518041	BOB07G049930	PHD finger
Chr7	19147636	G	A	0.380753	0.3714	0.0915638	0.49574	BOB07G050010	E3 ubiquitin protein ligase RIE1
Chr7	19156524	C	A	0.388318	0.4064	0.144033	0.508554	BOB07G050030	Belongs to the protein kinase superfamily. Ser Thr protein kinase family
Chr7	19156740	G	C	0.388385	0.4064	0.148148	0.508686	BOB07G050030	Belongs to the protein kinase superfamily. Ser Thr protein kinase family
Chr7	19218391	A	G	0.39087	0.4084	0.0792181	0.507925	BOB07G050160	Ankyrin repeat-containing protein
Chr7	19370105	G	C	0.495817	0.3776	0.0679012	0.584261	BOB07G050620	alcohol dehydrogenase (NAD) activity
Chr7	19635694	G	A	0.385609	0.4115	0.0915638	0.505152	BOB07G051380	Poly(A) polymerase central domain
Chr7	19654400	A	G	0.377297	0.4352	0.0720165	0.500508	BOB07G051430	Belongs to the protein kinase superfamily. Ser Thr protein kinase family
Chr7	19873454	C	G	0.382239	0.4239	0.0596708	0.502381	BOB07G052100	heat shock
Chr7	19960676	T	C	0.383353	0.4228	0.0524691	0.502645	BOB07G052290	Mitochondrial biogenesis AIM24
Chr7	21645358	T	C	0.384049	0.4424	0.090535	0.505944	BOB07G056490	Guanylate-binding protein
Chr7	21645967	A	G	0.388493	0.4383	0.0925926	0.508897	BOB07G056490	Guanylate-binding protein
Chr7	21649538	C	A	0.386945	0.4383	0.0884774	0.507771	BOB07G056490	Guanylate-binding protein
Chr7	23067260	C	T	0.389493	0.428	0.0853909	0.50896	BOB07G060270	ATPCAP1, PCAP1 DREPP plasma membrane polypeptide family protein
Chr7	23089134	G	C	0.388113	0.4311	0.0843621	0.508152	BOB07G060320	This protein promotes the GTP-dependent binding of aminoacyl-tRNA to the A-site of ribosomes during protein biosynthesis
Chr7	23090091	T	C	0.375928	0.4331	0.0833333	0.499808	BOB07G060320	This protein promotes the GTP-dependent binding of aminoacyl-tRNA to the A-site of ribosomes during protein biosynthesis
Chr7	23094595	G	A	0.381934	0.427	0.0884774	0.503728	BOB07G060350	Belongs to the SNF7 family
Chr7	23095071	T	A	0.389796	0.4362	0.0833333	0.509553	BOB07G060350	Belongs to the SNF7 family
Chr7	23118383	A	G	0.384257	0.4043	0.0771605	0.502514	BOB07G060420	LSD1 zinc finger
Chr7	23820523	C	T	0.384936	0.4311	0.0781893	0.505747	BOB07G062260	Myb-like DNA-binding domain
Chr7	24144015	G	C	0.390036	0.4084	0.0946502	0.508148	BOB07G063230	Histone-lysine N-methyltransferase
Chr7	24393101	T	C	0.468873	0.3786	0.0967078	0.564123	BOB07G063830	ATPase activity, coupled to transmembrane movement of substances
Chr7	26080575	C	T	0.388268	0.4023	0.100823	0.506571	BOB07G068640	PI-PLC X domain-containing protein
Chr7	26326101	G	A	0.392176	0.4146	0.100823	0.510457	BOB07G069300	Natural resistance-associated macrophage protein
Chr7	26327153	T	A	0.38263	0.4496	0.0946502	0.505104	BOB07G069310	RING-type E3 ubiquitin transferase
Chr7	26610426	C	T	0.403413	0.4187	0.0771605	0.517841	BOB07G070020	Encoded by
Chr7	26624175	T	A	0.383402	0.4136	0.0720165	0.502741	BOB07G070050	U-box domain-containing protein 34-like
Chr7	26636215	C	T	0.394447	0.4496	0.0751029	0.51303	BOB07G070050	U-box domain-containing protein 34-like
Chr7	27196470	C	A	0.38809	0.4218	0.101852	0.508106	BOB07G071610	ferredoxin--NADP reductase, leaf isozyme 2
Chr7	31564715	G	A	0.461353	0.4115	0.0874486	0.559908	BOB07G083940	zinc finger
Chr7	31851736	A	G	0.375238	0.393	0.105967	0.496437	BOB07G084790	Component of the ribosome assembly machinery. Nuclear paralog of the ribosomal protein P0, it binds pre-60S subunits at an early stage of assembly in the nucleolus, and is replaced by P0 in cytoplasmic pre-60S subunits and mature 80S ribosomes
Chr7	31853456	A	G	0.378831	0.3714	0.106996	0.495743	BOB07G084800	clathrin assembly
Chr7	31924237	A	G	0.376919	0.3714	0.0833333	0.492055	BOB07G085030	Belongs to the protein kinase superfamily. Ser Thr protein kinase family
Chr7	31990557	T	C	0.391171	0.429	0.0915638	0.510361	BOB07G085200	DNA-binding domain in plant proteins such as APETALA2 and EREBPs
Chr7	32061156	G	C	0.441017	0.3992	0.0740741	0.543623	BOB07G085380	Very-long-chain 3-oxoacyl-CoA reductase-like protein At1g24470
Chr7	33830065	C	G	0.388599	0.4578	0.0679012	0.509105	BOB07G090030	BEST Arabidopsis thaliana protein match is Kinase-related
Chr7	33886355	G	C	0.388386	0.4023	0.0730453	0.504952	BOB07G090170	methyltransferase
Chr7	33887136	T	C	0.372816	0.3796	0.0565844	0.487882	BOB07G090170	methyltransferase
Chr7	36577760	T	A	0.369998	0.3549	0.0781893	0.482495	BOB07G097420	BEST Arabidopsis thaliana protein match is Cyclopropane-fatty-acyl-phospholipid synthase (TAIR
Chr7	41976662	T	C	0.390091	0.4414	0.105967	0.510129	BOB07G114680	Zinc-finger
Chr7	42100983	G	A	0.377668	0.4331	0.0915638	0.501246	BOB07G115060	zinc finger (CCCH-type) family protein
Chr7	42254971	T	A	0.422573	0.4074	0.0884774	0.531239	BOB07G115600	transposition, RNA-mediated
Chr7	42259454	A	G	0.408217	0.4198	0.0936214	0.521889	BOB07G115620	NA
Chr7	42263024	G	T	0.410882	0.4167	0.0936214	0.523608	BOB07G115640	NA
Chr7	42267492	T	G	0.404132	0.4228	0.095679	0.519217	BOB07G115670	NA
Chr7	42353068	T	C	0.408457	0.4228	0.0997942	0.522346	BOB07G115990	Glycine rich protein family
Chr7	42470507	T	G	0.389493	0.4218	0.0977366	0.50896	BOB07G116340	Oxidation resistance protein
Chr7	42484695	A	G	0.38637	0.4259	0.0853909	0.506642	BOB07G116420	proton gradient regulation 5
Chr7	48696216	G	T	0.402564	0.4239	0.0874486	0.51795	BOB07G129820	Belongs to the peroxisomal membrane protein PXMP2 4 family
Chr7	48869225	C	T	0.381758	0.4043	0.0884774	0.501439	BOB07G130370	3-ketoacyl-coa synthase
Chr7	49245606	T	G	0.39496	0.4023	0.0833333	0.510399	BOB07G131800	Auxin-responsive GH3 family protein
Chr7	49679481	A	G	0.379058	0.3858	0.0812757	0.496183	BOB07G133330	NA
Chr7	49710841	C	T	0.370213	0.3519	0.0720165	0.481094	BOB07G133390	ubiquitin-protein transferase activity
Chr7	49782206	G	T	0.386057	0.4156	0.095679	0.506028	BOB07G133570	peptidyl-prolyl cis-trans isomerase
Chr7	49800907	T	C	0.385613	0.4362	0.111111	0.507081	BOB07G133620	Belongs to the glycosyltransferase 8 family
Chr7	49801198	C	A	0.389519	0.4218	0.0987654	0.509009	BOB07G133620	Belongs to the glycosyltransferase 8 family
Chr7	49801300	A	G	0.390045	0.4372	0.101852	0.51004	BOB07G133620	Belongs to the glycosyltransferase 8 family
Chr7	49824556	G	A	0.38188	0.3673	0.0771605	0.49429	BOB07G133680	Pentatricopeptide repeat-containing protein
Chr7	49883633	C	T	0.378762	0.4156	0.108025	0.501412	BOB07G133890	NA
Chr7	49904166	T	C	0.391517	0.4362	0.102881	0.511035	BOB07G133960	NA
Chr7	49914802	A	G	0.411372	0.4249	0.104938	0.524537	BOB07G133980	Protein of unknown function (DUF1677)
Chr7	49943571	G	A	0.430428	0.3889	0.0658436	0.534006	BOB07G134120	Ribonuclease H protein
Chr7	49970612	C	A	0.377081	0.4002	0.0967078	0.498093	BOB07G134170	Belongs to the PI3 PI4-kinase family
Chr7	49973046	A	G	0.380568	0.3879	0.0997942	0.499117	BOB07G134170	Belongs to the PI3 PI4-kinase family
Chr7	49973160	G	A	0.379988	0.4177	0.0936214	0.501854	BOB07G134170	Belongs to the PI3 PI4-kinase family
Chr7	49973943	C	T	0.375472	0.3868	0.095679	0.494935	BOB07G134170	Belongs to the PI3 PI4-kinase family
Chr7	49976619	A	G	0.381222	0.3971	0.0925926	0.500392	BOB07G134170	Belongs to the PI3 PI4-kinase family
Chr7	50247163	T	C	0.442326	0.3704	0.06893	0.540846	BOB07G135130	NA
Chr7	50398991	G	A	0.380023	0.4177	0.0946502	0.501922	BOB07G135690	The coatomer is a cytosolic protein complex that binds to dilysine motifs and reversibly associates with Golgi non- clathrin-coated vesicles, which further mediate biosynthetic protein transport from the ER, via the Golgi up to the trans Golgi network. Coatomer complex is required for budding from Golgi membranes, and is essential for the retrograde Golgi-to-ER transport of dilysine-tagged protei…
Chr7	50401127	T	C	0.378103	0.393	0.100823	0.498143	BOB07G135690	The coatomer is a cytosolic protein complex that binds to dilysine motifs and reversibly associates with Golgi non- clathrin-coated vesicles, which further mediate biosynthetic protein transport from the ER, via the Golgi up to the trans Golgi network. Coatomer complex is required for budding from Golgi membranes, and is essential for the retrograde Golgi-to-ER transport of dilysine-tagged protei…
Chr7	50440343	C	G	0.385356	0.4012	0.105967	0.504657	BOB07G135790	LRR receptor-like serine threonine-protein kinase At2g16250
Chr7	50441304	G	C	0.383593	0.4218	0.103909	0.505044	BOB07G135790	LRR receptor-like serine threonine-protein kinase At2g16250
Chr7	50443456	G	C	0.382005	0.3992	0.103909	0.501924	BOB07G135790	LRR receptor-like serine threonine-protein kinase At2g16250
Chr7	50473644	G	C	0.377208	0.4156	0.108025	0.500332	BOB07G135930	BEST Arabidopsis thaliana protein match is
Chr7	50474058	G	T	0.37885	0.4064	0.0884774	0.49961	BOB07G135930	BEST Arabidopsis thaliana protein match is
Chr7	50548034	G	A	0.386063	0.3981	0.0946502	0.504151	BOB07G136100	Ribonuclease H protein
Chr7	50630752	T	A	0.379137	0.4084	0.090535	0.500176	BOB07G136340	3-oxo-5-alpha-steroid 4-dehydrogenase family protein
Chr7	50715373	C	T	0.373373	0.3796	0.0812757	0.490845	BOB07G136470	Glutamine phosphoribosylpyrophosphate amidotransferase
Chr7	50759000	G	A	0.380769	0.3889	0.0771605	0.497621	BOB07G136580	translocon-associated protein
Chr7	50777206	C	A	0.379572	0.4095	0.0987654	0.501033	BOB07G136620	Proteinaceous RNase P
Chr7	50857414	T	C	0.388268	0.4053	0.0946502	0.506571	BOB07G136830	Removal of H(2)O(2), oxidation of toxic reductants, biosynthesis and degradation of lignin, suberization, auxin catabolism, response to environmental stresses such as wounding, pathogen attack and oxidative stress
Chr7	50969279	C	G	0.385767	0.4012	0.116255	0.505461	BOB07G137270	beta-galactosidase
Chr7	50970164	A	G	0.377581	0.43	0.0936214	0.501073	BOB07G137270	beta-galactosidase
Chr7	50971470	T	A	0.380669	0.427	0.0997942	0.5032	BOB07G137270	beta-galactosidase
Chr7	51159998	C	T	0.414051	0.4352	0.0771605	0.526316	BOB07G137950	NA
Chr7	51170972	C	T	0.383994	0.4475	0.0751029	0.505836	BOB07G137990	SYF2 splicing factor
Chr7	51195594	A	G	0.385634	0.4516	0.0874486	0.507122	BOB07G138060	Belongs to the major facilitator superfamily. Sugar transporter (TC 2.A.1.1) family
Chr7	51311077	C	G	0.400249	0.4475	0.0833333	0.517022	BOB07G138390	NA
Chr7	51328905	G	A	0.392349	0.4208	0.0946502	0.510794	BOB07G138460	microtubule binding
Chr7	51431152	A	T	0.384018	0.4444	0.0833333	0.505882	BOB07G138780	attrn1,trn1
Chr7	52235836	C	G	0.384161	0.4239	0.06893	0.504226	BOB07G141310	reductase
Chr7	52236151	C	G	0.379692	0.4218	0.0771605	0.50127	BOB07G141310	reductase
Chr7	56861870	G	A	0.379594	0.4516	0.0895062	0.503064	BOB07G155280	Belongs to the class I-like SAM-binding methyltransferase superfamily. Protein arginine N- methyltransferase family
Chr7	57412294	T	C	0.438963	0.4372	0.0740741	0.543957	BOB07G157000	NA
Chr7	57416160	A	G	0.46027	0.427	0.0617284	0.559169	BOB07G157020	transposition, RNA-mediated
Chr7	57653116	G	A	0.38809	0.428	0.0895062	0.508106	BOB07G157790	Plant family of unknown function (DUF810)
Chr7	57654207	G	T	0.383769	0.4414	0.0730453	0.505391	BOB07G157790	Plant family of unknown function (DUF810)
Chr7	57654719	T	G	0.389831	0.4393	0.0792181	0.509621	BOB07G157790	Plant family of unknown function (DUF810)
Chr7	57802278	G	A	0.380752	0.4383	0.0812757	0.503365	BOB07G158230	Protein phosphatase 2C and cyclic nucleotide-binding kinase domain-containing
Chr7	57803457	T	A	0.389894	0.4434	0.0751029	0.509743	BOB07G158230	Protein phosphatase 2C and cyclic nucleotide-binding kinase domain-containing
Chr7	57970747	G	A	0.400221	0.4403	0.090535	0.516967	BOB07G158710	CLASP N terminal
Chr8	231705	G	T	0.374845	0.3971	0.0658436	0.493711	BOB08G000680	glycerol-3-phosphate acyltransferase
Chr8	232897	G	C	0.396976	0.4126	0.0740741	0.512496	BOB08G000690	Belongs to the cytochrome P450 family
Chr8	233020	T	C	0.40558	0.4105	0.0751029	0.518562	BOB08G000690	Belongs to the cytochrome P450 family
Chr8	280466	A	G	0.389553	0.4126	0.0751029	0.507211	BOB08G000790	protein heterodimerization activity
Chr8	413580	A	C	0.381118	0.466	0.0627572	0.504089	BOB08G001160	NA
Chr8	683546	G	T	0.385631	0.4465	0.095679	0.507115	BOB08G001790	Thioredoxin
Chr8	685258	A	G	0.382264	0.4372	0.0823045	0.50438	BOB08G001800	DTW
Chr8	771883	T	A	0.386972	0.4403	0.0864198	0.507824	BOB08G002030	belongs to the protein kinase superfamily
Chr8	816577	A	T	0.385324	0.4434	0.0709877	0.506512	BOB08G002130	translation initiation factor activity
Chr8	819704	A	G	0.375794	0.43	0.0843621	0.499541	BOB08G002130	translation initiation factor activity
Chr8	821138	T	G	0.38637	0.4259	0.0853909	0.506642	BOB08G002140	Eukaryotic translation initiation factor 2 subunit gamma-like
Chr8	953976	T	C	0.369572	0.3488	0.0596708	0.47812	BOB08G002420	Aux IAA proteins are short-lived transcriptional factors that function as repressors of early auxin response genes at low auxin concentrations
Chr8	968782	T	C	0.398789	0.4383	0.095679	0.51599	BOB08G002460	monooxygenase
Chr8	969374	A	T	0.386931	0.4352	0.0936214	0.507743	BOB08G002460	monooxygenase
Chr8	974402	G	A	0.395674	0.4002	0.102881	0.511772	BOB08G002480	NADH dehydrogenase ubiquinone 1 alpha subcomplex subunit
Chr8	978471	C	A	0.382053	0.4012	0.100823	0.502017	BOB08G002510	NA
Chr8	982825	C	G	0.385608	0.4455	0.0915638	0.507071	BOB08G002520	Pectate lyase
Chr8	1068916	G	C	0.38155	0.4074	0.0781893	0.501033	BOB08G002690	Belongs to the universal ribosomal protein uL6 family
Chr8	1077160	G	T	0.387744	0.4064	0.0812757	0.505552	BOB08G002710	Glutamate-gated receptor that probably acts as non- selective cation channel
Chr8	1264195	T	C	0.391863	0.4074	0.0709877	0.508024	BOB08G003230	protein domain specific binding
Chr8	1267376	T	A	0.394803	0.4023	0.0802469	0.510095	BOB08G003240	Belongs to the peptidase A1 family
Chr8	1295546	G	A	0.382751	0.3879	0.0853909	0.499593	BOB08G003300	isoform X1
Chr8	1385816	G	A	0.401639	0.4434	0.0823045	0.517928	BOB08G003510	Caspase domain
Chr8	1484588	G	A	0.386556	0.3951	0.0823045	0.503252	BOB08G003810	isomerase
Chr8	1485101	C	T	0.386189	0.4218	0.0874486	0.506287	BOB08G003810	isomerase
Chr8	1665284	A	G	0.379598	0.4527	0.090535	0.503072	BOB08G004360	Belongs to the GRAS family
Chr8	1688991	A	C	0.386758	0.4393	0.0751029	0.507404	BOB08G004420	leucine-rich repeat protein kinase
Chr8	2110696	C	T	0.391319	0.4311	0.095679	0.510648	BOB08G005270	Belongs to the major facilitator superfamily. Sugar transporter (TC 2.A.1.1) family
Chr8	2265585	A	G	0.400184	0.428	0.110082	0.516895	BOB08G005720	60S ribosomal Protein
Chr8	2269262	T	A	0.383411	0.429	0.0823045	0.504685	BOB08G005730	Serine threonine-protein kinase
Chr8	2272394	G	A	0.37895	0.3693	0.0751029	0.49229	BOB08G005740	Belongs to the class-I aminoacyl-tRNA synthetase family
Chr8	2276732	A	G	0.378119	0.3755	0.0895062	0.494366	BOB08G005750	elongation factor
Chr8	2277720	G	A	0.385046	0.3837	0.0823045	0.500341	BOB08G005760	NA
Chr8	2302448	G	T	0.38264	0.3858	0.0668724	0.497539	BOB08G005840	tRNA pseudouridine
Chr8	2303592	G	C	0.391517	0.4496	0.0761317	0.511035	BOB08G005840	tRNA pseudouridine
Chr8	2442489	T	G	0.377688	0.3992	0.0812757	0.497332	BOB08G006120	Biotin carboxylase
Chr8	2444483	T	C	0.427399	0.4311	0.0781893	0.535659	BOB08G006120	Biotin carboxylase
Chr8	2445134	G	T	0.389614	0.4249	0.0967078	0.509196	BOB08G006120	Biotin carboxylase
Chr8	2445512	C	T	0.379432	0.4372	0.0967078	0.502741	BOB08G006120	Biotin carboxylase
Chr8	2498347	T	G	0.393024	0.4537	0.0761317	0.512109	BOB08G006340	serine threonine-protein phosphatase
Chr8	2677847	C	G	0.384634	0.4311	0.0679012	0.505155	BOB08G006780	BSD domain
Chr8	2794427	T	A	0.386901	0.4362	0.0895062	0.507684	BOB08G007100	Leucine rich repeat
Chr8	2853192	A	C	0.402833	0.4475	0.0534979	0.518466	BOB08G007230	May be involved in modulation of pathogen defense and leaf cell death
Chr8	2865414	A	T	0.38704	0.4506	0.0720165	0.507957	BOB08G007270	G-type lectin S-receptor-like serine threonine-protein kinase
Chr8	3219376	G	A	0.379441	0.3951	0.0473251	0.495057	BOB08G008030	Protein of unknown function (DUF1442)
Chr8	3578354	T	C	0.379503	0.4537	0.0699588	0.502881	BOB08G008870	Removes the N-terminal methionine from nascent proteins. The N-terminal methionine is often cleaved when the second residue in the primary sequence is small and uncharged (Met-Ala-, Cys, Gly, Pro, Ser, Thr, or Val)
Chr8	3578560	C	T	0.38364	0.4486	0.0524691	0.505137	BOB08G008870	Removes the N-terminal methionine from nascent proteins. The N-terminal methionine is often cleaved when the second residue in the primary sequence is small and uncharged (Met-Ala-, Cys, Gly, Pro, Ser, Thr, or Val)
Chr8	3905167	C	T	0.39192	0.3879	0.0853909	0.506344	BOB08G009640	Belongs to the iron ascorbate-dependent oxidoreductase family
Chr8	3912555	G	C	0.415465	0.4012	0.0936214	0.525757	BOB08G009660	Belongs to the mitochondrial carrier (TC 2.A.29) family
Chr8	3917292	C	G	0.384939	0.4033	0.0925926	0.503842	BOB08G009680	KH domain-containing protein
Chr8	3921206	T	C	0.377575	0.4053	0.0967078	0.499066	BOB08G009690	Ring finger
Chr8	3925791	C	T	0.383438	0.4239	0.0936214	0.504739	BOB08G009720	ribosomal protein L18
Chr8	4531124	T	A	0.385557	0.4516	0.0720165	0.506971	BOB08G011410	ribosomal protein
Chr8	5791274	T	C	0.384059	0.4434	0.0895062	0.505963	BOB08G014480	At1g01500-like
Chr8	5953196	A	T	0.388282	0.4383	0.0781893	0.508482	BOB08G014910	decarboxylase
Chr8	6035121	T	A	0.38764	0.4198	0.0895062	0.507225	BOB08G015110	Belongs to the glycosyl hydrolase 5 (cellulase A) family
Chr8	6035271	C	T	0.391268	0.4342	0.0864198	0.510548	BOB08G015110	Belongs to the glycosyl hydrolase 5 (cellulase A) family
Chr8	6081939	C	G	0.388385	0.4516	0.0576132	0.508686	BOB08G015260	C2 domain
Chr8	7993815	A	T	0.383867	0.4146	0.0802469	0.503652	BOB08G019730	ER membrane protein complex subunit 7 homolog
Chr8	7997940	C	T	0.382372	0.4136	0.0833333	0.502643	BOB08G019740	BEST Arabidopsis thaliana protein match is
Chr8	8001476	A	T	0.386564	0.4084	0.0843621	0.505125	BOB08G019740	BEST Arabidopsis thaliana protein match is
Chr8	8001704	A	G	0.38373	0.394	0.0884774	0.50149	BOB08G019740	BEST Arabidopsis thaliana protein match is
Chr8	9238554	C	T	0.377889	0.427	0.0606996	0.499685	BOB08G023110	RAB6A-GEF complex partner protein 1-like
Chr8	9239283	T	G	0.383749	0.4393	0.0761317	0.505351	BOB08G023110	RAB6A-GEF complex partner protein 1-like
Chr8	9407146	A	G	0.403027	0.4547	0.0545267	0.518839	BOB08G023630	RING-like zinc finger
Chr8	9516771	G	A	0.380117	0.4023	0.063786	0.498239	BOB08G023980	F-box protein At1g67390
Chr8	9525109	G	T	0.391419	0.4434	0.0781893	0.510845	BOB08G024010	transketolase activity
Chr8	9534767	C	T	0.381162	0.429	0.0606996	0.502206	BOB08G024040	pectinesterase pectinesterase inhibitor 36
Chr8	9572862	G	C	0.38799	0.4342	0.0730453	0.507911	BOB08G024120	Spindle and kinetochore-associated protein 1
Chr8	10056380	T	A	0.38439	0.4177	0.0874486	0.504677	BOB08G025380	phosphoinositide phosphatase SAC9
Chr8	10153342	A	G	0.389359	0.4403	0.0555556	0.508698	BOB08G025640	Flowering time control protein
Chr8	10253604	C	A	0.382244	0.4414	0.0730453	0.50434	BOB08G025870	endonuclease activity
Chr8	10256627	G	T	0.379046	0.3765	0.0617284	0.492472	BOB08G025880	Pam16
Chr8	10257179	A	G	0.379309	0.4444	0.0740741	0.502496	BOB08G025880	Pam16
Chr8	10333745	C	G	0.381906	0.4239	0.0936214	0.503673	BOB08G026030	ABC transporter transmembrane region
Chr8	10337719	T	A	0.388282	0.4342	0.0864198	0.508482	BOB08G026030	ABC transporter transmembrane region
Chr8	10425456	G	A	0.38895	0.4074	0.0730453	0.506042	BOB08G026210	Agamous-like MADS-box protein
Chr8	10447731	G	T	0.424416	0.392	0.0709877	0.530168	BOB08G026230	citrate synthase
Chr8	10877230	G	T	0.381101	0.4506	0.0864198	0.504056	BOB08G027400	peptidase
Chr8	10878754	A	C	0.378985	0.43	0.0874486	0.501853	BOB08G027400	peptidase
Chr8	10995531	G	A	0.388962	0.3755	0.0709877	0.500713	BOB08G027660	Aspartate glutamate uridylate kinase family protein
Chr8	11002819	A	G	0.377955	0.3745	0.0895062	0.494049	BOB08G027690	guanylate kinase
Chr8	11061217	A	G	0.400174	0.4383	0.0884774	0.516878	BOB08G027830	NA
Chr8	11795822	T	C	0.380547	0.3992	0.0534979	0.497191	BOB08G029710	Myosin heavy chain-related
Chr8	11812407	T	A	0.400441	0.4023	0.0751029	0.513892	BOB08G029750	CONTAINS InterPro DOMAIN s Thioredoxin fold (InterPro IPR012335), Thioredoxin, core (InterPro IPR015467), Thioredoxin domain (InterPro IPR013766), Thioredoxin, conserved site (InterPro IPR017937), Thioredoxin-like subdomain (InterPro IPR006662), Thioredoxin-like (InterPro IPR017936), Thioredoxin-like fold (InterPro IPR012336)
Chr8	11848975	G	T	0.386513	0.3755	0.0606996	0.497812	BOB08G029830	Destroys radicals which are normally produced within the cells and which are toxic to biological systems
Chr8	11860670	G	A	0.377688	0.3992	0.0812757	0.497332	BOB08G029860	Nucleotidyltransferase domain
Chr8	11926398	C	T	0.383997	0.3796	0.058642	0.496542	BOB08G030080	NA
Chr8	12898802	A	C	0.385596	0.4393	0.101852	0.507048	BOB08G032420	Rubisco LSMT substrate-binding
Chr8	13054611	A	T	0.393018	0.4414	0.0987654	0.512098	BOB08G032860	phosphatase 2C
Chr8	13054764	A	G	0.376462	0.3776	0.0843621	0.493038	BOB08G032860	phosphatase 2C
Chr8	13064032	T	A	0.385836	0.393	0.0751029	0.50186	BOB08G032890	Ypt Rab-GAP domain of gyp1p superfamily protein
Chr8	13067168	G	A	0.375115	0.3632	0.0648148	0.486793	BOB08G032890	Ypt Rab-GAP domain of gyp1p superfamily protein
Chr8	13069957	C	A	0.389311	0.4053	0.0843621	0.506742	BOB08G032900	Phosphoribosylformylglycinamidine cyclo-ligase
Chr8	13156467	G	A	0.399592	0.4126	0.0668724	0.513998	BOB08G033130	The light-harvesting complex (LHC) functions as a light receptor, it captures and delivers excitation energy to photosystems with which it is closely associated
Chr8	13746526	A	G	0.398384	0.4403	0.0617284	0.515208	BOB08G034510	expressed protein
Chr8	13795926	C	T	0.377802	0.4208	0.0709877	0.499514	BOB08G034670	Protein NRT1 PTR FAMILY
Chr8	13867067	G	T	0.387435	0.4249	0.0730453	0.506825	BOB08G034880	cytoskeleton organization
Chr8	14376259	A	C	0.387074	0.4558	0.0658436	0.508025	BOB08G036490	fructose-bisphosphate aldolase
Chr8	14596595	A	T	0.385401	0.3879	0.058642	0.499217	BOB08G037080	NA
Chr8	14621981	A	T	0.380826	0.4156	0.0792181	0.501546	BOB08G037150	Alpha beta hydrolase domain-containing protein
Chr8	14927553	A	C	0.386862	0.4095	0.058642	0.503842	BOB08G038010	mRNA cap guanine-N7 methyltransferase
Chr8	14935302	G	T	0.383438	0.4311	0.0792181	0.504739	BOB08G038030	WD40 repeats
Chr8	14942746	T	C	0.385972	0.3879	0.0874486	0.502123	BOB08G038060	mRNA-binding protein involved in proper cytoplasmic distribution of mitochondria
Chr8	14943685	C	T	0.382601	0.3981	0.0874486	0.501178	BOB08G038060	mRNA-binding protein involved in proper cytoplasmic distribution of mitochondria
Chr8	14945861	T	C	0.379929	0.3796	0.0843621	0.495997	BOB08G038060	mRNA-binding protein involved in proper cytoplasmic distribution of mitochondria
Chr8	14980548	C	T	0.387058	0.429	0.117284	0.507993	BOB08G038170	Nucleotide exchange factor Fes1
Chr8	15102959	T	C	0.380842	0.393	0.0699588	0.497762	BOB08G038440	sulfate transporter
Chr8	15252871	T	C	0.392884	0.4372	0.0895062	0.511837	BOB08G038710	(with no lysine (k) kinase 5)
Chr8	15319264	A	G	0.374176	0.3724	0.0524691	0.486809	BOB08G038870	Glutamate-gated receptor that probably acts as non- selective cation channel
Chr8	15326301	A	G	0.388369	0.4331	0.0936214	0.508654	BOB08G038890	Phosphoinositide phosphatase
Chr8	15334840	A	G	0.397184	0.4321	0.0925926	0.514689	BOB08G038910	strictosidine synthase
Chr8	15340828	T	C	0.386057	0.4146	0.0977366	0.506028	BOB08G038930	Arabidopsis protein of unknown function
Chr8	15345361	T	A	0.389311	0.4198	0.0555556	0.506742	BOB08G038940	Belongs to the DHHC palmitoyltransferase family
Chr8	15477426	T	C	0.387114	0.4547	0.0751029	0.508103	BOB08G039210	NA
Chr8	15481184	C	T	0.388599	0.4496	0.0843621	0.509105	BOB08G039220	Zinc finger CCCH domain-containing protein
Chr8	15485084	G	C	0.400144	0.4403	0.0812757	0.516819	BOB08G039220	Zinc finger CCCH domain-containing protein
Chr8	16094955	C	T	0.39301	0.4619	0.0555556	0.512083	BOB08G040930	CDPK-related kinase
Chr8	16118611	T	C	0.392897	0.4547	0.0555556	0.511861	BOB08G040980	Elongation factor
Chr8	16136362	G	T	0.385527	0.427	0.058642	0.504991	BOB08G041050	DOF zinc finger protein
Chr8	16187991	G	A	0.388982	0.4208	0.0823045	0.507962	BOB08G041180	NA
Chr8	16194609	A	T	0.394749	0.4074	0.06893	0.509992	BOB08G041190	Protein of unknown function (DUF1685)
Chr8	16219696	C	G	0.396668	0.3981	0.06893	0.510153	BOB08G041280	NA
Chr8	16285895	A	G	0.384635	0.3971	0.0720165	0.501382	BOB08G041450	acetyltransferase At3g50280-like
Chr8	16472721	A	G	0.393015	0.4547	0.0709877	0.512091	BOB08G041920	RNA polymerase II transcription regulator recruiting activity
Chr8	16479549	A	T	0.392349	0.4372	0.0617284	0.510794	BOB08G041940	Belongs to the peptidase A1 family
Chr8	16480779	C	T	0.380086	0.3807	0.0843621	0.496302	BOB08G041940	Belongs to the peptidase A1 family
Chr8	16493764	C	T	0.405137	0.3693	0.0648148	0.511268	BOB08G042000	casein kinase ii
Chr8	16533421	T	G	0.377433	0.4177	0.06893	0.498785	BOB08G042110	Belongs to the serpin family
Chr8	17466345	G	T	0.398362	0.4249	0.0915638	0.515165	BOB08G044400	RNA polymerase III subunit RPC82 family protein
Chr8	17468759	C	A	0.398592	0.4342	0.0853909	0.515609	BOB08G044410	AMP-dependent synthetase and ligase family protein
Chr8	17469295	A	G	0.376703	0.4023	0.0853909	0.497348	BOB08G044410	AMP-dependent synthetase and ligase family protein
Chr8	17469647	T	C	0.377747	0.4414	0.0792181	0.501403	BOB08G044410	AMP-dependent synthetase and ligase family protein
Chr8	17469966	T	G	0.377889	0.4084	0.0977366	0.499685	BOB08G044410	AMP-dependent synthetase and ligase family protein
Chr8	17501443	A	G	0.388525	0.4455	0.0812757	0.508959	BOB08G044540	Arabidopsis thaliana protein
Chr8	17549034	A	C	0.385041	0.4383	0.0679012	0.505955	BOB08G044690	F-box LRR-repeat protein At3g48880-like
Chr8	19344567	G	A	0.389721	0.4486	0.0545267	0.509405	BOB08G049610	Protein NRT1 PTR FAMILY
Chr8	19344786	A	C	0.389736	0.4228	0.058642	0.507566	BOB08G049610	Protein NRT1 PTR FAMILY
Chr8	19739980	G	T	0.388611	0.4475	0.0936214	0.509129	BOB08G050860	Protein disulfide isomerase-like 1-1
Chr8	20617408	G	A	0.379091	0.4177	0.0709877	0.500084	BOB08G053360	Belongs to the 'GDSL' lipolytic enzyme family
Chr8	20617525	T	A	0.37885	0.4156	0.0699588	0.49961	BOB08G053360	Belongs to the 'GDSL' lipolytic enzyme family
Chr8	21577971	T	A	0.379183	0.4033	0.101852	0.500266	BOB08G056110	protease inhibitor seed storage lipid transfer protein (LTP) family protein
Chr8	21795112	G	C	0.373476	0.3765	0.0699588	0.489153	BOB08G056670	U-box domain-containing protein
Chr8	21799106	G	T	0.376088	0.3714	0.0740741	0.490459	BOB08G056690	Telomere repeat-binding factor
Chr8	21863020	T	G	0.385922	0.3591	0.0720165	0.494987	BOB08G056890	Alpha/beta hydrolase family
Chr8	22046782	G	A	0.384144	0.4053	0.0730453	0.502294	BOB08G057420	cytochrome P450
Chr8	22101199	A	T	0.386985	0.4547	0.058642	0.507849	BOB08G057580	Contains the following InterPro domains UspA (InterPro IPR006016), Serine threonine-protein kinase domain (InterPro IPR002290), Serine-threonine tyrosine-protein kinase (InterPro IPR001245), Serine threonine-protein kinase, active site (InterPro IPR008271), Protein kinase-like domain (InterPro IPR011009), Rossmann-like alpha beta alpha sandwich fold (InterPro IPR014729), Protein kinase, catalytic…
Chr8	22535324	G	T	0.402588	0.4352	0.0658436	0.517996	BOB08G058820	Belongs to the nonaspanin (TM9SF) (TC 9.A.2) family
Chr8	22539781	C	T	0.389908	0.4434	0.0761317	0.509772	BOB08G058830	splicing factor 3A subunit 1
Chr8	23191851	C	T	0.371712	0.3591	0.0709877	0.483935	BOB08G060640	NA
Chr8	23328363	A	C	0.378375	0.3519	0.0740741	0.487671	BOB08G061060	Calcium-dependent protein kinase
Chr8	23633978	G	A	0.384477	0.4002	0.0895062	0.502942	BOB08G061880	Mannosyltransferase involved in glycosylphosphatidylinositol-anchor biosynthesis
Chr8	23644411	T	C	0.377019	0.357	0.0802469	0.48862	BOB08G061900	2-oxoacid dehydrogenases acyltransferase (catalytic domain)
Chr8	23649066	C	A	0.384349	0.3776	0.0853909	0.499002	BOB08G061910	Converts the prephenate produced from the shikimate- chorismate pathway into phenylalanine
Chr8	23649239	T	G	0.376427	0.3817	0.0967078	0.494869	BOB08G061910	Converts the prephenate produced from the shikimate- chorismate pathway into phenylalanine
Chr8	23650329	C	A	0.378686	0.3848	0.100823	0.497356	BOB08G061910	Converts the prephenate produced from the shikimate- chorismate pathway into phenylalanine
Chr8	23650529	C	G	0.383158	0.3858	0.095679	0.500381	BOB08G061910	Converts the prephenate produced from the shikimate- chorismate pathway into phenylalanine
Chr8	23654077	T	A	0.382147	0.4033	0.0987654	0.502202	BOB08G061920	Belongs to the glycosyl hydrolase 17 family
Chr8	23662826	C	A	0.38307	0.43	0.06893	0.504015	BOB08G061940	Dehydrodolichyl diphosphate syntase complex subunit NUS1-like
Chr8	24303283	A	G	0.39125	0.43	0.0936214	0.510513	BOB08G063780	Alpha-glucan water dikinase
Chr8	24550379	T	A	0.380753	0.3909	0.0967078	0.499477	BOB08G064320	exocyst complex component
Chr8	24727923	A	C	0.395172	0.4239	0.0833333	0.512606	BOB08G064790	Belongs to the class-IV pyridoxal-phosphate-dependent aminotransferase family
Chr8	24753546	C	A	0.386959	0.4352	0.095679	0.507798	BOB08G064850	Putative serine esterase (DUF676)
Chr8	24768673	C	T	0.388385	0.4424	0.0761317	0.508686	BOB08G064890	Belongs to the protein kinase superfamily. Ser Thr protein kinase family
Chr8	24768955	G	A	0.38408	0.4198	0.0751029	0.504067	BOB08G064890	Belongs to the protein kinase superfamily. Ser Thr protein kinase family
Chr8	25146523	A	T	0.41115	0.4342	0.0709877	0.524116	BOB08G066130	ATP-citrate synthase alpha chain protein
Chr8	25150280	C	G	0.383545	0.394	0.0853909	0.50113	BOB08G066140	Catalyzes the rate-limiting step of the oxidative pentose-phosphate pathway, which represents a route for the dissimilation of carbohydrates besides glycolysis
Chr8	25150436	C	T	0.384097	0.4424	0.0967078	0.506039	BOB08G066140	Catalyzes the rate-limiting step of the oxidative pentose-phosphate pathway, which represents a route for the dissimilation of carbohydrates besides glycolysis
Chr8	25263428	C	A	0.393028	0.4403	0.106996	0.512117	BOB08G066450	Aminopeptidase P, N-terminal domain
Chr8	25288959	G	A	0.398822	0.4331	0.116255	0.516054	BOB08G066570	protein heterodimerization activity
Chr8	25413073	T	G	0.443053	0.3467	0.0565844	0.536217	BOB08G066850	NA
Chr8	26096003	G	C	0.39286	0.3817	0.113169	0.508146	BOB08G068940	Belongs to the protein kinase superfamily. Ser Thr protein kinase family
Chr8	26195756	C	T	0.390116	0.4126	0.0884774	0.508305	BOB08G069180	Serine threonine-protein phosphatase
Chr8	28455813	C	T	0.392607	0.4105	0.0802469	0.50946	BOB08G075480	DNA-binding family
Chr8	28794949	A	C	0.382613	0.4486	0.0895062	0.50507	BOB08G076510	glycerol-3-phosphate transporter
Chr8	29075422	T	G	0.384316	0.4321	0.0565844	0.504531	BOB08G077350	DNA mismatch repair protein
Chr8	29494765	T	G	0.444636	0.3807	0.0627572	0.543681	BOB08G078470	ABC transporter
Chr8	33201092	T	G	0.380123	0.4259	0.0812757	0.502121	BOB08G088900	Belongs to the cytochrome P450 family
Chr8	34077048	G	A	0.377581	0.4352	0.0833333	0.501073	BOB08G091280	methyl-cpg-binding
Chr8	34184781	T	G	0.442201	0.4126	0.0833333	0.545753	BOB08G091580	transposition, RNA-mediated
Chr8	34475971	C	T	0.384761	0.427	0.0802469	0.505404	BOB08G092400	PQQ-like domain
Chr8	34483866	A	G	0.44508	0.4352	0.0668724	0.548287	BOB08G092410	5'-3' exoribonuclease activity
Chr8	34643547	G	A	0.380892	0.3652	0.0874486	0.494194	BOB08G092940	Belongs to the MIP aquaporin (TC 1.A.8) family
Chr8	34662797	A	T	0.426203	0.3673	0.0699588	0.527763	BOB08G092990	GHMP kinase family protein
Chr8	34669393	T	C	0.383578	0.3827	0.0853909	0.499342	BOB08G093000	Belongs to the DEAD box helicase family
Chr8	34695174	C	T	0.3907	0.3765	0.090535	0.504014	BOB08G093070	Phosphoribulokinase
Chr8	34695450	C	G	0.3737	0.3796	0.0853909	0.49148	BOB08G093070	Phosphoribulokinase
Chr8	35011698	T	C	0.389755	0.3663	0.0812757	0.500492	BOB08G093820	Belongs to the glycosyl hydrolase 1 family
Chr8	35016097	T	C	0.393815	0.356	0.0967078	0.503067	BOB08G093830	protease
Chr8	35149510	G	A	0.386256	0.3714	0.0833333	0.499072	BOB08G094380	PHD zinc finger
Chr8	35208898	G	A	0.46154	0.3817	0.0596708	0.556893	BOB08G094600	Ulp1 protease family, C-terminal catalytic domain
Chr8	35313391	C	T	0.379046	0.3673	0.0802469	0.492472	BOB08G094880	Transcription initiation factor TFIID subunit
Chr8	35317089	G	A	0.383141	0.3632	0.0823045	0.494917	BOB08G094880	Transcription initiation factor TFIID subunit
Chr8	35317977	A	G	0.3716	0.3529	0.0823045	0.483723	BOB08G094880	Transcription initiation factor TFIID subunit
Chr8	35381241	C	T	0.438229	0.3724	0.0462963	0.536112	BOB08G095170	NA
Chr8	35538795	C	T	0.468106	0.357	0.0462963	0.557873	BOB08G095750	NA
Chr8	35556269	A	G	0.477529	0.357	0.0648148	0.567034	BOB08G095790	NA
Chr8	35800874	G	A	0.383158	0.3786	0.110082	0.500381	BOB08G096570	Ribosomal protein-like protein
Chr8	36250852	G	A	0.380411	0.3745	0.0812757	0.495084	BOB08G098180	Belongs to the multi antimicrobial extrusion (MATE) (TC 2.A.66.1) family
Chr8	36265575	G	A	0.377619	0.3765	0.0812757	0.493401	BOB08G098210	(E 0.0) dehydration-responsive family protein
Chr8	36301593	A	C	0.384589	0.3621	0.0833333	0.49591	BOB08G098350	Transmembrane protein 120 homolog
Chr8	37022757	C	A	0.390486	0.4177	0.0884774	0.509024	BOB08G100690	disease resistance protein
Chr8	37117869	A	G	0.401932	0.4074	0.0987654	0.516738	BOB08G101060	NA
Chr8	37235847	T	C	0.406621	0.4208	0.0843621	0.520542	BOB08G101550	NA
Chr8	50780855	A	C	0.387366	0.3683	0.0679012	0.497699	BOB08G138310	Ras-related protein
Chr8	50781052	T	C	0.373307	0.3601	0.06893	0.485158	BOB08G138310	Ras-related protein
Chr8	51321227	G	A	0.383941	0.4475	0.0709877	0.50573	BOB08G139920	U5 small nuclear ribonucleoprotein
Chr8	51888371	G	T	0.373329	0.3961	0.06893	0.49269	BOB08G141510	Transcription initiation factor
Chr8	51938318	A	G	0.387882	0.4362	0.0648148	0.5077	BOB08G141670	ankyrin repeat
Chr8	51979634	T	C	0.387854	0.4156	0.104938	0.507644	BOB08G141800	Involved in the biogenesis of the 60S ribosomal subunit
Chr8	51980282	T	G	0.384963	0.4187	0.103909	0.505801	BOB08G141800	Involved in the biogenesis of the 60S ribosomal subunit
Chr8	51980792	T	C	0.386901	0.4331	0.095679	0.507684	BOB08G141800	Involved in the biogenesis of the 60S ribosomal subunit
Chr8	52107996	C	T	0.382489	0.4084	0.154321	0.504824	BOB08G142120	NADH dehydrogenase ubiquinone 1 alpha subcomplex subunit
Chr8	52116899	C	T	0.384114	0.4558	0.0730453	0.506073	BOB08G142130	Belongs to the TRAFAC class myosin-kinesin ATPase superfamily. Myosin family
Chr8	52124909	C	T	0.382523	0.4516	0.0709877	0.504893	BOB08G142150	generation of catalytic spliceosome for first transesterification step
Chr8	52149358	T	A	0.382715	0.4012	0.0833333	0.5014	BOB08G142250	methyltransferase
Chr8	52221232	C	T	0.38369	0.3786	0.0751029	0.497741	BOB08G142410	May act early in the ethylene signal transduction pathway, possibly as an ethylene receptor, or as a regulator of the pathway
Chr8	52226166	C	A	0.379834	0.4074	0.0751029	0.499598	BOB08G142420	MATH domain-containing protein
Chr8	52243721	G	C	0.381085	0.3827	0.0730453	0.49638	BOB08G142440	Zeta toxin
Chr9	492859	G	C	0.39954	0.428	0.0740741	0.515654	BOB09G001060	belongs to the protein kinase superfamily
Chr9	493571	C	G	0.389781	0.4198	0.0658436	0.507653	BOB09G001060	belongs to the protein kinase superfamily
Chr9	580912	T	A	0.388687	0.4259	0.063786	0.507386	BOB09G001280	trichome birefringence-like
Chr9	585711	T	C	0.39301	0.4465	0.0864198	0.512083	BOB09G001320	Belongs to the UDP-glycosyltransferase family
Chr9	1291706	C	A	0.420539	0.4228	0.0823045	0.530532	BOB09G002800	Zinc finger (MYND type) family protein programmed cell death 2 C-terminal domain-containing protein
Chr9	1664185	G	A	0.385988	0.4156	0.0936214	0.505893	BOB09G003500	Ubiquitin family
Chr9	1708979	A	G	0.384908	0.43	0.0792181	0.505693	BOB09G003610	P21-Rho-binding domain
Chr9	1722925	T	A	0.385183	0.4444	0.0617284	0.506234	BOB09G003650	Enoyl-(Acyl carrier protein) reductase
Chr9	1753455	C	T	0.378701	0.4362	0.0648148	0.501292	BOB09G003750	Leucine rich repeat
Chr9	2107498	C	T	0.448099	0.4084	0.0462963	0.548562	BOB09G004580	NA
Chr9	2109454	A	C	0.386611	0.4187	0.0648148	0.505217	BOB09G004600	GDP-fucose protein O-fucosyltransferase
Chr9	2270914	C	T	0.375703	0.3693	0.0740741	0.489723	BOB09G005080	Pectate lyase
Chr9	2271948	A	G	0.384136	0.4568	0.0792181	0.506115	BOB09G005080	Pectate lyase
Chr9	2280382	T	A	0.387172	0.4228	0.0699588	0.50631	BOB09G005110	Protein of unknown function (DUF707)
Chr9	2367375	C	T	0.431216	0.4012	0.0823045	0.536844	BOB09G005330	NA
Chr9	2425720	A	T	0.391151	0.4321	0.0843621	0.51032	BOB09G005470	Glycosyl transferase family 21
Chr9	2426275	C	T	0.379419	0.4372	0.095679	0.502714	BOB09G005470	Glycosyl transferase family 21
Chr9	2441661	T	A	0.376639	0.3961	0.0709877	0.495283	BOB09G005530	DNA-dependent RNA polymerase catalyzes the transcription of DNA into RNA using the four ribonucleoside triphosphates as substrates. Component of RNA polymerase II which synthesizes mRNA precursors and many functional non-coding RNAs. Pol II is the central component of the basal RNA polymerase II transcription machinery. It is composed of mobile elements that move relative to each other. Component…
Chr9	2453175	C	T	0.384452	0.3827	0.0576132	0.497407	BOB09G005540	Contains the following InterPro domains ATPase, AAA type, core (InterPro IPR003593), ABC transporter-like (InterPro IPR003439), ABC transporter, transmembrane domain, type 1 (InterPro IPR011527), ABC transporter integral membrane type 1 (InterPro IPR017940), ABC transporter, transmembrane domain (InterPro IPR001140), ABC transporter, conserved site (InterPro IPR017871)
Chr9	2528027	T	G	0.381351	0.3827	0.0576132	0.49507	BOB09G005750	Arginine methyltransferase involved in the assembly or stability of mitochondrial NADH ubiquinone oxidoreductase complex (complex I)
Chr9	2545137	A	C	0.380669	0.4434	0.0668724	0.5032	BOB09G005820	NA
Chr9	2578737	C	A	0.379492	0.4681	0.0401235	0.50286	BOB09G005890	ABC transporter B family member
Chr9	2696307	T	C	0.380583	0.3786	0.0751029	0.495414	BOB09G006180	Belongs to the disease resistance NB-LRR family
Chr9	2928031	C	G	0.408607	0.4434	0.0699588	0.522632	BOB09G006640	FRIGIDA-like protein
Chr9	2969233	T	C	0.389993	0.4506	0.06893	0.509938	BOB09G006700	Glutamate-gated receptor that probably acts as non- selective cation channel
Chr9	2981291	T	A	0.376847	0.3951	0.0761317	0.495688	BOB09G006720	BEST Arabidopsis thaliana protein match is Plant protein of
Chr9	2981630	C	G	0.380631	0.3981	0.0802469	0.499238	BOB09G006720	BEST Arabidopsis thaliana protein match is Plant protein of
Chr9	3046440	A	T	0.382459	0.4156	0.0812757	0.502813	BOB09G006890	Belongs to the universal ribosomal protein uL13 family
Chr9	3152521	A	G	0.38799	0.4053	0.0884774	0.506031	BOB09G007110	NA
Chr9	3156944	G	T	0.413689	0.3889	0.0823045	0.522441	BOB09G007120	Myb domain protein 111
Chr9	3875255	T	C	0.379599	0.4599	0.0771605	0.503072	BOB09G008890	Belongs to the major facilitator superfamily. Sugar transporter (TC 2.A.1.1) family
Chr9	3943708	G	T	0.373102	0.3714	0.0761317	0.488433	BOB09G009070	Belongs to the class I-like SAM-binding methyltransferase superfamily. RsmB NOP family
Chr9	3944492	C	T	0.385809	0.3765	0.0864198	0.499998	BOB09G009070	Belongs to the class I-like SAM-binding methyltransferase superfamily. RsmB NOP family
Chr9	3988135	A	G	0.381858	0.4126	0.0740741	0.501636	BOB09G009190	Exostosin family
Chr9	4090305	C	G	0.390739	0.394	0.0781893	0.505862	BOB09G009370	BAH domain
Chr9	4096538	C	T	0.388802	0.4177	0.0833333	0.50761	BOB09G009380	Protein of unknown function (DUF632)
Chr9	4123288	C	G	0.382609	0.4537	0.0781893	0.505061	BOB09G009460	ethylene-responsive transcription factor
Chr9	4141913	T	C	0.387704	0.428	0.0751029	0.50735	BOB09G009510	EIN3-binding F box protein 2
Chr9	4148171	C	A	0.39275	0.429	0.0967078	0.511575	BOB09G009520	Serine-rich protein-related
Chr9	4400765	C	T	0.388603	0.4537	0.0771605	0.509112	BOB09G010040	6-phosphogluconolactonase
Chr9	4679554	C	T	0.380423	0.4331	0.0771605	0.502713	BOB09G010800	26S proteasome
Chr9	4710501	C	T	0.390195	0.4053	0.104938	0.508457	BOB09G010900	May participate in a complex which severs microtubules in an ATP-dependent manner. Microtubule severing may promote rapid reorganization of cellular microtubule arrays
Chr9	4736748	G	A	0.38895	0.3971	0.0936214	0.506042	BOB09G010980	Leucine rich repeat N-terminal domain
Chr9	4757270	G	T	0.387788	0.3827	0.0606996	0.500227	BOB09G011050	Belongs to the dihydroorotate dehydrogenase family. Type 2 subfamily
Chr9	4763383	A	G	0.388869	0.3848	0.0699588	0.502284	BOB09G011070	Transcription factor
Chr9	4787664	G	A	0.397237	0.4064	0.0925926	0.512998	BOB09G011110	Protein of unknown function, DUF617
Chr9	4898243	T	G	0.387105	0.4619	0.058642	0.508086	BOB09G011430	nuclear transport factor 2 (NTF2) family protein RNA recognition motif (RRM)-containing protein
Chr9	4902118	G	A	0.381073	0.4599	0.0627572	0.504	BOB09G011440	DNA recombination
Chr9	4910084	G	A	0.396236	0.4156	0.0524691	0.511075	BOB09G011460	histone deacetylase
Chr9	4949648	A	C	0.363235	0.3488	0.0606996	0.47332	BOB09G011540	Apoptosis antagonizing transcription factor
Chr9	5070877	T	C	0.388243	0.4372	0.0781893	0.508406	BOB09G011840	Contains the following InterPro domains Protein of
Chr9	5074411	A	G	0.386341	0.4342	0.0679012	0.506586	BOB09G011850	APO protein 3
Chr9	5457232	G	T	0.383096	0.4023	0.0884774	0.502144	BOB09G012890	Permease family
Chr9	5476637	G	A	0.430616	0.4177	0.0699588	0.537181	BOB09G012920	Permease family
Chr9	5809374	C	A	0.388543	0.4455	0.0833333	0.508995	BOB09G014000	adenylate kinase
Chr9	5856930	G	A	0.392767	0.4393	0.0771605	0.511608	BOB09G014130	CBS domain-containing protein
Chr9	6046748	C	T	0.389212	0.4311	0.06893	0.50841	BOB09G014690	Belongs to the alternative oxidase family
Chr9	6131549	G	A	0.389212	0.427	0.0771605	0.50841	BOB09G014950	beta-D-xylosidase
Chr9	6935048	C	T	0.382501	0.4506	0.0709877	0.504848	BOB09G017160	RING-type E3 ubiquitin transferase
Chr9	6958678	G	A	0.382264	0.4424	0.0720165	0.50438	BOB09G017240	tRNA-dihydrouridine(16 17) synthase NAD(P)( ) -like
Chr9	7075866	C	A	0.397121	0.429	0.0946502	0.514566	BOB09G017650	disease resistance
Chr9	8607731	G	C	0.385516	0.4393	0.0925926	0.50689	BOB09G021590	phosphoserine aminotransferase
Chr9	10760161	C	T	0.416764	0.4352	0.0751029	0.528195	BOB09G027460	homeobox
Chr9	10762847	C	T	0.386985	0.4403	0.0874486	0.507849	BOB09G027470	SPX (SYG1 Pho81 XPR1) domain-containing protein
Chr9	10763027	A	G	0.381698	0.4198	0.0946502	0.503262	BOB09G027470	SPX (SYG1 Pho81 XPR1) domain-containing protein
Chr9	10881766	G	A	0.392995	0.463	0.0504115	0.512053	BOB09G027690	Belongs to the GRAS family
Chr9	12012650	A	G	0.392767	0.4259	0.103909	0.511608	BOB09G030700	cationic amino acid transporter
Chr9	14979895	T	C	0.389879	0.4516	0.0576132	0.509714	BOB09G038340	Belongs to the multi antimicrobial extrusion (MATE) (TC 2.A.66.1) family
Chr9	15385117	A	C	0.375955	0.3796	0.0740741	0.49206	BOB09G039460	serine threonine-protein kinase
Chr9	16074374	T	A	0.40925	0.4228	0.0730453	0.522176	BOB09G041180	ATP citrate lyase citrate-binding
Chr9	16740860	C	G	0.383036	0.4249	0.0781893	0.503948	BOB09G042990	negative regulation of Rho guanyl-nucleotide exchange factor activity
Chr9	19766095	T	C	0.384742	0.3889	0.0679012	0.499757	BOB09G051330	belongs to the thioredoxin family
Chr9	19769080	A	G	0.409403	0.4084	0.06893	0.520814	BOB09G051340	ubiquitin-conjugating enzyme
Chr9	19870498	G	C	0.395201	0.4198	0.0925926	0.512661	BOB09G051560	Belongs to the enoyl-CoA hydratase isomerase family
Chr9	19901917	A	C	0.406795	0.3796	0.0823045	0.515921	BOB09G051630	phosphate transporter
Chr9	19903212	A	G	0.39905	0.3776	0.0802469	0.509568	BOB09G051630	phosphate transporter
Chr9	20085358	T	A	0.377759	0.3621	0.0936214	0.491829	BOB09G052150	electron transfer flavoprotein
Chr9	20220568	T	C	0.379551	0.3961	0.0925926	0.499045	BOB09G052480	BEST Arabidopsis thaliana protein match is Protein of
Chr9	20221854	A	C	0.38533	0.393	0.0915638	0.502727	BOB09G052480	BEST Arabidopsis thaliana protein match is Protein of
Chr9	20296005	A	T	0.394208	0.4537	0.0462963	0.512564	BOB09G052600	WD repeat-containing protein
Chr9	20370582	G	A	0.389831	0.4516	0.0545267	0.509621	BOB09G052780	acid phosphatase
Chr9	20408007	G	T	0.385409	0.4537	0.0555556	0.506679	BOB09G052890	NA
Chr9	20453236	C	A	0.378272	0.4095	0.0709877	0.498475	BOB09G053010	serine threonine protein phosphatase 2A regulatory subunit
Chr9	20457306	A	T	0.386834	0.4434	0.0709877	0.507553	BOB09G053020	belongs to the protein kinase superfamily
Chr9	21604728	T	C	0.382962	0.3899	0.0627572	0.498157	BOB09G056110	NB-ARC domain
Chr9	22886085	T	G	0.388618	0.4095	0.0627572	0.505401	BOB09G059490	transcription factor
Chr9	26328841	T	C	0.394469	0.4506	0.0771605	0.513072	BOB09G069340	AMP-binding enzyme C-terminal domain
Chr9	26505994	A	T	0.427194	0.4228	0.0812757	0.535281	BOB09G069780	PAP-specific phosphatase, mitochondrial
Chr9	26597550	A	G	0.392872	0.4496	0.063786	0.511812	BOB09G070060	At4g04980-like
Chr9	26597811	C	G	0.386959	0.4393	0.0874486	0.507798	BOB09G070060	At4g04980-like
Chr9	26684134	T	G	0.385505	0.4115	0.147119	0.506868	BOB09G070290	Thioredoxin family
Chr9	28117243	G	T	0.368486	0.3591	0.0565844	0.479627	BOB09G074580	Belongs to the STXBP unc-18 SEC1 family
Chr9	45913563	T	C	0.39732	0.4053	0.0967078	0.513156	BOB09G125380	WD-40 repeat family protein
Chr9	45970152	G	A	0.388493	0.4475	0.0740741	0.508897	BOB09G125500	oligopeptide transporter
Chr9	45970615	C	A	0.390463	0.3981	0.0915638	0.507138	BOB09G125500	oligopeptide transporter
Chr9	46069613	G	T	0.380262	0.3724	0.0504115	0.491225	BOB09G125780	Domain in Tre-2, BUB2p, and Cdc16p. Probable Rab-GAPs.
Chr9	46782605	C	T	0.368192	0.3745	0.06893	0.484634	BOB09G127750	Peptidase family M20/M25/M40
Chr9	52582799	C	A	0.388559	0.4547	0.0668724	0.509027	BOB09G144320	Ring finger
Chr9	52627486	G	A	0.378959	0.43	0.0864198	0.501801	BOB09G144430	Belongs to the glycosyl hydrolase 17 family
Chr9	53100412	T	A	0.381117	0.4465	0.100823	0.504088	BOB09G145900	BEST Arabidopsis thaliana protein match is
Chr9	53173854	C	T	0.378701	0.4228	0.0915638	0.501292	BOB09G146100	Lignin degradation and detoxification of lignin-derived products
Chr9	54286936	A	T	0.382147	0.4187	0.0679012	0.502202	BOB09G149320	NA
Chr9	55272926	T	G	0.371409	0.3663	0.06893	0.485186	BOB09G152020	Heavy-metal-associated domain
Chr9	55479687	C	T	0.376709	0.394	0.0761317	0.495419	BOB09G152860	SRSF protein kinase
Chr9	55480809	T	C	0.372951	0.3786	0.0781893	0.490027	BOB09G152870	magnesium transporter
Chr9	55534334	A	G	0.378119	0.3776	0.0853909	0.494366	BOB09G152990	Subunit of the adaptor protein complex 2 (AP-2). Adaptor protein complexes function in protein transport via transport vesicles in different membrane traffic pathways. Adaptor protein complexes are vesicle coat components and appear to be involved in cargo selection and vesicle formation. AP-2 is involved in clathrin-dependent endocytosis in which cargo proteins are incorporated into vesicles sur…
Chr9	55534568	A	G	0.37378	0.3796	0.0864198	0.491636	BOB09G152990	Subunit of the adaptor protein complex 2 (AP-2). Adaptor protein complexes function in protein transport via transport vesicles in different membrane traffic pathways. Adaptor protein complexes are vesicle coat components and appear to be involved in cargo selection and vesicle formation. AP-2 is involved in clathrin-dependent endocytosis in which cargo proteins are incorporated into vesicles sur…
Chr9	55547701	A	C	0.383503	0.3786	0.0925926	0.499198	BOB09G153020	Glycosyl transferase family 21
Chr9	55561322	C	G	0.388686	0.3858	0.0864198	0.503715	BOB09G153050	Possible plasma membrane-binding motif in junctophilins, PIP-5-kinases and protein kinases.
Chr9	55599213	T	C	0.37907	0.3981	0.0802469	0.498105	BOB09G153170	Stress responsive A/B Barrel Domain
Chr9	55641443	G	C	0.388896	0.4033	0.0802469	0.505938	BOB09G153390	DNA binding domain
Chr9	55699390	C	A	0.384819	0.393	0.0606996	0.499904	BOB09G153560	UPF0481 protein At3g47200-like
Chr9	55785364	C	T	0.374973	0.3745	0.0730453	0.490168	BOB09G153730	poly ADP-ribose polymerase
Chr9	55913270	C	T	0.37488	0.3755	0.0699588	0.489989	BOB09G154050	Catalyzes the reduction of fatty acyl-CoA to fatty alcohols
Chr9	55993092	A	T	0.374214	0.3704	0.0730453	0.488711	BOB09G154270	Belongs to the RuvB family
Chr9	56430763	T	C	0.379731	0.4198	0.0823045	0.501346	BOB09G155540	Pentacotripeptide-repeat region of PRORP
Chr9	56430910	T	C	0.377668	0.4167	0.0761317	0.499249	BOB09G155540	Pentacotripeptide-repeat region of PRORP
Chr9	56431297	T	C	0.386696	0.4352	0.0802469	0.507282	BOB09G155540	Pentacotripeptide-repeat region of PRORP
Chr9	56621505	G	T	0.414384	0.4136	0.0771605	0.525326	BOB09G155990	aldehyde oxidase
Chr9	56883204	A	T	0.372437	0.3519	0.063786	0.481742	BOB09G156720	Auxin response factors (ARFs) are transcriptional factors that bind specifically to the DNA sequence 5'-TGTCTC-3' found in the auxin-responsive promoter elements (AuxREs)
Chr9	58489355	G	A	0.38858	0.4455	0.0884774	0.509067	BOB09G161090	acyl-CoA-binding domain-containing protein
Chr9	58543357	C	T	0.39099	0.3724	0.0658436	0.501118	BOB09G161250	nucleic acid binding zinc ion binding
Chr9	58657333	T	G	0.380692	0.4023	0.0730453	0.499358	BOB09G161460	belongs to the protein kinase superfamily
Chr9	59158133	G	A	0.380314	0.3889	0.0936214	0.498621	BOB09G162890	Ring finger
Chr9	59160285	T	G	0.381222	0.3992	0.0884774	0.500392	BOB09G162900	NA
Chr9	59166045	A	C	0.381961	0.429	0.0853909	0.503781	BOB09G162910	DNA-binding transcription factor activity
Chr9	59814208	T	G	0.400166	0.3858	0.0792181	0.511672	BOB09G164670	Belongs to the TPP enzyme family
Chr9	60099514	G	C	0.380471	0.3951	0.0606996	0.497045	BOB09G165610	DYW family of nucleic acid deaminases
Chr9	60099637	A	G	0.376427	0.4012	0.0576132	0.494869	BOB09G165610	DYW family of nucleic acid deaminases
Chr9	60106712	C	T	0.374712	0.3889	0.0596708	0.491539	BOB09G165630	nucleic acid binding nucleotide binding oxidoreductase
Chr9	61011144	C	T	0.38799	0.4403	0.0606996	0.507911	BOB09G168000	peptidyl-tyrosine sulfation
Chr9	61013795	G	C	0.383518	0.4321	0.0802469	0.504896	BOB09G168010	tRNA rRNA methyltransferase (SpoU) family protein
Chr9	61402206	C	T	0.390077	0.3961	0.0884774	0.506393	BOB09G169050	Belongs to the UDP-glycosyltransferase family
Chr9	61418764	C	G	0.42093	0.4342	0.090535	0.531262	BOB09G169110	Belongs to the pyrroline-5-carboxylate reductase family
Chr9	61478008	C	A	0.38312	0.3796	0.0853909	0.498459	BOB09G169260	Serine threonine-protein kinase
Chr9	61808412	G	A	0.391329	0.4136	0.0792181	0.508814	BOB09G170070	SWIB/MDM2 domain
Chr9	61813542	T	G	0.395386	0.4239	0.0915638	0.51302	BOB09G170090	Nodulin-like
Chr9	61815114	C	T	0.442638	0.3765	0.0606996	0.541396	BOB09G170090	Nodulin-like
Chr9	61815258	T	C	0.384936	0.4198	0.100823	0.505747	BOB09G170090	Nodulin-like
Chr9	61816281	A	G	0.389479	0.3879	0.0946502	0.505239	BOB09G170090	Nodulin-like
Chr9	61848024	C	T	0.380914	0.4187	0.0751029	0.501717	BOB09G170190	WD domain, G-beta repeat
Chr9	61966975	C	A	0.399511	0.4249	0.0792181	0.5156	BOB09G170510	Belongs to the CTL (choline transporter-like) family
Chr9	62054514	T	G	0.38916	0.4053	0.0812757	0.506449	BOB09G170720	Acts as subunit of the RNA polymerase II elongator complex, which is a histone acetyltransferase component of the RNA polymerase II (Pol II) holoenzyme and is involved in transcriptional elongation
Chr9	62055063	G	T	0.375455	0.4095	0.0771605	0.496864	BOB09G170720	Acts as subunit of the RNA polymerase II elongator complex, which is a histone acetyltransferase component of the RNA polymerase II (Pol II) holoenzyme and is involved in transcriptional elongation
Chr9	62055333	T	C	0.379447	0.4228	0.06893	0.500787	BOB09G170720	Acts as subunit of the RNA polymerase II elongator complex, which is a histone acetyltransferase component of the RNA polymerase II (Pol II) holoenzyme and is involved in transcriptional elongation
Chr9	62126840	T	C	0.387893	0.4064	0.0843621	0.505843	BOB09G170890	ATP synthase
Chr9	62129684	C	T	0.398487	0.4074	0.132716	0.515406	BOB09G170900	Component of the ubiquinol-cytochrome c reductase complex (complex III or cytochrome b-c1 complex), which is a respiratory chain that generates an electrochemical potential coupled to ATP synthesis
Chr9	62129921	A	T	0.418878	0.3889	0.13786	0.528991	BOB09G170900	Component of the ubiquinol-cytochrome c reductase complex (complex III or cytochrome b-c1 complex), which is a respiratory chain that generates an electrochemical potential coupled to ATP synthesis
Chr9	62405706	C	A	0.39467	0.3889	0.058642	0.50636	BOB09G171590	leucine-rich repeat family protein
Chr9	62458341	G	A	0.445977	0.4064	0.0987654	0.548593	BOB09G171740	Ribonuclease H protein
Chr9	62491804	C	G	0.411026	0.427	0.0792181	0.523881	BOB09G171830	Sodium:sulfate symporter transmembrane region
Chr9	62559623	C	G	0.384135	0.4537	0.0843621	0.506114	BOB09G171940	tRNA modification
Chr9	62566803	G	A	0.389864	0.4403	0.0792181	0.509684	BOB09G171950	DDT domain
Chr9	62659374	A	G	0.382005	0.4002	0.101852	0.501924	BOB09G172240	Geranylgeranyl transferase
Chr9	62659720	T	A	0.380242	0.3796	0.0884774	0.496602	BOB09G172240	Geranylgeranyl transferase
Chr9	62745934	G	T	0.389242	0.4177	0.0967078	0.50847	BOB09G172440	Belongs to the small heat shock protein (HSP20) family
Chr9	63143600	T	A	0.396838	0.4167	0.0627572	0.512231	BOB09G173400	Ferrous iron transport protein B
Chr9	63154017	C	T	0.382193	0.4105	0.0853909	0.502292	BOB09G173420	BAH domain
Chr9	63233754	A	G	0.398149	0.3961	0.0730453	0.511246	BOB09G173600	NA
Chr9	63239213	T	A	0.388599	0.4537	0.0761317	0.509105	BOB09G173610	monooxygenase
Chr9	63257073	C	A	0.382469	0.394	0.06893	0.499047	BOB09G173650	NA
Chr9	63380588	C	A	0.388401	0.4352	0.0915638	0.508716	BOB09G174000	Transport protein Trs120 or TRAPPC9, TRAPP II complex subunit
Chr9	63391528	G	T	0.388647	0.4105	0.0936214	0.507309	BOB09G174020	belongs to the protein kinase superfamily
Chr9	64088269	T	A	0.383545	0.4012	0.0709877	0.50113	BOB09G175920	26S proteasome non-ATPase regulatory subunit 12 homolog
Chr9	64088446	T	A	0.382421	0.4475	0.0709877	0.504689	BOB09G175920	26S proteasome non-ATPase regulatory subunit 12 homolog
Chr9	64164830	G	A	0.395116	0.3961	0.0720165	0.508933	BOB09G176130	Transcription factor
Chr9	64165085	G	A	0.407068	0.3971	0.0740741	0.518053	BOB09G176130	Transcription factor
Chr9	64354981	C	A	0.386931	0.4393	0.0853909	0.507743	BOB09G176760	RNA helicase
Chr9	64372208	A	C	0.385568	0.4136	0.0864198	0.505072	BOB09G176810	GC-rich sequence DNA-binding factor-like protein
Chr9	64427041	T	G	0.381634	0.4187	0.0946502	0.503135	BOB09G176950	Cleft lip and palate transmembrane protein 1 homolog
Chr9	64762553	T	C	0.387058	0.4444	0.0864198	0.507993	BOB09G177780	Belongs to the eukaryotic ribosomal protein eS4 family
Chr9	64769829	T	C	0.3788	0.4105	0.0792181	0.499513	BOB09G177810	serine threonine-protein kinase
Chr9	64781181	T	G	0.387794	0.4074	0.0802469	0.50565	BOB09G177850	Belongs to the protein kinase superfamily. Ser Thr protein kinase family
Chr9	64782548	G	A	0.380249	0.3971	0.0761317	0.498495	BOB09G177850	Belongs to the protein kinase superfamily. Ser Thr protein kinase family
Chr9	64889209	C	A	0.382014	0.4352	0.0751029	0.503885	BOB09G178050	calcium-dependent phospholipid binding
Chr9	64903707	G	T	0.426996	0.4321	0.0534979	0.534914	BOB09G178090	Mitochondrial carrier
Chr9	65040016	T	A	0.410292	0.428	0.0514403	0.522492	BOB09G178460	BEST Arabidopsis thaliana protein match is nucleolar protein
Chr9	65087111	T	A	0.374672	0.3683	0.0504115	0.485955	BOB09G178540	mitochondrial transcription termination
Chr9	65310597	C	T	0.387126	0.4619	0.0658436	0.508127	BOB09G179140	Testis-expressed sequence 10 protein
Chr9	65322081	C	A	0.393806	0.4352	0.0648148	0.511783	BOB09G179180	splicing factor 3A subunit 1
Chr9	65322334	G	A	0.38996	0.4516	0.063786	0.509873	BOB09G179180	splicing factor 3A subunit 1
Chr9	65466196	A	G	0.395604	0.4393	0.0709877	0.513444	BOB09G179530	domain in TBC and LysM domain containing proteins
Chr9	65466346	A	C	0.385023	0.3992	0.0740741	0.502132	BOB09G179530	domain in TBC and LysM domain containing proteins
Chr9	65487974	A	T	0.405914	0.4609	0.0545267	0.520903	BOB09G179550	BEST Arabidopsis thaliana protein match is
Chr9	65490138	A	C	0.380938	0.4516	0.0658436	0.503732	BOB09G179560	Mitochondrial fission ELM1
Chr9	65492930	T	C	0.396754	0.43	0.0751029	0.513856	BOB09G179570	transmembrane transporter sucrose hydrogen symporter sugar hydrogen symporter
Chr9	65512710	C	T	0.38479	0.4105	0.0751029	0.503552	BOB09G179620	Importin-beta N-terminal domain
Chr9	65597645	C	T	0.392872	0.4506	0.0617284	0.511812	BOB09G179780	Deoxyhypusine synthase
Chr9	65805113	T	G	0.393692	0.4372	0.0565844	0.511563	BOB09G180270	Contains the following InterPro domains RNA helicase, DEAD-box type, Q motif (InterPro IPR014014), DNA RNA helicase, DEAD DEAH box type, N-terminal (InterPro IPR011545), RNA helicase, ATP-dependent, DEAD-box, conserved site (InterPro IPR000629), DEAD-like helicase, N-terminal (InterPro IPR014001), DNA RNA helicase, C-terminal (InterPro IPR001650), Helicase, superfamily 1 2, ATP-binding domain (In…
Chr9	65821204	T	C	0.388605	0.4486	0.0884774	0.509117	BOB09G180320	Lignin degradation and detoxification of lignin-derived products
Chr9	65823076	A	G	0.385635	0.4527	0.0874486	0.507124	BOB09G180320	Lignin degradation and detoxification of lignin-derived products
Chr9	65883966	G	A	0.437232	0.4321	0.0473251	0.542192	BOB09G180510	AAA domain
Chr9	65900335	A	C	0.380049	0.3693	0.0545267	0.490823	BOB09G180550	Belongs to the protein kinase superfamily. Ser Thr protein kinase family
Chr9	66075318	C	T	0.385957	0.4064	0.0761317	0.503944	BOB09G180970	3-ketoacyl-coa synthase
Chr9	66080382	C	T	0.382704	0.4177	0.0833333	0.503295	BOB09G180980	RNA helicase
Chr9	66095886	G	A	0.395877	0.4455	0.0792181	0.513973	BOB09G181000	glycosyl hydrolase family 3 protein
Chr9	66213878	T	A	0.387436	0.3745	0.0730453	0.499558	BOB09G181310	Belongs to the cytochrome P450 family
Chr9	66218001	C	T	0.380057	0.4372	0.0565844	0.501989	BOB09G181320	2-amino-3-ketobutyrate coenzyme A ligase
Chr9	66521457	T	C	0.404503	0.4619	0.0504115	0.519928	BOB09G181830	phytochrome kinase substrate
Chr9	66541842	G	A	0.379493	0.4033	0.0771605	0.498932	BOB09G181890	Glutamate synthase 1
Chr9	66572884	A	G	0.399698	0.4444	0.0473251	0.515959	BOB09G181950	Type II intron maturase
Chr9	66581025	G	A	0.383224	0.3909	0.0864198	0.500508	BOB09G181990	Triacylglycerol lipase
Chr9	66642848	C	T	0.452106	0.43	0.0565844	0.553179	BOB09G182140	NA
Chr9	66643493	T	A	0.38412	0.427	0.0617284	0.504147	BOB09G182140	NA
Chr9	66684560	T	A	0.39576	0.4198	0.0658436	0.511937	BOB09G182240	Glutathione S-transferase, N-terminal domain
Chr9	66685252	C	T	0.396672	0.4383	0.0555556	0.513698	BOB09G182240	Glutathione S-transferase, N-terminal domain
Chr9	66756232	G	A	0.391454	0.4599	0.0483539	0.510913	BOB09G182410	3-Deoxy-D-manno-octulosonic-acid transferase (kdotransferase)
Chr9	67218457	G	C	0.37393	0.3868	0.0545267	0.490029	BOB09G183450	Putative zinc- or iron-chelating domain
Chr9	67284457	C	G	0.38716	0.3971	0.063786	0.502589	BOB09G183550	Paf1
Chr9	67306574	C	A	0.38188	0.3827	0.0462963	0.49429	BOB09G183600	zinc finger
Chr9	67551847	G	T	0.38264	0.3837	0.0709877	0.497539	BOB09G184010	domain associated with HOX domains
Chr9	67626405	A	T	0.388607	0.4156	0.0823045	0.507231	BOB09G184130	GDP-fucose protein O-fucosyltransferase
Mean				0.388777	0.418752	0.0748454	0.506401
Max				0.503478	0.4753	0.193416	0.591219
Min				0.363235	0.3426	0.0288066	0.47332

## Sheet: Table S3
Table S3. KASP primers used in this study
Assay ID	Marker Verification	Chromosome	Position	AlleleX	AlleleY	Primer Seq Allele X	Primer Seq Allele Y	Primer Seq common	Squence
CauSNP001	Pass	Chr1	860653	C	G	CTTCTCCGGCGACTTCC	GCTCTTCTCCGGCGACTTCG	GGACACGCTCACAATCTGGCCAA	AGTCATCTCCAAGTCGTTTAATGCACCAAAGATCCTCTTCGCACGATAACACTTTCCAGTGTGGTATCCCTCGCCGCAACGGCTCTTCTCCGGCGACTTC[C/G]GTCGCCAAAACGCCGCAGCCTCCTCCCTTGGCCAGATTGTGAGCGTGTCCGCACAGAGACTTCACCATCTTCGCCGCACGTGGACCTTCCCCACCAATCC
CauSNP002	Pass	Chr1	975765	C	T	GGTCCGAGAAAAGCGGTTCC	AGGTCCGAGAAAAGCGGTTCT	CACATCCGTAAAGACGAAATCCGCAT	GTTCCGCTTCTTCCTTGTTGTTCACGTCATCGCCATAATATCTCTTCCCTGTGATCATTCTTACGATGTTGTTGAACGTTAGGTCCGAGAAAAGCGGTTC[C/T]AGCTCGACGTGGGTGAAACGGCTCCCGGCGTCGGAGTGAGTTGTGTCACGTGAGAGGCGCATGAGCATGATGCGGATTTCGTCTTTACGGATGTGGAGGA
CauSNP003	Pass	Chr1	1581568	C	A	GAAGACCTAGAGTGGCTATCC	GGAAGACCTAGAGTGGCTATCA	GGTTTAACCGGAACGTACTGCCTTT	TGTTTTTGCTCTGTTTTTACTCTGTTTTTGCTCTGTTTTAAAATTATCTTCTTCTTTTTTATGTAAAGGTTGGTGATTTGGAAGACCTAGAGTGGCTATC[C/A]AATTTCGTGGATGATTCTTTTTCAGATTATCATGACTTTCCAGTGAATCCAGTTGCGTCGGTGGAGGTTCAAAGGCAGTACGTTCCGGTTAAACCCCGAA
CauSNP004	Pass	Chr1	2022083	A	T	CATGCCTTCTAAGATGACCAAGTCT	CATGCCTTCTAAGATGACCAAGTCA	AGAGGTTGCCTACCTTTCAACCGAT	CTCCTGTTTATTGATTTGGCTTTTCTCTCTTTAAATTATCGTTTCAGGTTATTGATCTTGCAAGAGTATCACAAGAGGTTGCCTACCTTTCAACCGATGC[A/T]GACTTGGTCATCTTAGAAGGCATGGTAAGATCCCTACTAGTCTCTTGTCTATAGTCTTTGGTTTCAACTTTCAGTAAAACTGACTCTTTAGATTGTTCTG
CauSNP005	Pass	Chr1	2022902	C	T	GAACAGAACTAGACCATGGTGTG	GGAACAGAACTAGACCATGGTGTA	GATCCCTTTGATGAACCGTACCCAA	TCTTCATCCTAATAAACCCTTTCTCTCCCCACCTTGGTCCCCATGAGTTCTTCACAATGACATAGTCTGATCCCTTTGATGAACCGTACCCAACTGCAGC[C/T]ACACCATGGTCTAGTTCTGTTCCACACTTCCCATTAAACACTCCCTGCAACCAAAACAAAGATTAGATACACAGAACACAAAAGTTTAGATATGAGAATG
CauSNP006	Pass	Chr1	9494597	G	T	AGCCTGAAACTTAGTCCATCTCTTG	CAGCCTGAAACTTAGTCCATCTCTTT	GAGGAGTTGAGATGGAACGAGACTT	TTCCGTTAGATCCTTTCATGTCACATATACCGAAACTCCCACAACGGTTGTACTTATCACACTCACTCTCGGGAGCAGCCTGAAACTTAGTCCATCTCTT[G/T]GAAGTCTCGTTCCATCTCAACTCCTCTTCGGTCCCGTTGTGAAGAACCTTAAACCTAAGCAGAACCGATGGGTCCGAAGGAACATACGTGAAGTACACGC
CauSNP007	Pass	Chr1	16591554	A	C	TCTCGGAGTAGGTGATGAAGAAT	CTCGGAGTAGGTGATGAAGAAG	TCTCTACTCGCTGTCCTCTTCCTAT	GACCAGGCCCGAAGCCATGGCCGAACAGGAAGAAGCAAACCAACAAATCCGCCATCTGTCTCTGCTCCGTCTCTCTACTCGCTGTCCTCTTCCTATCCGT[A/C]TTCTTCATCACCTACTCCGAGATACCCAAATCCATCTTCTCGATCTCCTCCGCCTTCTCCGGATCCGTCGAATTCCCTCAATGCAGATCCGAGACACTAT
CauSNP008	Mono	Chr1	19141234	T	C	GAGTGCAGGTCCCAAATCCTCTA	AGTGCAGGTCCCAAATCCTCTG	CCACACATTATTCCAGCGAGGTCAA	GTATATGAGTTTTAATGATCGCCTTTCCGATTAAAGTGGCCAGAAAGAATTCCCAAAATGGAATGCCAAACTGTCCACACATTATTCCAGCGAGGTCAAA[T/C]AGAGGATTTGGGACCTGCACTCAAAACAGAAGTAGTGTGTAGATGGTGAACACTAGTATAAAGTATTGTAGTTGGCTAATGCATAATACTAACCGAAGCA
CauSNP009	Pass	Chr1	45449565	T	A	GATATGTGTGATGAGTCTGTCTGCA	GATATGTGTGATGAGTCTGTCTGCT	TGTGCTCAGAGTTGTGATCAGGGAA	GGAAGTTCGGATGGATAATACCGGCTTACACTATGCCTGCAGATGCACAACACATTGCTGTGCTCAGAGTTGTGATCAGGGAAGACTTTAACCGAGGCCT[T/A]GCAGACAGACTCATCACACATATCTTACAGGTACTGAAGGAGATCGAAGGGCTTCCTAGCCGGATTGCGCATATAGCAGCTGCTGCAAAGGTTAGTGGTG
CauSNP010	Pass	Chr2	3174530	A	G	ATGGAGCTAGCTCCAGGGGTT	GGAGCTAGCTCCAGGGGTC	TACGGCAACTCATCTAACCCTGGAT	GCTTCATGAACTCTCACTTCACTTCCTCTTACGGCAACTCATCTAACCCTGGATGTGGTGGTGGACCCGGCTACCACAATCCCGCTATGATGAGCGTCTC[A/G]ACCCCTGGAGCTAGCTCCATGGTGACAGACGCCAACTCTGGAGGAGGAGGGATCTCTGGAGGCGGTCCGCATCTGCAGCGCAGCGCCAGCATCAATAACG
CauSNP011	Pass	Chr2	14297682	G	A	ACATCTCTGTTTATCATCAGGTGTC	CACATCTCTGTTTATCATCAGGTGTT	CCATGTGGGCTAAAGCTTTGGGATT	TCCTGTTGCAACTAACATTGCCAGCGGTGTTGCAACTTCCTTTCCATCGACAAGGAACAGGTCCAAGACCATGTGGGCTAAAGCTTTGGGATTCAGACCA[G/A]ACACCTGATGATAAACAGAGATGTGGGTTTAGTTGTTTTTTTTTCTTGATGACTCTGGTATCTGGATGCCCTAAAAAAAGACCAGAGACAAGACTAGCGC
CauSNP012	Pass	Chr2	39230790	T	A	GTGTCAACAATGTTGGCAAAGGCT	GTGTCAACAATGTTGGCAAAGGCA	CATCCGCGTCCTTCCTTATAACCAA	CAAATCTAAACCTCTCTGTTTTCTCAAATCTAAAGCCAAGCTCTTACAATGAGGTCTCTGTAGCAATGGTGAAGGAGGTGTCAACAATGTTGGCAAAGGC[T/A]TTGGTTATAAGGAAGGACGCGGATGCCATGGCGGCACAGTCGGCGGGAATGGTGGAAGATGTTGAAACAGTGATGGGTATAGTGGATACCCACGGGGAAA
CauSNP013	Pass	Chr2	65005201	C	T	GGGTAACTTGATGATAAAAGAAACCG	GGGGTAACTTGATGATAAAAGAAACCA	CGAATGTGTTGGCACTTCTTGGCAA	ACCAGTTTTCTCTTTTCTCCTTTCTCTGTCTTTATTTCAGCAAAACAGCGAATGTGTTGGCACTTCTTGGCAAAGTAGCTACATGTGCTTTGATGCTAAC[C/T]GGTTTCTTTTATCATCAAGTTACCCCATCAATGAAGCTCGAGGGTTATATGAGCTCCTCTTCTTCTGAGTAAGCCTTTTTGCTTGAGCTTCTGTAACTTA
CauSNP014	Pass	Chr2	66045832	A	T	ACGATGAAGGGAGAGACTGACA	CGATGAAGGGAGAGACTGACT	CGATATCCAAGCTCCACCTACTCTT	TCGAGGTACCAAAATTCAATAATTCAAGGATATTCTTATGGAAATGAGAGAGTTGCTTACCGTTGTCGGAAAGAACAGGACGATGAAGGGAGAGACTGAC[A/T]AGTGAGAGAAGAAAGAGTAGGTGGAGCTTGGATATCGCCATTGATGCTTGAGGAGGTTCTTTAGCTTTTTGCTGATTTTTTTCCGATGGCGCTTCTCTCT
CauSNP015	Mono	Chr3	4379152	G	T	AGGTGGTGTGCCAAAAGTTCCG	GAGGTGGTGTGCCAAAAGTTCCT	CGGCATCCACAGCTTCATTGCTAAT	CCTGTTTTGCTTTGCGCCAATATTTTAGAGCTCATCTGCTTTTGCTTGTGGAATCCATTCGTCCAAGCAGAAGTGGCCGAGGTGGTGTGCCAAAAGTTCC[G/T]AATATAAGGGCAGCCCATAAGCCCCTTGACATTAGCAATGAAGCTGTGGATGCCGTATTCCTTCAGTTACAGAAGGATAGGAAGTTGGGTCCGACCTTTG
CauSNP016	Pass	Chr3	6005226	T	C	CCTGGCTGCATCTTCTAAATTGGTA	CTGGCTGCATCTTCTAAATTGGTG	GTTGTTGGAGACTTGATGACCCCTT	TTCTCCAGACGTTTAATGAACTCCAGAAACTGATAAGTAAGACACATGGACAAGTTGTTGGAGACTTGATGACCCCTTCTCCTCTGGTTGTCCGTGGTTC[T/C]ACCAATTTAGAAGATGCAGCCAGGTATCCTCCTCTGTGAATATAAGCTCAGTATGTGAAAGCAACACGTGCAGACAAGTCTGTAACCATTTGTTGTCTCC
CauSNP017	Mono	Chr3	53697731	G	A	CACTCAATCGACGAAACCTCC	CTCACTCAATCGACGAAACCTCT	GTTATCGCCCGACTCGTTAGCGAA	TGACGGTGGTGAGACCACCGTCGGCGAGAAGCGGGTTCGTCGGACCGCCGACGCGGACGGGATCGTTATCGCCCGACTCGTTAGCGAAGGTGCGCCACTC[G/A]GAGGTTTCGTCGATTGAGTGAGACTCGAGCACGAGGCCGCACTCCGAGCAGACGGTGTCTCCGGCGGAGTGATCGAACACGACCTCCGTGTGTTTCTTGC
CauSNP018	Pass	Chr3	73929470	T	C	GTTGTATCATTAACCCAACGAATA	CTGTTGTATCATTAACCCAACGAATG	AGGACTACTGATCTGGAGAGGCTTT	ATGGCACACGACATGTCCTTGTACTTGCTGATTTCTCTCCAAATTTGAGGACTACTGATCTGGAGAGGCTTTTCGTAGACTTCAAAGACAGTGGATTCCT[T/C]ATTCGTTGGGTTAATGATACAACAGCACTTGCAGTCTTCAAAACTCCTTCAACTGGTACTTATATCTAATTTGATTTTTCTCCATTCATTAGGTAGACTT
CauSNP019	Pass	Chr3	75221240	C	T	CCACCATTGTTTCCTCATGGAAG	GTCCACCATTGTTTCCTCATGGAAA	AAGATTCCGAGCCTGAGAAGACCAA	CCAAGAACCTTGAAACTTTCGAGAGTTTAGTACAAGTCGATCATCAAGTGACAGAACAGGCTGTGGAGGAGAAAGATTCCGAGCCTGAGAAGACCAACAC[C/T]TTCCATGAGGAAACAATGGTGGACCAAACCGACGGTGATTCAGAAGCTGAGTCGGAAGGAGATGATTATGGTGTTGACTCAGACGGCACTATCTCCGAAG
CauSNP020	Pass	Chr4	14063327	C	G	GATATCAAACTTGGAAGAGCCATCC	GATATCAAACTTGGAAGAGCCATCG	CCCTCTTTGGAGGTGATGCATTGAA	TTAGTTCTGACGAGAAATAACTGCACTATAATAGGAATATATGTACAAAATATAGGCATTATACCATATTTCCATTGATATCAAACTTGGAAGAGCCATC[C/G]GGATTCAATGCATCACCTCCAAAGAGGGAAGCTTTGTTCTCCGAGCAAGTCATGTATTGGAAGACCTCCCAACACGACTTCAGACCACACAGAAGGTTCC
CauSNP021	Pass	Chr4	52102326	G	A	AATTTGGGTGTTGTGGTGGCG	GAATAATTTGGGTGTTGTGGTGGCA	GAAGCTGTGGCCAACTCACAAGAAT	TGTTTAGTAGCATGTAGGTACAGTATTAGTTCATTGCATAATAATTTTCTATTTTTTTTCCTTTTGTTTCAGCAAAGAATAATTTGGGTGTTGTGGTGGC[G/A]CTCTGGTCACCTGTCATTCTTGTGAGTTGGCCACAGCTTCCTCTAACATATGCTTCCTTTCTATATATCTATGCTAACTTTCATATACAGGTTTATTTCA
CauSNP022	Pass	Chr5	311091	C	T	GTTGAACGTGAGAAATCAAGAGGG	ATGTTGAACGTGAGAAATCAAGAGGA	CTCTTCGCCAGAGGAAGGAATTGTT	TATGCAAGAAACTTCGAGTAGGAGCTGAGAATCTTACCTCCCAGTTCTCTTCGCCAGAGGAAGGAATTGTTGAGTCAGAAGAATAGCTGAGTTCAGTTTC[C/T]CCTCTTGATTTCTCACGTTCAACATTCTGATTTTCTGTTTCTTCTTGGACCTACAACGATATGGAGAAATGAGAAAATCACAGAAGCATAAATGTAGCAT
CauSNP023	Pass	Chr5	326763	G	C	CGGTCGGAGTCACTTCGGTG	CGGTCGGAGTCACTTCGGTC	CTAACTTGTAGACCGGTTCGTGCAT	GAGCATCCGACGGAAACATTTCTGTTTTCTCGGCCAGAGCCGATGGAGGTTGGGACACGACGAGGATAGACCAAGCTCACCCGGTCGGAGTCACTTCGGT[G/C]TCGTGGGCACCAGCGACGGAGCCAGGGGCGCTCGTTAGCTCCGGTATGCACGAACCGGTCTACAAGTTAGCGTCGGGAGGGTGTGATAGTACGGTGAAGG
CauSNP024	Pass	Chr5	4246754	G	C	CTGAGTCCAGCTACAGAGGAC	CTGAGTCCAGCTACAGAGGAG	ACCGTGAAGATATCGTCTCAGGGAA	AAGCATTGATTTAAACTCTTCTTGTTTTGGTTCTGCAGCTAGGGAACTACCGTGAAGATATCGTCTCAGGGAACAATAACAAGTCCCTAATGTCATCGTC[G/C]TCCTCTGTAGCTGGACTCAGAAGACCGTCTTCATCAGGTAGCTCAAGGTCGACGAGCAGACCTTCTACACCAACTAGAAGGTCTACAACCCCAACCACAA
CauSNP025	Pass	Chr5	42917099	G	C	AATGTCCGACGAAGCAAAACCG	AATGTCCGACGAAGCAAAACCC	AATGCAGTGATCGAGCTGCTTCGTA	TAACCTTTCTTTGACACTGCGATATAACTGGTAATTGCGACAAGCCGCCTTCTCCCGATCTCCGGTTTTTTCAAAGAAGAATGTCCGACGAAGCAAAACC[G/C]TCGTCCGGCGAGCACAAGTCAGGACGCGTGTACGAAGCAGCTCGATCACTGCATTCTACTGCTGTGAAAGATCTGCTATCTCGAGGGGTCTGTCTGTAAT
CauSNP026	Pass	Chr5	42919228	T	C	AGGTACGAATGTTGGGTTCAGGT	GGTACGAATGTTGGGTTCAGGC	CATCAATGATTCCTGGGATGGGCAT	TGTTAGAATATTTCCCTTTTCCGAATATCATGTTCAAATTCAACAAGTTTATGCTGATAATATGAAAGAGCTCTATTCAGGTACGAATGTTGGGTTCAGG[T/C]AGACCTTTCTTAGTCGAGGTTCAGAACTCTCGAAAATGCCCATCCCAGGAATCATTGATGGAAATTGAAGAGAAGATAAACAACTCAGAGAAAAAACTAG
CauSNP027	Pass	Chr6	1872141	G	A	GCACCATACCAGAACTTCAAGAAC	AATGCACCATACCAGAACTTCAAGAAT	TGGGAGGAACTACGTTGCTCTTCAT	CATTGCTTGAACCAAACCGGTTGATATTGCTCACTGCGCAGAGGTTTATACAGACTTTCCTTGGGAGGAACTACGTTGCTCTTCATCTCCGCAGGCATGG[G/A]TTCTTGAAGTTCTGGTATGGTGCATTTCGGTTATTTTGTTTAGTTCGGTTATTTCGGTTCAGATTTGGTTAGTTCGATTCGGAATATTGGTTAGGATTGG
CauSNP028	Mono	Chr6	6109761	G	C	CTGTGGTAAATGGGAGAAAAAGGG	ACTGTGGTAAATGGGAGAAAAAGGC	GACGGTAGCAAACTCCCGTTACTTA	TCGGATGCTCCGGCGCACGGCGGTACTGAACCGACACCGCCAAGCAATTCGCGGCTTTCACAACCTCCGTCAGGAAACTGTGGTAAATGGGAGAAAAAGG[G/C]GACTCGACGATCCATGCTCCGCCGTGGATGTAGATAAGTAACGGGAGTTTGCTACCGTCGGCGAGTTCTCTTGCTTTATGAGGAAGAAAGAGTCGAGCGG
CauSNP029	Mono	Chr6	26284432	G	A	AGGCGCTAAACCGCAGTCG	TTAGGCGCTAAACCGCAGTCA	CCCTAAAAGGCCCGGAAAGAAAAGAA	CTCGCCTCCTTTGCTTCTACGGAATCTTTTCTATCGGAAGTTGCTCCACCATCCGGTTTATACAGATTCGGTGCTTCGGCTTAGGCGCTAAACCGCAGTC[G/A]ACGTGGCGCCTCCATGTGAGGAAGGTTCCGGCGAGTTTTCATGCGGCGGCGGCTGTCACTTCTTTTCTTTCCGGGCCTTTTAGGGTTTTGGCTTTCGGTC
CauSNP030	Pass	Chr6	34494441	G	C	CCAGTATCTGTTGAAATAACTTATGGC	CCAGTATCTGTTGAAATAACTTATGGG	TGAAGCAACATGAGGATGCGCTCAA	GCAAACTAAAAGGAAAAATGTGTGCATCCTTGATAAAAGAAAGATAAAGTAAGAAAGAGGGTACAAAACTGACCTGAAGCAACATGAGGATGCGCTCAAG[G/C]CCATAAGTTATTTCAACAGATACTGGAGACAGCTGAAGGCTTCCAGCCTAGAACGAAGCAAAGTTTAGAATTGTCGTTCTAGATAGAGAGTAAAAGGTAG
CauSNP031	Pass	Chr6	40582776	G	T	GAAGGCCTTTTCCAACATTGGC	TTGAAGGCCTTTTCCAACATTGGA	CTGACCTTGAGACAGTAAGACGCTA	AGAAGACCGAGTTAAAAATATACAGGCCCTGGCACATCAAACTGACCTTGAGACAGTAAGACGCTAAAGTATCAAATTCGCTAGTACCAAGACCAGGTCC[G/T]CCAATGTTGGAAAAGGCCTTCAAACAACGTGCAGCAGCAATTCTCACTACGAATGATTTGTCCAAAGTGGAAAACCTTGTGATCAGACGGTATGCTTCAG
CauSNP032	Pass	Chr6	46214109	C	T	CGGCGCCGGCACATTTTAGG	CCGGCGCCGGCACATTTTAGA	AACGGTAACTGCGTCACAGGAGATT	GAGCTCCTCCAGGATGGACTGGCCGCTTCTGGGCTCGTACCGGCTGCAACTTCGACTCCTCCGGCAACGGTAACTGCGTCACAGGAGATTGCGGCGGCGT[C/T]CTAAAATGTGCCGGCGCCGGCGGGGTTCCTCCAGTCACACTCGCCGAATTCACCGTAGGTGAAAAGGATTACTACGACGTGAGCCTCGTCGACGGCTACA
CauSNP033	Pass	Chr7	6266029	G	A	TATAGGTGGAGACAATGGAGGC	GTTATAGGTGGAGACAATGGAGGT	GATTCCACCAACGGTTTCTCCACAA	TAATACCACCAACAATTTCTCCACAAACACCACCAACCTCTCCTCCACGATCACCACCCATGTCACCGCCTAGGATTCCACCAACGGTTTCTCCACAAAC[G/A]CCTCCATTGTCTCCACCTATAACACCACCAACAGCTCCTCCGCGAGCACCACCTATGTCTCCTCCAAGAACACCACCAACCTCTCCTCCGCTTGCACCAC
CauSNP034	Pass	Chr7	7108476	T	G	CCCCGCTCATTAGCACAGGT	CCCGCTCATTAGCACAGGG	GCTCAGAGGGCCCTTAAGAAGATTA	TTGAGCCCTACACTAAGAAGTTTTTGAGTTTCAACTCAATTACCTTAGTTAAGTAAGACATAGCCATAGCATCATGTCCTGCCCCGCTCATTAGCACAGG[T/G]ACCTCGTCTTGGATCTCTCCTGTAATCTTCTTAAGGGCCCTCTGAGCTGCTGATTTCAGCTGTAAACTCAAATGAGGGTCTGATATTACTGCGTCTGCGT
CauSNP035	Mono	Chr7	14308417	G	A	AGGGATCGATCCGAAGGCC	AAGGGATCGATCCGAAGGCT	CCACTTATAGTGTCGTGCTTGGTGAT	CAGGAGTGAAGAGATTCTTCAAGAGAGAGATGTTGAAGAGATATCCACTTATAGTGTCGTGCTTGGTGATGGGGTCTCTGAACTTCACGCGCTCATCGTA[G/A]GCCTTCGGATCGATCCCTTGGTCGTCGAAAAGGTGAGGAAGATCCTTGTATAGGAACCCGACGAGCTGTTCCATGTCCACCGTCGATGTCGGAGGCGTTT
CauSNP036	Pass	Chr7	18611643	C	G	ACAGCTTTTTGTTCCCGAGCTCG	ACAGCTTTTTGTTCCCGAGCTCC	TGGACCGGAATCACCTGCAACAAAT	ATCTCAAACCAAAACCAGACGATTGGCTCCTCAACGACGATTGCTGCAGCTGGACCGGAATCACCTGCAACAAATCAGACAACAACAGAGTCACCAAACT[C/G]GAGCTCGGGAACAAAAAGCTGTCGGGGAAACTGTCTGAATCATCGCTACAGAACCTAGATCAGATCACGGTACTCAACCTCTCTCGGAACTTCATCAGAG
CauSNP037	Pass	Chr7	26326101	G	A	TTTCTTCTCAGGAGCAGCGACA	CTTCTCAGGAGCAGCGACG	CGAATATGATCACCAGCACCAGCAA	AAATCCAGCCTTTAGTGCAGACCATCTCGTGGATCGTAGCTGCTCTTGTGATTGCTATTAATGGGTATCTGATGGTGGATTTCTTCTCAGGAGCAGCGAC[G/A]AGTGTGGTTTTGCTGGTGCTGGTGATCATATTCGCTGTTGCTTATGTGGTGTTTGTGCTTTACCTTATCTCAAGAGGCCTCACGTATACTCCTTGGCAGC
CauSNP038	Pass	Chr7	49710841	C	T	GTCTAGATTAATCTGGACTGTGTTG	CGTCTAGATTAATCTGGACTGTGTTA	CTACCGAGACACTTGATGTGGGTTA	TTAATTCCTCTGCTTCGTGTTCGGCCATGGAAATCGAAATTCATAGAGCTGAAGTCTACACGAGGGTGTCGAACCTACCGAGACACTTGATGTGGGTTAC[C/T]AACACAGTCCAGATTAATCTAGACGAATTGATCCAACACGAAACTGGAGCGGTAACTGTTTTAGGATCACGTCGCATCCGCTTGAGGCCACGTGGCCGCG
CauSNP039	Pass	Chr8	685258	A	G	CAAGCAGCCTACAAGCAACTTGT	AAGCAGCCTACAAGCAACTTGC	CCTTGGATGACCCTGAGAAGAAGTT	TATCTCAGGGAGCGTTTGGTGCGTATGAAGATAAGAAGCATAGGGCTACATATGAAGCCTTGGATGACCCTGAGAAGAAGTTTAGGTTTTTCTCTGCTCG[A/G]CAAGTTGCTTGTAGGCTGCTTGGGAGCAGAGGTTATTTATGCCAGAAGGTAATTTCACTTTTACTCTTCTTGAATTGCTTTGTGATTCTAATTCCATGTA
CauSNP040	Pass	Chr8	7993815	A	T	CCGTGCACTAACATCGACTCGA	CCGTGCACTAACATCGACTCGT	CGCTGTTCTCATACGACGATGGATA	CTTCCCTCAAAGGCTCTAAAACCAGCTCAGTAAGACTCCTCCTGGTTTCGGTTAGTGTTGCATGAACTTTGCCATGGTGCCGTGCACTAACATCGACTCG[A/T]ACCTAATTATTATTGGTTTATCCATCGTCGTATGAGAACAGCGGTTCTTATAAAACATACATAGCAACATATACAGAGAACAAGAAACTTGCCGGAGAAA
CauSNP041	Pass	Chr8	10333745	C	G	AGGTTTAGATACGAAGGTCTTGTC	AGGTTTAGATACGAAGGTCTTGTG	TTGCTATGAAGAGCGACACAGCCAA	CCTTTATGAAGATTGTTTCTGTCTCCTCTGGTCCTTTGCTTCTCAACGCTTTCATTCTCGTTGCCGAAGGCAACGAGAGGTTTAGATACGAAGGTCTTGT[C/G]TTGGCTGTGTCGCTCTTCATAGCAAAGAGCGTTGAGTCTTTATCCCAGAGACAATGGTACTTCAGAAGCAGACTTGTCGGTTTACGCGTGAGGTCTCTCC
CauSNP042	Pass	Chr8	10995531	G	A	CCGACAAAACCTAACTGAGCC	CTCCGACAAAACCTAACTGAGCT	CTCACTGCACGACCGGTTCCTAA	ACAAGAATCTCGTTTCGCTGATCAACGCGGCCGGAGCTACTGCAGTGGGGTTGTCGGGGCACGACGGTCGTCTTCTCACTGCACGACCGGTTCCTAACTC[G/A]GCTCAGTTAGGTTTTGTCGGAGAAGTTGCAAGAGTTGATCCAAACGTGTTGCGTCCCCTCGTTGACTACGGTTACATTCCGGTGATTGCGTCTGTTGCGG
CauSNP043	Fail	Chr8	14927553	A	C	AACAAATCAAATGCCCGTGGAAGA	AACAAATCAAATGCCCGTGGAAGC	GAACTTTGTTGACCCTAGGGGGAAA	GAAAAAAAAGGTAGATAAGTAGTAGCAGAATATAGAAAATGGAGACTAGATGGCATAAGATGGTGAAAAGGTTACCTAACAAATCAAATGCCCGTGGAAG[A/C]AGTTTCCCCCTAGGGTCAACAAAGTTCGGGCCAGCATTCATCAGCAAGCTTGCAAATTGAGCTCTGACAGTAAGAGTTGAACAGCATCAGCAATGTAAAT
CauSNP044	Pass	Chr8	16285895	A	G	CCCAACCCAAGCCACGACCA	CCAACCCAAGCCACGACCG	GGTTAACCCTCCGCTTGAGAATGAT	CATTTCTAACCCAATCCTCCGCAAAAATCTTACAGTTTTCATTCGTTTGTGAACTCACTAACTTACTTATTTGCAGAGCAGCCCAACCCAAGCCACGACC[A/G]AGCAGCTCTTCCACGGTGGTTGTGGCTGGTGTAATATAAACCATATTCCCAAAACAATCATTCTCAAGCGGAGGGTTAACCCTCTGCCTCAAGTCCACCA
CauSNP045	Pass	Chr8	23662826	C	A	AGATATGGTTCCCTTCTGAAGGC	GAGATATGGTTCCCTTCTGAAGGA	GGCGCACTCCTGTAAATTTGTGGAT	CAAAGCTAAATCTCATAAAGAACTTTCCTTGGTGTTTTGTTGGTTGTTGATAGACATATGGGATCTTTGAAGTATATGAGATATGGTTCCCTTCTGAAGG[C/A]AATCCACAAATTTACAGGAGTGCGCCAAAACTATGGCAAGTCTTTCTCTCCTTTGACCTGGATTTGAGTCAATCTTGTCTATTGGATCTCAGTTTTTTCA
CauSNP046	Pass	Chr8	24753546	C	A	ATGGTCAACGGTCTCATCGGC	CATGGTCAACGGTCTCATCGGA	CAGTTCTGAGCACTGCACACACAAA	CTGAATCTGACGAGAGTGGTAACGTTGATTTGAGTGTTGATTTCCCTGGGGAACGCGCTGAGCCTACTCATCTAGTCGTCATGGTCAACGGTCTCATCGG[C/A]AGGTTCTTTGTTGTTGTGTGTTTGATTATATTCGATTTCAAGCTGTTCTTGATAATGTTTTGTGTGTGCAGTGCTCAGAACTGGAGATTTGCTGCTAAGC
CauSNP047	Pass	Chr8	51980792	T	C	TTTGAAATGGATGGCGAGGAGCTT	GAAATGGATGGCGAGGAGCTC	GCTCTCGGATAAGCACAGCTTTCTT	ATCCGGACATTCTGCTGAGGCTCGAGGAGCTGGAGCGGGAGGAAGCCATCAGACAAGCTAACGGCGAGGAGGAAGATTTTGAAATGGATGGCGAGGAGCT[T/C]ACCGAGGAGCAGAAGGAGCAGCTTGCTAAGATTAGGAACAAGAAAGCTGTGCTTATCCGAGAGCATAGGCTCAAGAAGACGGTTGCACAGAACAGATCAA
CauSNP048	Pass	Chr9	2367375	C	T	GAAGACGAGGAGCGGAATGTG	GGAAGACGAGGAGCGGAATGTA	CGACACCGACCAAAGAGTGCAAAAT	CCTCTTCTTCATCTCTTGTATACAATCAAACCAACACATACAGAGAGACGACACCGACCAAAGAGTGCAAAATGGCAGCGACGACTCTCTCCATCGCAAC[C/T]ACATTCCGCTCCTCGTCTTCCCATGGCTTCCCTTCCCGACCCAACACAACATTCCGCATCGGTTCACCTTCCTGCACCTTGACAAGCTTGGCGTTGAAGG
CauSNP049	Fail	Chr9	55272926	T	G	TAACATTAATGTCTCTCTTCTCAGGA	ACATTAATGTCTCTCTTCTCAGGC	TTAGCTTCCCAGTATCTGACTCTGATTT	TCTTTGTCTTCTCTGCGAGTGTCTCCCGGAGTTTCGCCGGATCTACTTCTCCGGTCACCGTTAGCTTCCCAGTATCTGACTCTGATTTCACCGTCTCAAC[T/G]CCTGAGAAGAGAGACATTAATGTTACTTTTTACAGTGAAAACATTAGCTTTGTGGCTTTTAAAGAGGAAAAAACAAACCTTTGAAAGCACGTGCGCATTT
CauSNP050	Mono	Chr9	61966975	C	A	CCTGCGTGTGACCCAGCAC	ATCCTGCGTGTGACCCAGCAA	CCCTCATCGCCTTCTCTATTGGAAA	TGTAGTAGGTTGGTAAGTTCAAGTCAGAGAACTTTGAAACTGGCTCTAAAGACTTGACTAATATCTTGGTACAGAACTTGATCCTGCGTGTGACCCAGCA[C/A]GCGTATAAACCGTTTCCAATAGAGAAGGCGATGAGGGAAACACCAACGCCATCGGTGGCTGGCATTTGGAAACAGAGCAAGAGGATTCCTGAGGAGAGAG
CauSNP051	Mono	Chr9	64903707	G	A	GTGTTTACCCGTTACAGGTTGTG	TGTGTTTACCCGTTACAGGTTGTA	CGTTTCTACAATCACAGACAAGCAAGAAA	GGGTTCAAATTTGTGCAGAGCCGGGTCCGTTGATACAGCTGAGCTGTGGGATGACATCAGGAGCTCTTGGTGCATCGTGTGTTTACCCGTTACAGGTTGT[G/A]AGAACAAGGTAAAACAAGAGTTTTGTGTTTTCTTTTTCTTGCTTGTCTGTGATTGTAGAAACGAGTTTGATTTATTTCTGTTTGTTAGAATGCAAGCGGA

## Sheet: Table S4
Table S4. Two recommended marker sets each containing 25 SNPs
Core marker set 1	Core marker set 2
CauSNP001	CauSNP001
CauSNP003	CauSNP003
CauSNP004	CauSNP004
CauSNP006	CauSNP005
CauSNP009	CauSNP009
CauSNP011	CauSNP010
CauSNP013	CauSNP011
CauSNP016	CauSNP012
CauSNP020	CauSNP013
CauSNP021	CauSNP016
CauSNP025	CauSNP020
CauSNP026	CauSNP021
CauSNP030	CauSNP022
CauSNP031	CauSNP024
CauSNP033	CauSNP025
CauSNP034	CauSNP031
CauSNP036	CauSNP033
CauSNP038	CauSNP034
CauSNP039	CauSNP036
CauSNP040	CauSNP038
CauSNP041	CauSNP040
CauSNP042	CauSNP041
CauSNP045	CauSNP045
CauSNP047	CauSNP047
CauSNP048	CauSNP048

## Sheet: Table S5
Table S5. Core germplasm samples of 153 cauliflower cultivars
Sample ID
PN_0746
PN_0757
PN_0779
PN_0738
PN_0758
PN_0708
PN_0774
PN_0613
PN_0765
PN_0717
PN_0727
PN_0650
PN_0764
PN_0775
PN_0827
PN_0276
PN_0601
PN_0728
PN_0359
PN_0081
PN_0725
PN_0799
PN_0362
PN_0321
PN_0652
PN_0719
PN_0662
PN_0825
PN_0667
PN_0654
PN_0783
PN_0720
PN_0784
PN_0759
PN_0807
PN_0810
PN_0707
PN_0748
PN_0802
PN_0668
PN_0781
PN_0653
PN_0669
PN_0753
PN_0327
PN_0672
PN_0306
PN_0469
PN_0714
PN_0794
PN_0625
PN_0711
PN_0455
YC_0062
PN_0607
PN_0712
YC_0071
PN_0815
PN_0012
PN_0685
PN_0220
PN_0062
PN_0528
PN_0116
PN_0070
PN_0690
PN_0622
PN_0811
PN_0755
PN_0495
PN_0604
YC_0129
PN_0166
PN_0683
PN_0007
PN_0041
PN_0788
YC_0147
PN_0099
PN_0199
PN_0516
PN_0158
PN_0483
PN_0353
PN_0380
PN_0680
PN_0222
PN_0129
PN_0161
YC_0068
PN_0501
PN_0093
PN_0141
PN_0145
PN_0500
PN_0029
PN_0155
PN_0136
PN_0101
PN_0242
PN_0795
PN_0202
PN_0183
PN_0103
PN_0681
PN_0736
PN_0065
PN_0252
PN_0251
PN_0505
PN_0134
PN_0424
PN_0126
PN_0140
PN_0046
PN_0050
PN_0217
PN_0272
PN_0304
PN_0139
PN_0226
PN_0358
PN_0047
PN_0663
PN_0176
PN_0096
PN_0660
PN_0642
PN_0462
PN_0741
YC_0025
PN_0605
PN_0703
PN_0460
PN_0236
PN_0423
PN_0521
PN_0651
PN_0694
PN_0309
PN_0689
PN_0049
PN_0645
PN_0260
PN_0345
PN_0446
PN_0803
PN_0771
PN_0606
PN_0634
PN_0180
PN_0644
PN_0631
